# Supplementary material
Source: ML conference proceedings conference paper supplement (https://openreview.net/forum?id=edmYVRkYZv)
Supplement: supplementary_material [file attachment]

---

# TacticZero: Learning to Prove Theorems from Scratch with Deep Reinforcement Learning

## Supplementary Materials

---

Anonymous Author(s)

Affiliation

Address

email

### 1 Embedding HOL4 in an MDP — A Sketch of the Software Environment

2 Rather than interacting directly with the HOL4 ITP engine, our agent acts on the more abstract MDP  
3 formulation introduced in main submission. In terms of software, we achieve this by defining a  
4 reinforcement learning environment which appropriately wraps HOL4. The API of our environment  
5 is inspired by that of Gym Brockman et al. [2016]. An instance  $e$  of the environment can be created  
6 by calling `HolEnv(g)` with an initial goal  $g$  (which represents the theorem to be proved). An action  
7  $a$  can be taken by executing `e.step(a)` and the return value of this function is a pair consisting of  
8 the immediate reward and a boolean indicating whether the proof attempt has finished. Internally, the  
9 environment keeps track of the states encountered during the proof search.

10 Given a goal  $g$ , a tactic  $t$  and an argument list  $c$ , one may call `e.query(g, t, c)` independently of  
11 the `e.step(a)` function, to inspect the result of applying a tactic. The execution of a single query  
12 takes around 15 milliseconds on a regular laptop on average.

13 Once the environment detects a successful proof attempt (*i.e.*, an empty fringe), it re-constructs a  
14 HOL4 proof script from the MDP state sequence (along with some book-keeping information) and  
15 sends it to HOL4 for verification. The implied proof search can also be visualized by our software  
16 as an interactive tree which depicts all the information—see Figure 1 (which is the same search as  
17 Figure 6b in the main submission) and the interactive HTML version of that plot in the included file  
18 `proof_search_trees/Figure1.html`.

19 The proof search represented by Figure 1 is neither a breadth first search nor a depth first search, but  
20 a unique proof search managed by the agent itself, as indicated by the “Step” entry in the edge labels  
21 of the interactive version of the plot. We have also separated “assumptions” and “goal” in the fringes  
22 for better readability. From the agent’s point of view, the “assumptions” and the “goal” are merged  
23 into one formula by chained implications, as mentioned in footnote 1 of the paper.

### 2 Space of Arguments

25 For each episode, a set of candidate theorems that can be selected as arguments is computed at  
26 the beginning of the episode. Duplicates are allowed in the list of arguments. The set of candidate  
27 theorems consists of all the theorems coming from the theories mentioned in the theorem to be proved,  
28 except for those that come after the theorem that is being proved in the library.

29 For example, if the agent is trying to prove theorem  $\forall x, \bigcup\{x\} = x$  which is a theorem from the  
30 `pred_set` theory, the candidate set will contain *a*) all the theorems from the `bool` theory (because  
31 the symbol  $\forall$  comes from `bool` theory), and *b*) all the theorems whose proof precedes that of  
32  $\forall x, \bigcup\{x\} = x$  from within `pred_set` theory.

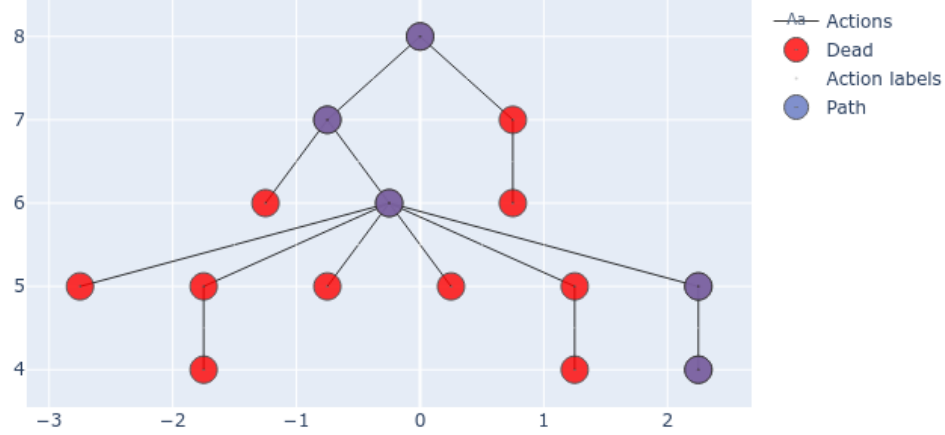

Figure 1: The visualization (in HTML) of a successful proof search of the theorem  $\forall x s. x \in s \Rightarrow \forall f. f(x) \in \text{IMAGE } f s$ . This particular proof was found in 13 steps. Red nodes represent the fringes that never lead to a successful proof, and blue nodes consist of a path from which a valid HOL4 proof can be re-constructed. Detailed information for both the edges and vertices can be revealed by hovering the mouse over the corresponding part of the HTML version of the plot, which is included in the supplementary materials as file `proof_search_trees/Figure1.html`.

33 The average size of such a set of candidate theorems for each theorem in our dataset (see  
 34 `dataset.pdf` in the supplementary materials) is 468. In other words, the argument policy has  
 35 to look at 468 theorems on average whenever the agent chooses an argument to a tactic. If the number  
 36 of required arguments  $L$  is  $n$ , then the search space of the argument list is  $468^n$ .

### 37 3 Use of HOL4

38 There are many extant interactive theorem-proving systems currently used, and being developed in  
 39 the world today. Though some may share similar logical underpinnings (*e.g.*, HOL LIGHT and HOL4  
 40 are *incompatible* systems implementing the same logic), this is not necessarily the case (*e.g.*, COQ  
 41 and HOL4 are fundamentally different). In addition, systems are implemented in different underlying  
 42 programming languages; do not generally inter-operate at all; and prove different libraries of results.  
 43 This fractured landscape makes comparing learning results across different systems impossible to do  
 44 in any principled way. Moreover, as our bibliography and related work make clear, existing work in  
 45 the application of machine learning to interactive theorem-proving has already “embraced” this chaos  
 46 and chosen to work with a variety of different systems.

47 Our choice of HOL4 as a background system is grounded both in our own expertise with it, and some  
 48 technical advantages crucial to reinforcement learning:

- 49 • HOL4’s use of theory files stored on disk means it is quick to start in any chosen logical  
 50 context;
- 51 • HOL4’s implementation language, Poly/ML has good support for multi-threading and  
 52 concurrent execution

## 53 4 Example Proofs

54 The subsequent pages of this document include several example proofs presented in the same format  
 55 as Figure 6a of the main submission.

*(\* TacticZero proof \*)*

Theorem EVERY\_CONJ:

$\forall P Q l. \text{EVERY } (\lambda(x:'a). (P x) \wedge (Q x)) l = (\text{EVERY } P l \wedge \text{EVERY } Q l)$

Proof

rw[] > Induct\_on 'l'  
 >- (rw[listTheory.EVERY\_DEF])  
 >- (rw[listTheory.EVERY\_DEF] > metis\_tac[])

QED

(\*  
*(\* Original human proof \*)*  
 NTAC 2 GEN\_TAC THEN LIST\_INDUCT\_TAC THEN  
 ASM\_REWRITE\_TAC [EVERY\_DEF] THEN  
 CONV\_TAC (DEPTH\_CONV BETA\_CONV) THEN  
 REPEAT (STRIP\_TAC ORELSE EQ\_TAC) THEN  
 FIRST\_ASSUM ACCEPT\_TAC);  
 \*)

*(\* TacticZero proof \*)*

Theorem MONO\_EXISTS:

$(\forall x. P x \Rightarrow Q x) \Rightarrow (\text{EXISTS } P l \Rightarrow \text{EXISTS } Q l)$

Proof

rw[listTheory.EXISTS\_MEM] > metis\_tac[]

QED

(\*  
*(\* Original human proof \*)*  
 Q.ID\_SPEC\_TAC 'l' THEN LIST\_INDUCT\_TAC THEN  
 ASM\_SIMP\_TAC (srw\_ss()) [DISJ\_IMP\_THM];  
 \*)

*(\* TacticZero proof \*)*

Theorem FLAT\_APPEND:

$\forall l1 l2. \text{FLAT } (\text{APPEND } l1 l2) = \text{APPEND } (\text{FLAT } l1) (\text{FLAT } l2)$

Proof

strip\_tac > strip\_tac >  
 Induct\_on 'l1'  
 >- (rw[listTheory.APPEND, listTheory.FLAT])  
 >- (fs[listTheory.APPEND]  
 > fs[listTheory.APPEND\_ASSOC, listTheory.FLAT])

QED

(\*  
*(\* Original human proof \*)*  
 LIST\_INDUCT\_TAC  
 THEN REWRITE\_TAC [APPEND, FLAT]  
 THEN ASM\_REWRITE\_TAC [APPEND\_ASSOC];  
 \*)

```

(* TacticZero proof *)

Theorem MEM_MAP_f:
   $\forall f\ l\ a. \text{MEM } a\ l \Rightarrow \text{MEM } (f\ a)\ (\text{MAP } f\ l)$ 
Proof
  strip_tac > strip_tac > strip_tac
  > rw[listTheory.MEM_MAP] > (metis_tac[listTheory.MEM_MAP])
QED
(*
  (* Original human proof *)
  PROVE_TAC[MEM_MAP]
  *))

(* TacticZero proof *)

Theorem REVERSE_11:
   $(\forall l1\ l2: 'a\ \text{list}. (\text{REVERSE } l1 = \text{REVERSE } l2) \Leftrightarrow (l1 = l2))$ 
Proof
  strip_tac > strip_tac
  > metis_tac[listTheory.REVERSE_REVERSE]
QED
(*
  (* Original human proof *)
  REPEAT GEN_TAC THEN EQ_TAC THEN1
    (DISCH_THEN (MP_TAC o AP_TERM "REVERSE : 'a list  $\rightarrow$  'a list") THEN
      REWRITE_TAC [REVERSE_REVERSE]) THEN
    STRIP_TAC THEN ASM_REWRITE_TAC []);
  *))

(* TacticZero proof *)

Theorem FILTER_COMM:
   $\forall f1\ f2\ l. \text{FILTER } f1\ (\text{FILTER } f2\ l) = \text{FILTER } f2\ (\text{FILTER } f1\ l)$ 
Proof
  Induct_on 'l'
  >- rw[]
  >- rw[]
QED
(*
  (* Original human proof *)
  NTAC 2 GEN_TAC
  THEN BasicProvers.Induct
  THEN REWRITE_TAC [FILTER]
  THEN GEN_TAC
  THEN REPEAT COND_CASES_TAC
  THEN ASM_REWRITE_TAC [FILTER]);
  *))

```

## 56 References

- 57 G. Brockman, Vicki Cheung, Ludwig Pettersson, J. Schneider, John Schulman, Jie Tang, and  
 58 W. Zaremba. OpenAI Gym. *ArXiv*, abs/1606.01540, 2016.

*(\* TacticZero proof \*)*

Theorem ABSORPTION:

$\forall x:'a. \forall s. (x \text{ IN } s) \Leftrightarrow (x \text{ INSERT } s = s)$

Proof

```
strip_tac
> rw[pred_setTheory.INSERT_DEF]
> fs[pred_setTheory.GSPEC_ETA, pred_setTheory.INSERT_DEF]
> metis_tac[pred_setTheory.SPECIFICATION]
```

QED

```
(*
(* Original human proof *)
REWRITE_TAC [EXTENSION,IN_INSERT] THEN
REPEAT (STRIP_TAC ORELSE EQ_TAC) THEN
ASM_REWRITE_TAC [] THEN
FIRST_ASSUM (fn th => fn g => PURE_ONCE_REWRITE_TAC [SYM(SPEC_ALL th)] g)
THEN DISJ1_TAC THEN REFL_TAC
*)
```

*(\* TacticZero proof \*)*

Theorem DISJOINT\_INSERT:

$(\forall (x:'a) s t. \text{DISJOINT } (x \text{ INSERT } s) t \Leftrightarrow \text{DISJOINT } s t \wedge x \text{ NOTIN } t)$

Proof

```
strip_tac > strip_tac > strip_tac
> fs[pred_setTheory.IN_INSERT, pred_setTheory.INSERT_DEF, pred_setTheory.IN_DISJOINT]
> metis_tac[]
```

QED

```
(*
(* Original human proof *)
REWRITE_TAC [IN_DISJOINT,IN_INSERT] THEN
CONV_TAC (ONCE_DEPTH_CONV NOT_EXISTS_CONV) THEN
REWRITE_TAC [DE_MORGAN_THM] THEN
REPEAT GEN_TAC THEN EQ_TAC THENL
[let val v = genvar (==':'a'==)
  val GTAC = X_GEN_TAC v
  in DISCH_THEN (fn th => CONJ_TAC THENL [GTAC,ALL_TAC] THEN MP_TAC th)
  THENL [DISCH_THEN (STRIP_ASSUME_TAC o SPEC v) THEN ASM_REWRITE_TAC [],
        DISCH_THEN (MP_TAC o SPEC ("x:'a")) THEN REWRITE_TAC[]]
  end,
  REPEAT STRIP_TAC THEN ASM_CASES_TAC ("x:'a = x") THENL
  [ASM_REWRITE_TAC[], ASM_REWRITE_TAC[]]]
*)
```

*(\* TacticZero proof \*)*

Theorem INSERT\_INTER:

$(\forall x:'a. \forall s\ t. (x\ \text{INSERT}\ s)\ \text{INTER}\ t = (\text{if } x\ \text{IN}\ t\ \text{then } x\ \text{INSERT}\ (s\ \text{INTER}\ t)\ \text{else } s\ \text{INTER}\ t))$

Proof

strip\_tac > strip\_tac >

rw[pred\_setTheory.INSERT\_DEF, pred\_setTheory.SPECIFICATION, pred\_setTheory.INTER\_DEF]

>- (rw[pred\_setTheory.GSPEC\_ETA] > metis\_tac[])

>- (rw[] > (rw[pred\_setTheory.GSPEC\_ETA] >> metis\_tac[]))

QED

(\*

*(\* Original human proof \*)*

REPEAT GEN\_TAC THEN COND\_CASES\_TAC THEN

ASM\_REWRITE\_TAC [EXTENSION, IN\_INTER, IN\_INSERT] THEN

GEN\_TAC THEN EQ\_TAC THENL

[STRIP\_TAC THEN ASM\_REWRITE\_TAC [],

STRIP\_TAC THEN ASM\_REWRITE\_TAC [],

PURE\_ONCE\_REWRITE\_TAC [CONJ\_SYM] THEN

DISCH\_THEN (CONJUNCTS\_THEN MP\_TAC) THEN

STRIP\_TAC THEN ASM\_REWRITE\_TAC [],

STRIP\_TAC THEN ASM\_REWRITE\_TAC []]);

\*)

*(\* TacticZero proof \*)*

Theorem SET\_MINIMUM:

$(\forall s:'a \rightarrow \text{bool}. \forall M. (\exists x. x\ \text{IN}\ s) \Leftrightarrow \exists x. x\ \text{IN}\ s \wedge \forall y. y\ \text{IN}\ s \Leftrightarrow M\ x \leq M\ y)$

Proof

rw[]

> fs[boolTheory.IMP\_CONG, boolTheory.EQ\_TRANS, boolTheory.EQ\_IMP\_THM]

> rw[arithmeticTheory.WOP\_measure, boolTheory.COND\_ABS]

> metis\_tac[boolTheory.ONE\_ONE\_THM]

QED

(\*

*(\* Original human proof \*)*

REPEAT (STRIP\_TAC ORELSE EQ\_TAC) THENL

[IMP\_RES\_THEN (ASSUME\_TAC o ISPEC ("M:'a→num")) lemma THEN

let val th = SET\_SPEC\_CONV ("(n:num) IN M x | (x:'a) IN s")

in IMP\_RES\_THEN (STRIP\_ASSUME\_TAC o REWRITE\_RULE [th]) NUM\_SET\_WOP

end THEN EXISTS\_TAC ("x:'a") THEN CONJ\_TAC THENL

[FIRST\_ASSUM ACCEPT\_TAC,

FIRST\_ASSUM (SUBST\_ALL\_TAC o SYM) THEN

REPEAT STRIP\_TAC THEN FIRST\_ASSUM MATCH\_MP\_TAC THEN

EXISTS\_TAC ("y:'a") THEN CONJ\_TAC THENL

[REFL\_TAC, FIRST\_ASSUM ACCEPT\_TAC]],

EXISTS\_TAC ("x:'a") THEN FIRST\_ASSUM ACCEPT\_TAC]

\*)

*(\* TacticZero proof \*)*

Theorem INJ\_DELETE:

$(\forall f \ s \ t. \text{INJ } f \ s \ t \implies \forall e. e \text{ IN } s \implies \text{INJ } f \ (s \text{ DELETE } e) \ (t \text{ DELETE } (f \ e)))$

Proof

strip\_tac > strip\_tac > strip\_tac

> fs[] > rw[]

> (fs[pred\_setTheory.INJ\_DEF] >  
     (strip\_tac > fs[pred\_setTheory.IN\_DELETE, boolTheory.IMP\_DISJ\_THM]  
     >- (metis\_tac[pred\_setTheory.IN\_APP])  
     >- (fs[] > (fs[] > (fs[] > (metis\_tac[])))))

QED

(\*

*(\* Original human proof \*)*

RW\_TAC bool\_ss [INJ\_DEF, DELETE\_DEF] THENL

[ $\sim(e = x)$ ] by FULL\_SIMP\_TAC bool\_ss

[DIFF\_DEF, DIFF\_INSERT, DIFF\_EMPTY, IN\_DELETE] THEN

FULL\_SIMP\_TAC bool\_ss [DIFF\_DEF, DIFF\_INSERT, DIFF\_EMPTY, IN\_DELETE] THEN

METIS\_TAC [],

METIS\_TAC [IN\_DIFF]]);

\*)

*(\* TacticZero proof \*)*

Theorem IMAGE\_SURJ:

$(\forall f: 'a \rightarrow 'b. \forall s \ t. \text{SURJ } f \ s \ t = ((\text{IMAGE } f \ s) = t))$

Proof

strip\_tac > strip\_tac > rw[pred\_setTheory.SURJ\_DEF]

> fs[] > fs[pred\_setTheory.EXTENSION]

> fs[pred\_setTheory.SPECIFICATION] > fs[]

> fs[pred\_setTheory.IMAGE\_applied]

> fs[pred\_setTheory.IN\_APP, boolTheory.RES\_EXISTS\_THM]

> metis\_tac[]

QED

(\*

*(\* Original human proof \*)*

PURE\_REWRITE\_TAC [SURJ\_DEF, EXTENSION, IN\_IMAGE] THEN

REPEAT GEN\_TAC THEN EQ\_TAC THENL

[REPEAT (STRIP\_TAC ORELSE EQ\_TAC) THENL

[RES\_TAC THEN ASM\_REWRITE\_TAC [],

MAP EVERY PURE\_ONCE\_REWRITE\_TAC [[CONJ\_SYM], [EQ\_SYM\_EQ]] THEN

FIRST\_ASSUM MATCH\_MP\_TAC THEN FIRST\_ASSUM ACCEPT\_TAC],

DISCH\_THEN (ASSUME\_TAC o CONV\_RULE (ONCE\_DEPTH\_CONV SYM\_CONV)) THEN

ASM\_REWRITE\_TAC [] THEN REPEAT STRIP\_TAC THENL

[EXISTS\_TAC ( $x: 'a$ ) THEN ASM\_REWRITE\_TAC [],

EXISTS\_TAC ( $x': 'a$ ) THEN ASM\_REWRITE\_TAC []]]

\*)
