# Supplementary material
Source: ML conference proceedings conference paper supplement (https://openreview.net/forum?id=edmYVRkYZv)
Supplement: supplementary_material [file attachment]

|                                                                                                                                                                                                                                                                                                                                                          |
|----------------------------------------------------------------------------------------------------------------------------------------------------------------------------------------------------------------------------------------------------------------------------------------------------------------------------------------------------------|
| $\forall (s1 : \alpha \rightarrow \text{bool}) (s2 : \alpha \rightarrow \text{bool}). s1 \subset s2 \Leftrightarrow s1 \subseteq s2 \wedge \neg (s2 \subseteq s1)$                                                                                                                                                                                       |
| $\forall (p : \text{num} \rightarrow \text{bool}). (\exists (n : \text{num}). p\ n) \Leftrightarrow p\ (\$LEAST\ p) \wedge \forall (n : \text{num}). n < \$LEAST\ p \Rightarrow \neg p\ n$                                                                                                                                                               |
| $\forall (f : \beta \rightarrow \gamma) (g : \alpha \rightarrow \beta) (l : \alpha \text{ list}). \text{MAP}\ f\ (\text{MAP}\ g\ l) = \text{MAP}\ (f \circ g)\ l$                                                                                                                                                                                        |
| $(x : \alpha) \in \text{RDOM}\ ((R : \alpha \rightarrow \beta \rightarrow \text{bool}) \setminus\setminus (k : \alpha)) \Leftrightarrow x \in \text{RDOM}\ R \wedge x \neq k$                                                                                                                                                                            |
| $\text{WF}\ (R : \alpha \rightarrow \alpha \rightarrow \text{bool}) \Rightarrow \text{antisymmetric}\ R$                                                                                                                                                                                                                                                 |
| $\forall (P : \alpha \text{ option} \rightarrow \text{bool}). (\forall (a : \alpha). P\ (\text{SOME}\ a)) \wedge P\ (\text{NONE} : \alpha \text{ option}) \Rightarrow \forall (x : \alpha \text{ option}). P\ x$                                                                                                                                         |
| $\text{PROD\_SET}\ (\emptyset : \text{num} \rightarrow \text{bool}) = (1 : \text{num})$                                                                                                                                                                                                                                                                  |
| $(p : \text{bool}) \wedge (q : \text{bool}) \Rightarrow p$                                                                                                                                                                                                                                                                                               |
| $\forall (R : \alpha \rightarrow \alpha \rightarrow \text{bool}) (P : \alpha \rightarrow \text{bool}). (\forall (x : \alpha). (\forall (y : \alpha). R\ y\ x \Rightarrow P\ y) \Rightarrow P\ x) \Rightarrow \forall (x : \alpha). \text{WFP}\ R\ x \Rightarrow P\ x$                                                                                    |
| $\forall (t : \text{bool}). t \wedge T \Leftrightarrow t$                                                                                                                                                                                                                                                                                                |
| $\forall (s : \alpha \rightarrow \text{bool}) (t : \alpha \rightarrow \text{bool}) (x : \alpha). x \in s\ \text{DIFF}\ t \Leftrightarrow x \in s \wedge x \notin t$                                                                                                                                                                                      |
| $\forall (s : \alpha \rightarrow \text{bool}) (t : \alpha \rightarrow \text{bool}) (x : \alpha). (s\ \text{DELETE}\ x) \cap t = s \cap t\ \text{DELETE}\ x$                                                                                                                                                                                              |
| $\forall (a : \alpha \rightarrow \text{bool}) (b : \alpha \rightarrow \text{bool}) (c : \beta \rightarrow \text{bool}) (d : \beta \rightarrow \text{bool}). a \subseteq b \wedge c \subseteq d \Rightarrow a \times c \subseteq b \times d$                                                                                                              |
| $\forall (s : \alpha \rightarrow \text{bool}) (n : \text{num}). s\ \text{HAS\_SIZE}\ n \Rightarrow \text{CARD}\ s = n$                                                                                                                                                                                                                                   |
| $\forall (f : \alpha \rightarrow \beta) (x : \alpha \text{ option}) (y : \beta). \text{OPTION\_MAP}\ f\ x = \text{SOME}\ y \Leftrightarrow \exists (z : \alpha). x = \text{SOME}\ z \wedge y = f\ z$                                                                                                                                                     |
| $\forall (x : \text{num} \rightarrow \alpha \rightarrow \text{bool}) (y : \text{num} \rightarrow \alpha \rightarrow \text{bool}). \text{mk\_rec}\ x = \text{mk\_rec}\ y \Rightarrow \text{ZRECSPACE}\ x \wedge \text{ZRECSPACE}\ y \Rightarrow x = y$                                                                                                    |
| $((p : \text{bool}) \Leftrightarrow (q : \text{bool}) \vee (r : \text{bool})) \Leftrightarrow (p \vee \neg q) \wedge (p \vee \neg r) \wedge (q \vee r \vee \neg p)$                                                                                                                                                                                      |
| $\forall (s : \alpha \rightarrow \text{bool}). (\exists (f : \text{num} \rightarrow \alpha). \text{BIJ}\ f\ \mathbb{U}(\text{num})\ s) \Leftrightarrow \text{BIJ}\ (\text{enumerate}\ s)\ \mathbb{U}(\text{num})\ s$                                                                                                                                     |
| $\text{LENGTH}\ (\text{TAKE}\ (n : \text{num})\ (xs : \alpha \text{ list})) = \text{if } n \leq \text{LENGTH}\ xs \text{ then } n \text{ else } \text{LENGTH}\ xs$                                                                                                                                                                                       |
| $(\forall (x : \alpha) (y : \alpha) (z : \alpha). (R : \alpha \rightarrow \alpha \rightarrow \text{bool})\ x\ y \wedge R\ y\ z \Rightarrow R\ x\ z) \Rightarrow \forall (x : \alpha \text{ list}) (y : \alpha \text{ list}) (z : \alpha \text{ list}). \text{LIST\_REL}\ R\ x\ y \wedge \text{LIST\_REL}\ R\ y\ z \Rightarrow \text{LIST\_REL}\ R\ x\ z$ |
| $\forall (h1 : \alpha) (h2 : \alpha). h1 = h2 \Rightarrow \forall (l1 : \alpha \text{ list}) (l2 : \alpha \text{ list}). l1 = l2 \Rightarrow h1::l1 = h2::l2$                                                                                                                                                                                            |
| $(\$SUBSET : (\alpha \rightarrow \text{bool}) \rightarrow (\alpha \rightarrow \text{bool}) \rightarrow \text{bool})^* = (\$SUBSET : (\alpha \rightarrow \text{bool}) \rightarrow (\alpha \rightarrow \text{bool}) \rightarrow \text{bool})$                                                                                                              |
| $(\forall (x : \alpha). x \in (s : \alpha \rightarrow \text{bool})) \Leftrightarrow s = \mathbb{U}(\alpha)$                                                                                                                                                                                                                                              |
| $\forall (n : \text{num}). \text{count}\ (\text{SUC}\ n) = n\ \text{INSERT}\ \text{count}\ n$                                                                                                                                                                                                                                                            |
| $\forall (xs : \alpha \text{ list}) (x : \alpha) (y : \alpha) (ys : \alpha \text{ list}). \text{LUPDATE}\ x\ (\text{LENGTH}\ xs)\ (xs\ ++\ y::ys) = xs\ ++\ x::ys$                                                                                                                                                                                       |
| $\forall (f : \alpha \rightarrow \beta) (s : \beta \rightarrow \text{bool}) (t : \beta \rightarrow \text{bool}). \text{PREIMAGE}\ f\ (s \cup t) = \text{PREIMAGE}\ f\ s \cup \text{PREIMAGE}\ f\ t$                                                                                                                                                      |
| $\forall (l : \alpha \text{ list}) (m : \text{num}). m = \text{LENGTH}\ l \Rightarrow \text{TAKE}\ m\ l = l$                                                                                                                                                                                                                                             |
| $\forall (s : \alpha \rightarrow \text{bool}). s \subseteq s$                                                                                                                                                                                                                                                                                            |
| $(f : \delta \rightarrow \gamma) \circ \text{UNCURRY}\ (g : \alpha \rightarrow \beta \rightarrow \delta) = \text{UNCURRY}\ ((\$o\ f : (\beta \rightarrow \delta) \rightarrow \beta \rightarrow \gamma) \circ g)$                                                                                                                                         |
| $\forall (t : \text{bool}). F \Rightarrow t \Leftrightarrow T$                                                                                                                                                                                                                                                                                           |
| $\forall (s : \text{num} \rightarrow \text{bool}). s \neq (\emptyset : \text{num} \rightarrow \text{bool}) \wedge \text{FINITE}\ s \Rightarrow \text{MIN\_SET}\ s \leq \text{MAX\_SET}\ s$                                                                                                                                                               |
| $\forall (s : \alpha \rightarrow \text{bool}). \text{SURJ}\ (\lambda (x : \alpha). x)\ s\ s$                                                                                                                                                                                                                                                             |
| $\forall (x : \alpha \rightarrow \text{bool}). \text{BIGUNION}\ \{x\} = x$                                                                                                                                                                                                                                                                               |
| $\forall (f : \beta \rightarrow \gamma) (g : \alpha \rightarrow \beta) (s : \alpha \rightarrow \text{bool}). \text{IMAGE}\ (f \circ g)\ s = \text{IMAGE}\ f\ (\text{IMAGE}\ g\ s)$                                                                                                                                                                       |
| $\forall (R1 : \alpha \rightarrow \beta \rightarrow \text{bool}) (R2 : \alpha \rightarrow \beta \rightarrow \text{bool}). R1 \subseteq_r R2 \wedge R2 \subseteq_r R1 \Rightarrow R1 = R2$                                                                                                                                                                |
| $\$!(\text{UNCURRY}\ (\lambda (x : \alpha). (P : \alpha \rightarrow \beta \rightarrow \text{bool})\ x)) \Leftrightarrow \forall (x : \alpha). \$!(P\ x)$                                                                                                                                                                                                 |
| $\forall (x : \alpha) (y : \alpha) (s : \alpha \rightarrow \text{bool}). (y\ \text{INSERT}\ s)\ x \Leftrightarrow x = y \vee x \in s$                                                                                                                                                                                                                    |
| $\forall (l : \alpha \text{ list}) (x : \alpha). \text{BUTLASTN}\ (\text{LENGTH}\ l)\ (x::l) = [x]$                                                                                                                                                                                                                                                      |
| $\text{SING}\ ((x : \alpha)\ \text{INSERT}\ (s : \alpha \rightarrow \text{bool})) \Leftrightarrow s = (\emptyset : \alpha \rightarrow \text{bool}) \vee s = \{x\}$                                                                                                                                                                                       |

|                                                                                                                                                                                                                                                                                                                                                                                                                                                                                                                                                                           |
|---------------------------------------------------------------------------------------------------------------------------------------------------------------------------------------------------------------------------------------------------------------------------------------------------------------------------------------------------------------------------------------------------------------------------------------------------------------------------------------------------------------------------------------------------------------------------|
| $\neg \text{LLEX } (R : \alpha \rightarrow \alpha \rightarrow \text{bool}) (l : \alpha \text{ list}) ([]) : \alpha \text{ list})$                                                                                                                                                                                                                                                                                                                                                                                                                                         |
| $\forall (P : \alpha \rightarrow \beta \rightarrow \text{bool}) (Q : \alpha \rightarrow \beta \rightarrow \text{bool}) (l1 : \alpha \text{ list}) (l2 : \beta \text{ list}). (\forall (x : \alpha \# \beta). \text{MEM } x (\text{ZIP } (l1, l2)) \wedge \text{UNCURRY } P \ x \Rightarrow \text{UNCURRY } Q \ x) \wedge \text{LIST\_REL } P \ l1 \ l2 \Rightarrow \text{LIST\_REL } Q \ l1 \ l2$                                                                                                                                                                         |
| $\forall (P : \alpha \rightarrow \text{bool}) (l : \alpha \text{ list}). \text{EXISTS } P (\text{REVERSE } l) \Leftrightarrow \text{EXISTS } P \ l$                                                                                                                                                                                                                                                                                                                                                                                                                       |
| $(l1 : \alpha \text{ list}) ++ (l2 : \alpha \text{ list}) = (h : \alpha)::(t : \alpha \text{ list}) \Leftrightarrow l1 = ([]) : \alpha \text{ list} \wedge l2 = h::t \vee \exists (lt : \alpha \text{ list}). l1 = h::lt \wedge t = lt ++ l2$                                                                                                                                                                                                                                                                                                                             |
| $(([]) : \alpha \text{ list}) \leq (l : \alpha \text{ list}) \Leftrightarrow T \wedge ((h : \alpha)::(t : \alpha \text{ list}) \leq ([]) : \alpha \text{ list}) \Leftrightarrow F \wedge ((h1 : \alpha)::(t1 : \alpha \text{ list}) \leq (h2 : \alpha)::(t2 : \alpha \text{ list}) \Leftrightarrow h1 = h2 \wedge t1 \leq t2)$                                                                                                                                                                                                                                            |
| $\neg((A : \text{bool}) \vee (B : \text{bool})) \Rightarrow F \Leftrightarrow \neg A \Rightarrow \neg B \Rightarrow F$                                                                                                                                                                                                                                                                                                                                                                                                                                                    |
| $\forall (f : \alpha \rightarrow \text{bool}) (l : \alpha \text{ list}). \text{FILTER } f (\text{FILTER } f \ l) = \text{FILTER } f \ l$                                                                                                                                                                                                                                                                                                                                                                                                                                  |
| $\forall (P : \alpha \rightarrow \text{bool}) (l : \alpha \text{ list}). \text{EXISTS } P \ l \Leftrightarrow \text{FOLDR } \$\sqrt{\ } F (\text{MAP } P \ l)$                                                                                                                                                                                                                                                                                                                                                                                                            |
| $\forall (R : \alpha \rightarrow \alpha \rightarrow \text{bool}). \text{irreflexive } R \wedge \text{transitive } R \Rightarrow \text{antisymmetric } R$                                                                                                                                                                                                                                                                                                                                                                                                                  |
| $(\forall (s : \alpha \rightarrow \text{bool}) (t : \alpha \rightarrow \text{bool}). s \subseteq s \cup t) \wedge \forall (s : \alpha \rightarrow \text{bool}) (t : \alpha \rightarrow \text{bool}). s \subseteq t \cup s$                                                                                                                                                                                                                                                                                                                                                |
| $\text{countable } \mathbb{U}(:\text{num})$                                                                                                                                                                                                                                                                                                                                                                                                                                                                                                                               |
| $\forall (a : \alpha \text{ list}) (b : \alpha \text{ list}) (c : \alpha \text{ list}). a ++ b \leq c \Rightarrow a \leq c$                                                                                                                                                                                                                                                                                                                                                                                                                                               |
| $\forall (r1 : \alpha \rightarrow \beta \text{ option}) (r2 : \alpha \rightarrow \beta \text{ option}) (\text{rows1} : (\alpha \rightarrow \beta \text{ option}) \text{ list}) (\text{rows2} : (\alpha \rightarrow \beta \text{ option}) \text{ list}) (\text{rows3} : (\alpha \rightarrow \beta \text{ option}) \text{ list}) (v : \alpha). (\text{IS\_SOME } (r2 \ v) \Rightarrow \text{IS\_SOME } (r1 \ v)) \Rightarrow \text{PMATCH } v (\text{rows1} ++ r1::\text{rows2} ++ r2::\text{rows3}) = \text{PMATCH } v (\text{rows1} ++ r1::\text{rows2} ++ \text{rows3})$ |
| $\text{INVOL } (\text{relinv} : (\alpha \rightarrow \alpha \rightarrow \text{bool}) \rightarrow \alpha \rightarrow \alpha \rightarrow \text{bool})$                                                                                                                                                                                                                                                                                                                                                                                                                       |
| $\forall (p : \alpha \rightarrow \beta) (g : \alpha \rightarrow \text{bool}) (i : \beta). (\forall (x1 : \alpha) (x2 : \alpha). g \ x1 \wedge g \ x2 \wedge p \ x1 = p \ x2 \Rightarrow x1 = x2) \Rightarrow \forall (x : \alpha). \text{PMATCH\_ROW\_COND } p \ g \ i \ x \Rightarrow (@ (y : \alpha). \text{PMATCH\_ROW\_COND } p \ g \ i \ y) = x$                                                                                                                                                                                                                     |
| $\forall (f : \text{num} \rightarrow \alpha) (s : \text{num} \rightarrow \text{bool}). \text{countable } (\text{IMAGE } f \ s)$                                                                                                                                                                                                                                                                                                                                                                                                                                           |
| $\forall (f : \alpha \rightarrow \beta \rightarrow \alpha) (e : \alpha) (l : \beta \text{ list}). \text{LENGTH } (\text{SCANL } f \ e \ l) = \text{SUC } (\text{LENGTH } l)$                                                                                                                                                                                                                                                                                                                                                                                              |
| $\forall (x : \alpha) (s : \alpha \rightarrow \text{bool}). \text{REST } s \ x \Leftrightarrow x \in s \wedge x \neq \text{CHOICE } s$                                                                                                                                                                                                                                                                                                                                                                                                                                    |
| $(\forall (x : \alpha) (y : \alpha). (R1 : \alpha \rightarrow \alpha \rightarrow \text{bool}) \ x \ y \Rightarrow (R2 : \alpha \rightarrow \alpha \rightarrow \text{bool}) \ x \ y) \wedge (\forall (x : \beta) (y : \beta). (R3 : \beta \rightarrow \beta \rightarrow \text{bool}) \ x \ y \Rightarrow (R4 : \beta \rightarrow \beta \rightarrow \text{bool}) \ x \ y) \Rightarrow (R1 \ \text{LEX } R3) \ (x : \alpha \# \beta) \ (y : \alpha \# \beta) \Rightarrow (R2 \ \text{LEX } R4) \ x \ y$                                                                      |
| $\forall (s : \alpha \rightarrow \text{bool}). \text{FINITE } s \Rightarrow \forall (t : \alpha \rightarrow \text{bool}). t \subset s \Rightarrow \text{FINITE } t$                                                                                                                                                                                                                                                                                                                                                                                                       |
| $\forall (r : \alpha \rightarrow \text{bool}) (s : \alpha \rightarrow \text{bool}) (t : \alpha \rightarrow \text{bool}). r \subseteq s \Rightarrow r \ \text{DIFF } s \cap t = r \ \text{DIFF } t$                                                                                                                                                                                                                                                                                                                                                                        |
| $\forall (R : \beta \rightarrow \beta \rightarrow \text{bool}) (f : \alpha \rightarrow \beta) (x : \alpha) (y : \alpha). \text{inv\_image } R \ f \ x \ y \Leftrightarrow R \ (f \ x) \ (f \ y)$                                                                                                                                                                                                                                                                                                                                                                          |
| $\text{COMPL } ((s : \alpha \rightarrow \text{bool}) \cup (t : \alpha \rightarrow \text{bool})) = \text{COMPL } s \cap \text{COMPL } t$                                                                                                                                                                                                                                                                                                                                                                                                                                   |
| $\forall (s : \alpha \rightarrow \text{bool}) (x : \alpha) (y : \alpha). (s \ \text{DELETE } y) \ x \Leftrightarrow x \in s \wedge x \neq y$                                                                                                                                                                                                                                                                                                                                                                                                                              |
| $\forall (y : \beta) (s : \alpha \rightarrow \text{bool}) (f : \alpha \rightarrow \beta). y \in \text{IMAGE } f \ s \Leftrightarrow \exists (x : \alpha). y = f \ x \wedge x \in s$                                                                                                                                                                                                                                                                                                                                                                                       |
| $(x : \alpha) \in \text{RDOM } (R : \alpha \rightarrow \beta \rightarrow \text{bool}) \Leftrightarrow \exists (y : \beta). R \ x \ y$                                                                                                                                                                                                                                                                                                                                                                                                                                     |
| $\forall (R : \alpha \rightarrow \alpha \rightarrow \text{bool}) (x : \alpha) (y : \alpha). R^{\circ} \ x \ y \Leftrightarrow x = y \vee R^+ \ x \ y$                                                                                                                                                                                                                                                                                                                                                                                                                     |
| $\forall (l1 : \alpha \text{ list}) (l2 : \alpha \text{ list}) (P : \alpha \rightarrow \text{bool}) (P' : \alpha \rightarrow \text{bool}). l1 = l2 \wedge (\forall (x : \alpha). \text{MEM } x \ l2 \Rightarrow (P \ x \Leftrightarrow P' \ x)) \Rightarrow (\text{EVERY } P \ l1 \Leftrightarrow \text{EVERY } P' \ l2)$                                                                                                                                                                                                                                                 |
| $\forall (m : \text{num}) (n : \text{num}). m < n \Rightarrow \text{EL } m \ (\text{COUNT\_LIST } n) = m$                                                                                                                                                                                                                                                                                                                                                                                                                                                                 |
| $\forall (c : \text{bool}) (x : \text{bool}). (\text{if } c \text{ then } T \text{ else } x) \Leftrightarrow \neg c \Rightarrow x$                                                                                                                                                                                                                                                                                                                                                                                                                                        |
| $\text{TAKE } (0 : \text{num}) (l : \alpha \text{ list}) = ([]) : \alpha \text{ list}$                                                                                                                                                                                                                                                                                                                                                                                                                                                                                    |
| $\forall (f : \alpha \rightarrow \beta \rightarrow \beta) (e : \beta) (x : \alpha). \text{FOLDR } f \ e \ [x] = f \ x \ e$                                                                                                                                                                                                                                                                                                                                                                                                                                                |
| $\forall (l : \alpha \text{ list}). \text{DROP } (\text{LENGTH } l) \ l = ([]) : \alpha \text{ list}$                                                                                                                                                                                                                                                                                                                                                                                                                                                                     |
| $\forall (e : \alpha) (s1 : \alpha \rightarrow \text{bool}) (s2 : \alpha \rightarrow \text{bool}). s1 \subseteq s2 \Rightarrow s1 \subseteq e \ \text{INSERT } s2$                                                                                                                                                                                                                                                                                                                                                                                                        |
| $\forall (P : \alpha \text{ list} \rightarrow \text{bool}). P ([]) : \alpha \text{ list} \wedge (\forall (t : \alpha \text{ list}). P \ t \Rightarrow \forall (h : \alpha). P \ (h::t)) \Rightarrow \forall (l : \alpha \text{ list}). P \ l$                                                                                                                                                                                                                                                                                                                             |

|                                                                                                                                                                                                                                                                                                                                                                                                                                                                                  |  |
|----------------------------------------------------------------------------------------------------------------------------------------------------------------------------------------------------------------------------------------------------------------------------------------------------------------------------------------------------------------------------------------------------------------------------------------------------------------------------------|--|
| $\neg T \Leftrightarrow F$                                                                                                                                                                                                                                                                                                                                                                                                                                                       |  |
| $(R : \alpha \rightarrow \alpha \rightarrow \text{bool})^+ (x : \alpha) (z : \alpha) \Leftrightarrow R \ x \ z \vee \exists (y : \alpha). R^+ \ x \ y \wedge R \ y \ z$                                                                                                                                                                                                                                                                                                          |  |
| $\forall (s : \alpha \rightarrow \text{bool}) (t : \alpha \rightarrow \text{bool}) (u : \alpha \rightarrow \text{bool}). s \subset t \wedge t \subseteq u \Rightarrow s \subset u$                                                                                                                                                                                                                                                                                               |  |
| $RC (\$PSUBSET : (\alpha \rightarrow \text{bool}) \rightarrow (\alpha \rightarrow \text{bool}) \rightarrow \text{bool}) = (\$SUBSET : (\alpha \rightarrow \text{bool}) \rightarrow (\alpha \rightarrow \text{bool}) \rightarrow \text{bool})$                                                                                                                                                                                                                                    |  |
| $\forall (x : \text{bool}) (x' : \text{bool}) (y : \text{bool}) (y' : \text{bool}). (\neg y \Rightarrow x \Rightarrow x') \wedge (\neg x' \Rightarrow y \Rightarrow y') \Rightarrow x \vee y \Rightarrow x' \vee y'$                                                                                                                                                                                                                                                             |  |
| $\forall (e : \alpha) (s : \alpha \rightarrow \text{bool}). \text{POW} (e \text{ INSERT } s) = \text{IMAGE} (\$INSERT \ e) (\text{POW } s) \cup \text{POW } s$                                                                                                                                                                                                                                                                                                                   |  |
| $\forall (s : \alpha \rightarrow \text{bool}). s \text{ DIFF } s = (\emptyset : \alpha \rightarrow \text{bool})$                                                                                                                                                                                                                                                                                                                                                                 |  |
| $\forall (x : \text{bool}) (x' : \text{bool}) (y : \text{bool}) (y' : \text{bool}). (x' \Rightarrow x) \wedge (x' \Rightarrow y \Rightarrow y') \Rightarrow (x \Rightarrow y) \Rightarrow x' \Rightarrow y'$                                                                                                                                                                                                                                                                     |  |
| $\forall (x : \alpha) (l : \alpha \text{ list}). \text{REVERSE} (\text{SNOC } x \ l) = x :: \text{REVERSE } l$                                                                                                                                                                                                                                                                                                                                                                   |  |
| $(\forall (x : \alpha). (P : \alpha \rightarrow \text{bool}) \ x \Rightarrow (P' : \alpha \rightarrow \text{bool}) \ x) \Rightarrow \text{OPTION\_ALL } P \ (\text{opt} : \alpha \text{ option}) \Rightarrow \text{OPTION\_ALL } P' \ \text{opt}$                                                                                                                                                                                                                                |  |
| $\forall (x : \alpha) (P : \alpha \rightarrow \text{bool}). x \in (\lambda (x : \alpha). P \ x) \Leftrightarrow P \ x$                                                                                                                                                                                                                                                                                                                                                           |  |
| $(\text{tri } (n : \text{num}) = (0 : \text{num})) \Leftrightarrow n = (0 : \text{num}) \wedge ((0 : \text{num}) = \text{tri } n \Leftrightarrow n = (0 : \text{num}))$                                                                                                                                                                                                                                                                                                          |  |
| $\text{REVERSE} ([ ] : \beta \text{ list}) = ([ ] : \beta \text{ list}) \wedge \forall (x : \alpha) (l : \alpha \text{ list}). \text{REVERSE} (x :: l) = \text{SNOC } x \ (\text{REVERSE } l)$                                                                                                                                                                                                                                                                                   |  |
| $\forall (l1 : \alpha \text{ list}) (l2 : \alpha \text{ list}). \neg \text{NULL } l1 \Rightarrow \text{ELL} (\text{LENGTH } l2) (l1 ++ l2) = \text{LAST } l1$                                                                                                                                                                                                                                                                                                                    |  |
| $\forall (x : \alpha) (l : \alpha \text{ list}). \text{LENGTH} (\text{SNOC } x \ l) = \text{SUC} (\text{LENGTH } l)$                                                                                                                                                                                                                                                                                                                                                             |  |
| $(\forall (f : \alpha \rightarrow \beta \rightarrow \gamma). \text{MAP2 } f ([ ] : \alpha \text{ list}) ([ ] : \beta \text{ list}) = ([ ] : \gamma \text{ list})) \wedge \forall (f : \delta \rightarrow \epsilon \rightarrow \zeta) (h1 : \delta) (t1 : \delta \text{ list}) (h2 : \epsilon) (t2 : \epsilon \text{ list}). \text{MAP2 } f (h1 :: t1) (h2 :: t2) = f \ h1 \ h2 :: \text{MAP2 } f \ t1 \ t2$                                                                      |  |
| $\forall (s : \alpha \rightarrow \text{bool}) (t : \beta \rightarrow \text{bool}) (f : \alpha \rightarrow \beta) (x : \alpha). f \in \text{FUNSET } s \ t \wedge x \in s \Rightarrow f \ x \in t$                                                                                                                                                                                                                                                                                |  |
| $\forall (s : \alpha \rightarrow \text{bool}) (t : \alpha \rightarrow \text{bool}). s \subseteq t \Leftrightarrow s \cup t = t$                                                                                                                                                                                                                                                                                                                                                  |  |
| $RC (R : \alpha \rightarrow \alpha \rightarrow \text{bool}) = R \cup_r (\$ = : \alpha \rightarrow \alpha \rightarrow \text{bool})$                                                                                                                                                                                                                                                                                                                                               |  |
| $\forall (f : \alpha \rightarrow \beta \rightarrow \gamma). \text{UNCURRY } f = (\lambda (x : \alpha \# \beta). f \ (\text{FST } x) \ (\text{SND } x))$                                                                                                                                                                                                                                                                                                                          |  |
| $\forall (l : \text{bool list}). \text{OR\_EL } l \Leftrightarrow \text{FOLD } \$ \vee \ F \ l$                                                                                                                                                                                                                                                                                                                                                                                  |  |
| $\forall (l1 : \alpha \text{ list}) (l2 : \alpha \text{ list}). \text{LENGTH } l1 = \text{LENGTH } l2 \wedge (\forall (x : \text{num}). x < \text{LENGTH } l1 \Rightarrow \text{EL } x \ l1 = \text{EL } x \ l2) \Rightarrow l1 = l2$                                                                                                                                                                                                                                            |  |
| $\forall (x : \alpha) (s : \alpha \rightarrow \text{bool}). x \in s \Rightarrow x \text{ INSERT } s = s$                                                                                                                                                                                                                                                                                                                                                                         |  |
| $\forall (P : \text{num} \rightarrow \text{bool}) (Q : \text{num} \rightarrow \text{bool}). \text{FINITE } P \wedge (P = (\emptyset : \text{num} \rightarrow \text{bool}) \Rightarrow Q \ (0 : \text{num})) \wedge (\forall (x : \text{num}). (\forall (y : \text{num}). y \in P \Rightarrow y \leq x) \wedge x \in P \Rightarrow Q \ x) \Rightarrow Q \ (\text{MAX\_SET } P)$                                                                                                   |  |
| $\forall (e : \alpha) (l : \alpha \text{ list}). \text{MEM} (\text{LAST } (e :: l)) (e :: l)$                                                                                                                                                                                                                                                                                                                                                                                    |  |
| $\forall (R : \alpha \rightarrow \alpha \rightarrow \text{bool}). R^{\star \star} = R^{\star}$                                                                                                                                                                                                                                                                                                                                                                                   |  |
| $\neg((p : \text{bool}) \Rightarrow (q : \text{bool})) \Rightarrow \neg q$                                                                                                                                                                                                                                                                                                                                                                                                       |  |
| $\forall (n : \text{num}) (ls : \alpha \text{ list}). n < \text{LENGTH } ls \Rightarrow \text{LUPDATE} (\text{EL } n \ ls) \ n \ ls = ls$                                                                                                                                                                                                                                                                                                                                        |  |
| $\forall (y : \text{bool}) (x : \text{bool}). \text{ASM\_MARKER } y \ x \Leftrightarrow x$                                                                                                                                                                                                                                                                                                                                                                                       |  |
| $\forall (x : \text{num}) (l : \text{num list}). \text{SUM} (\text{SNOC } x \ l) = \text{SUM } l + x$                                                                                                                                                                                                                                                                                                                                                                            |  |
| $\forall (R : \alpha \rightarrow \alpha \rightarrow \text{bool}). \text{StrongOrder } R \Rightarrow \text{STRORD} (RC \ R) = R$                                                                                                                                                                                                                                                                                                                                                  |  |
| $\forall (l1 : \alpha \text{ list}) (l2 : \alpha \text{ list}) (l3 : \alpha \text{ list}). (\forall (n : \text{num}). n < \text{LENGTH } l1 \wedge (R : \alpha \rightarrow \alpha \rightarrow \text{bool}) (\text{EL } n \ l1) (\text{EL } n \ l2) \wedge R (\text{EL } n \ l2) (\text{EL } n \ l3)) \Rightarrow R (\text{EL } n \ l1) (\text{EL } n \ l3)) \wedge \text{LIST\_REL } R \ l1 \ l2 \wedge \text{LIST\_REL } R \ l2 \ l3 \Rightarrow \text{LIST\_REL } R \ l1 \ l3$ |  |
| $\forall (P : \alpha \rightarrow \beta) (v : \gamma). P \ (\text{PMATCH } v ([ ] : (\gamma \rightarrow \alpha \text{ option}) \text{ list})) = P \ (\text{ARB} : \alpha)$                                                                                                                                                                                                                                                                                                        |  |
| $\forall (s : \alpha \rightarrow \text{bool}) (t : \alpha \rightarrow \text{bool}). \text{INFINITE } s \wedge \text{FINITE } t \Rightarrow \exists (x : \alpha). x \in s \wedge x \notin t$                                                                                                                                                                                                                                                                                      |  |
| $\forall (v : \alpha) (\text{rows} : (\alpha \rightarrow \beta \text{ option}) \text{ list}) (n : \text{num}). n < \text{LENGTH } \text{rows} \wedge \text{IS\_SOME} (\text{EL } n \ \text{rows } v) \Rightarrow \text{PMATCH } v \ \text{rows} = \text{PMATCH } v \ (\text{TAKE} (\text{SUC } n) \ \text{rows})$                                                                                                                                                                |  |

|                                                                                                                                                                                                                                                                                                                                                                                                                                                                                     |
|-------------------------------------------------------------------------------------------------------------------------------------------------------------------------------------------------------------------------------------------------------------------------------------------------------------------------------------------------------------------------------------------------------------------------------------------------------------------------------------|
| $\forall (f : \alpha \rightarrow \beta) (ls : \alpha \text{ list}). \text{ALL\_DISTINCT} (\text{MAP } f \text{ } ls) \Rightarrow \text{ALL\_DISTINCT } ls$                                                                                                                                                                                                                                                                                                                          |
| $(\forall (x : \alpha). \text{LAST } [x] = x) \wedge \forall (h1 : \beta) (h2 : \beta) (t : \beta \text{ list}). \text{LAST } (h1::h2::t) = \text{LAST } (h2::t)$                                                                                                                                                                                                                                                                                                                   |
| $\forall (s : \alpha \rightarrow \text{bool}). \text{FINITE} (\text{REST } s) \Leftrightarrow \text{FINITE } s$                                                                                                                                                                                                                                                                                                                                                                     |
| $\forall (x : \text{bool}) (x' : \text{bool}) (y : \text{bool}) (y' : \text{bool}). (\neg y \Rightarrow x' \Rightarrow x) \wedge (\neg x' \Rightarrow y' \Rightarrow y) \Rightarrow x' \vee y' \Rightarrow x \vee y$                                                                                                                                                                                                                                                                |
| $\text{PMATCH\_ROW\_COND} (\text{pat} : \alpha \rightarrow \beta) (\text{guard} : \alpha \rightarrow \text{bool}) (\text{inp} : \beta) (v : \alpha) \Leftrightarrow \text{inp} = \text{pat } v \wedge \text{guard } v$                                                                                                                                                                                                                                                              |
| $\forall (l : \alpha \text{ list}). \text{NULL } l \Leftrightarrow \text{FOLDER } (\lambda (x : \alpha) (l' : \text{bool}). F) T l$                                                                                                                                                                                                                                                                                                                                                 |
| $(0 : \text{num}) < (n : \text{num}) \Rightarrow \text{TAKE } n ((x : \alpha)::xs : \alpha \text{ list}) = x::\text{TAKE } (n - (1 : \text{num})) xs$                                                                                                                                                                                                                                                                                                                               |
| $\text{COUNT\_LIST } (0 : \text{num}) = ([] : \text{num list}) \wedge \forall (n : \text{num}). \text{COUNT\_LIST } (\text{SUC } n) = \text{SNOC } n (\text{COUNT\_LIST } n)$                                                                                                                                                                                                                                                                                                       |
| $\forall (x : \alpha) (l : \alpha \text{ list}). ([] : \alpha \text{ list}) \neq \text{SNOC } x l$                                                                                                                                                                                                                                                                                                                                                                                  |
| $\text{IDEM } (\text{RTC} : (\alpha \rightarrow \alpha \rightarrow \text{bool}) \rightarrow \alpha \rightarrow \alpha \rightarrow \text{bool})$                                                                                                                                                                                                                                                                                                                                     |
| $\forall (v\_old : \alpha) (v\_new : \beta). \text{PMATCH } v\_old ([] : (\alpha \rightarrow \gamma \text{ option}) \text{ list}) = \text{PMATCH } v\_new ([] : (\beta \rightarrow \gamma \text{ option}) \text{ list})$                                                                                                                                                                                                                                                            |
| $\text{OPTION\_GUARD } (b : \text{bool}) = \text{if } b \text{ then SOME } () \text{ else (NONE : unit option)}$                                                                                                                                                                                                                                                                                                                                                                    |
| $(\forall (\text{opt} : \alpha \text{ option}). (P : \alpha \text{ option} \rightarrow \text{bool}) \text{ opt}) \Leftrightarrow P (\text{NONE} : \alpha \text{ option}) \wedge \forall (x : \alpha). P (\text{SOME } x)$                                                                                                                                                                                                                                                           |
| $\forall (x : \alpha) (y : \alpha) (s : \alpha \rightarrow \text{bool}). x \text{ INSERT } y \text{ INSERT } s = y \text{ INSERT } x \text{ INSERT } s$                                                                                                                                                                                                                                                                                                                             |
| $\forall (f : \alpha \rightarrow \beta) (s : \alpha \rightarrow \text{bool}) (t : \beta \rightarrow \text{bool}). \text{BIJ } f s t \wedge \text{FINITE } s \Rightarrow \text{FINITE } t$                                                                                                                                                                                                                                                                                           |
| $\forall (s : \alpha \rightarrow \text{bool}). (\emptyset : \alpha \rightarrow \text{bool}) \text{ DIFF } s = (\emptyset : \alpha \rightarrow \text{bool})$                                                                                                                                                                                                                                                                                                                         |
| $\forall (M : \alpha \text{ list}) (N : \alpha \text{ list}) (f : \alpha \rightarrow \text{num}) (f' : \alpha \rightarrow \text{num}). M = N \wedge (\forall (x : \alpha). \text{MEM } x N \Rightarrow f x = f' x) \Rightarrow \text{list\_size } f M = \text{list\_size } f' N$                                                                                                                                                                                                    |
| $\forall (m : \text{num}) (l : \alpha \text{ list}). m \leq \text{LENGTH } l \Rightarrow \forall (n : \text{num}). n \leq m \Rightarrow \text{TAKE } n (\text{TAKE } m l) = \text{TAKE } n l$                                                                                                                                                                                                                                                                                       |
| $\forall (s : \alpha \rightarrow \text{bool}) (t : \alpha \rightarrow \text{bool}). s \subseteq t \Rightarrow \forall (f : \alpha \rightarrow \beta). \text{IMAGE } f s \subseteq \text{IMAGE } f t$                                                                                                                                                                                                                                                                                |
| $\forall (s : \alpha \rightarrow \text{bool}) (t : \beta \rightarrow \text{bool}). (\exists (f : \alpha \rightarrow \beta). \text{SURJ } f s t) \Rightarrow \exists (g : \beta \rightarrow \alpha). \text{INJ } g t s$                                                                                                                                                                                                                                                              |
| $\forall (f : \text{num} \rightarrow \alpha) (n : \text{num}). \text{LENGTH } (\text{GENLIST } f n) = n$                                                                                                                                                                                                                                                                                                                                                                            |
| $\text{IDEM } (\text{TC} : (\alpha \rightarrow \alpha \rightarrow \text{bool}) \rightarrow \alpha \rightarrow \alpha \rightarrow \text{bool})$                                                                                                                                                                                                                                                                                                                                      |
| $\forall (f : \alpha \rightarrow \alpha \rightarrow \alpha). \text{ASSOC } f \Rightarrow \forall (e : \alpha). \text{LEFT\_ID } f e \Rightarrow \forall (l : \alpha \text{ list list}). \text{FOLDER } f e (\text{FLAT } l) = \text{FOLDER } f e (\text{MAP } (\text{FOLDER } f e) l)$                                                                                                                                                                                              |
| $\forall (l : \alpha \text{ list}). \text{IS\_SUFFIX } l l$                                                                                                                                                                                                                                                                                                                                                                                                                         |
| $\forall (h1 : \alpha) (h2 : \alpha). h1 \neq h2 \Rightarrow \forall (l1 : \alpha \text{ list}) (l2 : \alpha \text{ list}). h1::l1 \neq h2::l2$                                                                                                                                                                                                                                                                                                                                     |
| $\forall (P : \beta \rightarrow \text{bool}) (f : \alpha \rightarrow \beta) (l : \alpha \text{ list}). \text{EVERY } P (\text{MAP } f l) \Leftrightarrow \text{EVERY } (\lambda (x : \alpha). P (f x)) l$                                                                                                                                                                                                                                                                           |
| $\forall (l1 : \alpha \text{ list}) (l2 : \alpha \text{ list}) (n : \text{num}) (x : \alpha). \text{LENGTH } l1 \leq n \Rightarrow \text{LUPDATE } x n (l1 ++ l2) = l1 ++ \text{LUPDATE } x (n - \text{LENGTH } l1) l2$                                                                                                                                                                                                                                                             |
| $\{x \mid (P : \alpha \rightarrow \text{bool}) x\} = P$                                                                                                                                                                                                                                                                                                                                                                                                                             |
| $\forall (x : \alpha) (s : \alpha \rightarrow \text{bool}) (t : \alpha \rightarrow \text{bool}). x \text{ INSERT } s \subseteq t \Leftrightarrow x \in t \wedge s \subseteq t$                                                                                                                                                                                                                                                                                                      |
| $\forall (t : \text{bool}). t \Rightarrow T$                                                                                                                                                                                                                                                                                                                                                                                                                                        |
| $(\forall (x : \alpha) (y : \beta). (R1 : \alpha \rightarrow \beta \rightarrow \text{bool}) x y \Rightarrow (R2 : \beta \rightarrow \alpha \rightarrow \text{bool}) y x) \Rightarrow \forall (x : \alpha \text{ list}) (y : \beta \text{ list}). \text{LIST\_REL } R1 x y \Rightarrow \text{LIST\_REL } R2 y x$                                                                                                                                                                     |
| $\forall (l : \alpha \text{ list}). \neg \text{NULL } l \Rightarrow \text{ELL } (0 : \text{num}) l = \text{LAST } l$                                                                                                                                                                                                                                                                                                                                                                |
| $\forall (v : \alpha) (\text{rows} : (\alpha \rightarrow \beta \text{ option}) \text{ list}) (i : \text{num}). i < \text{LENGTH } \text{rows} \Rightarrow (\text{EL } i (\text{STRONGEST\_REDUNDANT\_ROWS\_INFO } v \text{ rows}) \Leftrightarrow \text{EVERY } (\lambda (r : \alpha \rightarrow \beta \text{ option}). r v = (\text{NONE} : \beta \text{ option})) (\text{TAKE } i \text{ rows}) \Rightarrow \text{EL } i \text{ rows } v = (\text{NONE} : \beta \text{ option}))$ |
| $\text{UNCURRY } (f : \alpha \rightarrow \beta \rightarrow \gamma) = \text{UNCURRY } (g : \alpha \rightarrow \beta \rightarrow \gamma) \Leftrightarrow f = g$                                                                                                                                                                                                                                                                                                                       |

|                                                                                                                                                                                                                                                                                                                                                                                                                                                                                                                                    |
|------------------------------------------------------------------------------------------------------------------------------------------------------------------------------------------------------------------------------------------------------------------------------------------------------------------------------------------------------------------------------------------------------------------------------------------------------------------------------------------------------------------------------------|
| $\text{PMATCH\_ROW\_COND\_NOT\_EX\_OR\_EQ } (i : \alpha) (r : \alpha \rightarrow \beta \text{ option}) ([ ] : (\alpha \rightarrow \beta \text{ option}) \text{ list}) \Leftrightarrow r \neq (\text{NONE} : \beta \text{ option}) \Rightarrow F$                                                                                                                                                                                                                                                                                   |
| $\forall (s : \alpha \rightarrow \text{bool}) (t : \alpha \rightarrow \text{bool}) (u : \alpha \rightarrow \text{bool}). s \subseteq t \cap u \Leftrightarrow s \subseteq t \wedge s \subseteq u$                                                                                                                                                                                                                                                                                                                                  |
| $\forall (P : \alpha \rightarrow \text{bool}) (v : \beta) (\text{rows} : (\beta \rightarrow \alpha \text{ option}) \text{ list}). P (\text{PMATCH } v \text{ rows}) \Leftrightarrow \text{PMATCH\_EXPAND\_PRED } P \ v \ ([ ] : (\beta \rightarrow \alpha \text{ option}) \text{ list}) \text{ rows}$                                                                                                                                                                                                                              |
| $\text{nsnd } (0 : \text{num}) = (0 : \text{num})$                                                                                                                                                                                                                                                                                                                                                                                                                                                                                 |
| $\forall (l : \alpha \text{ list}) (m : \text{num}). m = \text{LENGTH } l \Rightarrow \text{DROP } m \ l = ([ ] : \alpha \text{ list})$                                                                                                                                                                                                                                                                                                                                                                                            |
| $\forall (x : \alpha) (s : \alpha \rightarrow \text{bool}). x \in s \wedge (\forall (y : \alpha). y \in s \Rightarrow x = y) \Leftrightarrow s = \{x\}$                                                                                                                                                                                                                                                                                                                                                                            |
| $(\exists (p : \alpha \# \beta). (P : \alpha \rightarrow \beta \rightarrow \text{bool}) (\text{FST } p) (\text{SND } p)) \Leftrightarrow \exists (p1 : \alpha) (p2 : \beta). P \ p1 \ p2$                                                                                                                                                                                                                                                                                                                                          |
| $([ ] : \alpha \text{ list}) \in \text{common\_prefixes } (s : \alpha \text{ list} \rightarrow \text{bool})$                                                                                                                                                                                                                                                                                                                                                                                                                       |
| $\forall (P : \beta \rightarrow \text{bool}) (f : \alpha \rightarrow \beta) (l : \alpha \text{ list}). \text{EXISTS } P (\text{MAP } f \ l) \Leftrightarrow \text{EXISTS } (\lambda (x : \alpha). P \ (f \ x)) \ l$                                                                                                                                                                                                                                                                                                                |
| $\forall (x : \alpha). (\text{NONE} : \alpha \text{ option}) \neq \text{SOME } x$                                                                                                                                                                                                                                                                                                                                                                                                                                                  |
| $\forall (f : \alpha \rightarrow \beta) (R : \alpha \rightarrow \alpha \rightarrow \text{bool}) (y : \alpha) (z : \alpha). R \ y \ z \Rightarrow \text{RESTRICT } f \ R \ z \ y = f \ y$                                                                                                                                                                                                                                                                                                                                           |
| $\forall (x : \alpha) (y : \alpha). \text{SOME } x = \text{SOME } y \Leftrightarrow x = y$                                                                                                                                                                                                                                                                                                                                                                                                                                         |
| $\forall (s : \alpha \rightarrow \text{bool}). \text{DISJOINT } (\emptyset : \alpha \rightarrow \text{bool}) \ s \wedge \text{DISJOINT } s \ (\emptyset : \alpha \rightarrow \text{bool})$                                                                                                                                                                                                                                                                                                                                         |
| $(\forall (s : \alpha \rightarrow \text{bool}) (t : \alpha \rightarrow \text{bool}). s \cup (t \text{ DIFF } s) = s \cup t) \wedge \forall (s : \alpha \rightarrow \text{bool}) (t : \alpha \rightarrow \text{bool}). t \text{ DIFF } s \cup s = t \cup s$                                                                                                                                                                                                                                                                         |
| $\text{DATATYPE } ((\text{option} : \alpha \text{ option} \rightarrow (\alpha \rightarrow \alpha \text{ option}) \rightarrow \beta) (\text{NONE} : \alpha \text{ option}) (\text{SOME} : \alpha \rightarrow \alpha \text{ option}))$                                                                                                                                                                                                                                                                                               |
| $\forall (s : \alpha \rightarrow \text{bool}) (t : \alpha \rightarrow \text{bool}). s \subseteq t \wedge t \subseteq s \Rightarrow s = t$                                                                                                                                                                                                                                                                                                                                                                                          |
| $\forall (s : \alpha \rightarrow \text{bool}) (t : \alpha \rightarrow \text{bool}) (u : \alpha \rightarrow \text{bool}). s \cup t \cap u = (s \cup t) \cap (s \cup u)$                                                                                                                                                                                                                                                                                                                                                             |
| $\forall (l : \alpha \text{ list}). (0 : \text{num}) < \text{LENGTH } l \Leftrightarrow \neg \text{NULL } l$                                                                                                                                                                                                                                                                                                                                                                                                                       |
| $\forall (P : \alpha \rightarrow \text{bool}) (Q : \alpha \rightarrow \text{bool}). (\forall (x : \alpha). P \ x \Rightarrow Q \ x) \Rightarrow \forall (l : \alpha \text{ list}). \text{EVERY } P \ l \Rightarrow \text{EVERY } Q \ l$                                                                                                                                                                                                                                                                                            |
| $\forall (p : \text{num} \rightarrow \text{bool}). (\exists (n : \text{num}). p \ n) \Rightarrow p \ (\$ \text{LEAST } p) \wedge \forall (n : \text{num}). n < \$ \text{LEAST } p \Rightarrow \neg p \ n$                                                                                                                                                                                                                                                                                                                          |
| $\forall (s : \alpha \rightarrow \text{bool}) (t : \alpha \rightarrow \text{bool}) (u : \alpha \rightarrow \text{bool}). (\text{DISJOINT } (s \cup t) \ u \Leftrightarrow \text{DISJOINT } s \ u \wedge \text{DISJOINT } t \ u) \wedge (\text{DISJOINT } u \ (s \cup t) \Leftrightarrow \text{DISJOINT } s \ u \wedge \text{DISJOINT } t \ u)$                                                                                                                                                                                     |
| $\forall (xs : \alpha \text{ list}) (h : \alpha) (i : \text{num}). (P : \alpha \rightarrow \text{bool}) \ h \wedge \text{EVERY } P \ xs \Rightarrow \text{EVERY } P \ (\text{LUPDATE } h \ i \ xs)$                                                                                                                                                                                                                                                                                                                                |
| $\forall (P : (\alpha \rightarrow \text{bool}) \rightarrow \text{bool}). (\text{BIGUNION } P = (\emptyset : \alpha \rightarrow \text{bool}) \Leftrightarrow P = (\emptyset : (\alpha \rightarrow \text{bool}) \rightarrow \text{bool}) \vee P = \{(\emptyset : \alpha \rightarrow \text{bool})\}) \wedge ((\emptyset : \alpha \rightarrow \text{bool}) = \text{BIGUNION } P \Leftrightarrow P = (\emptyset : (\alpha \rightarrow \text{bool}) \rightarrow \text{bool}) \vee P = \{(\emptyset : \alpha \rightarrow \text{bool})\})$ |
| $(x : \alpha \rightarrow \text{bool}) \cap \text{COMPL } x = (\emptyset : \alpha \rightarrow \text{bool}) \wedge \text{COMPL } x \cap x = (\emptyset : \alpha \rightarrow \text{bool})$                                                                                                                                                                                                                                                                                                                                            |
| $\text{TAKE } (n : \text{num}) \ (l : \alpha \text{ list}) = ([ ] : \alpha \text{ list}) \Leftrightarrow n = (0 : \text{num}) \vee l = ([ ] : \alpha \text{ list})$                                                                                                                                                                                                                                                                                                                                                                |
| $\text{APPLY\_REDUNDANT\_ROWS\_INFO } ([ ] : \text{bool list}) ([ ] : \alpha \text{ list}) = ([ ] : \alpha \text{ list}) \wedge (\forall (is : \text{bool list}) (x : \beta) (xs : \beta \text{ list}). \text{APPLY\_REDUNDANT\_ROWS\_INFO } (T :: is) (x :: xs) = \text{APPLY\_REDUNDANT\_ROWS\_INFO } is \ xs \wedge \forall (is : \text{bool list}) (x : \gamma) (xs : \gamma \text{ list}). \text{APPLY\_REDUNDANT\_ROWS\_INFO } (F :: is) (x :: xs) = x :: \text{APPLY\_REDUNDANT\_ROWS\_INFO } is \ xs)$                     |
| $\forall (s : \alpha \rightarrow \text{bool}) (t : \alpha \rightarrow \text{bool}) (u : \alpha \rightarrow \text{bool}). s \cap (t \cup u) = s \cap t \cup s \cap u$                                                                                                                                                                                                                                                                                                                                                               |
| $\forall (n : \text{num}) (f : \text{num} \rightarrow \alpha) (m : \text{num}). n < m \Rightarrow \text{EL } n \ (\text{MAP } f \ (\text{COUNT\_LIST } m)) = f \ n$                                                                                                                                                                                                                                                                                                                                                                |
| $\forall (x : \alpha + \beta). \neg \text{ISR } x \Leftrightarrow \text{ISL } x$                                                                                                                                                                                                                                                                                                                                                                                                                                                   |
| $\forall (R : \alpha \rightarrow \alpha \rightarrow \text{bool}) (x : \alpha) (y : \alpha). R \ x \ y \Rightarrow R^{\wedge} = x \ y$                                                                                                                                                                                                                                                                                                                                                                                              |
| $\forall (l : \alpha \text{ list}) (n : \text{num}). \text{LENGTH } l \leq n \Rightarrow \text{TAKE } n \ l = l$                                                                                                                                                                                                                                                                                                                                                                                                                   |
| $\forall (R : \alpha \rightarrow \beta \rightarrow \text{bool}). R^{T^T} = R$                                                                                                                                                                                                                                                                                                                                                                                                                                                      |
| $\forall (R : \alpha \rightarrow \alpha \rightarrow \text{bool}). R^{+^+} = R^+$                                                                                                                                                                                                                                                                                                                                                                                                                                                   |

|                                                                                                                                                                                                                                                                                                                                                                                                                                                    |
|----------------------------------------------------------------------------------------------------------------------------------------------------------------------------------------------------------------------------------------------------------------------------------------------------------------------------------------------------------------------------------------------------------------------------------------------------|
| $\forall(x:\alpha) (f:\alpha \rightarrow \text{num} \rightarrow \alpha). \text{PRIM\_REC } x \ f \ (0:\text{num}) = x \wedge \forall(m:\text{num}). \text{PRIM\_REC } x \ f \ (\text{SUC } m) = f \ (\text{PRIM\_REC } x \ f \ m) \ m$                                                                                                                                                                                                             |
| $\forall(l1:\alpha \text{ list}) (l2:\alpha \text{ list}) (l:\alpha \text{ list}). \text{IS\_SUFFIX } l2 \ l \Rightarrow \text{IS\_SUFFIX } (l1 ++ l2) \ l$                                                                                                                                                                                                                                                                                        |
| $\forall(x:\alpha) (f:\beta \rightarrow \alpha \rightarrow \text{bool}) (s:\beta \rightarrow \text{bool}). x \in \text{BIGINTER } (\text{IMAGE } f \ s) \Leftrightarrow \forall(y:\beta). y \in s \Rightarrow x \in f \ y$                                                                                                                                                                                                                         |
| $\forall(x:\alpha). x \ \text{INSERT} \ \mathbb{U}(:\alpha) = \mathbb{U}(:\alpha)$                                                                                                                                                                                                                                                                                                                                                                 |
| $\text{OPTION\_MAP2 } (f:\alpha \rightarrow \beta \rightarrow \gamma) (o1:\alpha \text{ option}) (o2:\beta \text{ option}) = \text{SOME } (v:\gamma) \Leftrightarrow \exists(x1:\alpha) (x2:\beta). o1 = \text{SOME } x1 \wedge o2 = \text{SOME } x2 \wedge v = f \ x1 \ x2$                                                                                                                                                                       |
| $(\forall(s:\alpha). (P:\alpha \rightarrow \text{bool}) \ s \Leftrightarrow (Q:\alpha \rightarrow \text{bool}) \ s) \Rightarrow ((\exists(s:\alpha). P \ s) \Leftrightarrow \exists(s:\alpha). Q \ s)$                                                                                                                                                                                                                                             |
| $\text{reflexive } (R:\alpha \rightarrow \alpha \rightarrow \text{bool})^{\wedge} =$                                                                                                                                                                                                                                                                                                                                                               |
| $\forall(f:\alpha \rightarrow \beta) (ls:\alpha \text{ list}) (a:\beta \text{ list}). \text{FOLDR } (\lambda(x:\alpha) (y:\beta \text{ list}). f \ x::y) \ a \ ls = \text{MAP } f \ ls ++ a$                                                                                                                                                                                                                                                       |
| $\text{INJ } (f:\alpha \rightarrow \beta) (s:\alpha \rightarrow \text{bool}) (t:\beta \rightarrow \text{bool}) \Leftrightarrow (\forall(x:\alpha). x \in s \Rightarrow f \ x \in t) \wedge \forall(x:\alpha) (y:\alpha). x \in s \wedge y \in s \Rightarrow (f \ x = f \ y \Leftrightarrow x = y)$                                                                                                                                                 |
| $\forall(s:\alpha \rightarrow \text{bool}). \text{IMAGE } (\lambda(x:\alpha). x) \ s = s$                                                                                                                                                                                                                                                                                                                                                          |
| $(R:\alpha \rightarrow \alpha \rightarrow \text{bool})^{\star} (x:\alpha) \ x$                                                                                                                                                                                                                                                                                                                                                                     |
| $\forall(l:\alpha \text{ list}) (l':\alpha \text{ list}) (b:\beta) (b':\beta) (f:\beta \rightarrow \alpha \rightarrow \beta) (f':\beta \rightarrow \alpha \rightarrow \beta). l = l' \wedge b = b' \wedge (\forall(x:\alpha) (a:\beta). \text{MEM } x \ l' \Rightarrow f \ a \ x = f' \ a \ x) \Rightarrow \text{FOLDL } f \ b \ l = \text{FOLDL } f' \ b' \ l'$                                                                                   |
| $\forall(x:\alpha) (f:\alpha \rightarrow \alpha) (g1:\text{num} \rightarrow \alpha) (g2:\text{num} \rightarrow \alpha) (m1:\text{num}) (m2:\text{num}). \text{SIMP\_REC\_REL } g1 \ x \ f \ m1 \wedge \text{SIMP\_REC\_REL } g2 \ x \ f \ m2 \Rightarrow \forall(n:\text{num}). n < m1 \wedge n < m2 \Rightarrow g1 \ n = g2 \ n$                                                                                                                  |
| $\forall(P:\alpha \rightarrow \text{bool}) (l:\alpha \text{ list list}). \text{FILTER } P \ (\text{FLAT } l) = \text{FLAT } (\text{MAP } (\text{FILTER } P) \ l)$                                                                                                                                                                                                                                                                                  |
| $\forall(s:\alpha \text{ list}) (h:\alpha) (t:\alpha \text{ list}). \text{IS\_SUFFIX } s \ (h::t) \Rightarrow \text{IS\_SUFFIX } s \ t$                                                                                                                                                                                                                                                                                                            |
| $\forall(P:\alpha \rightarrow \text{bool}) (s:(\alpha \rightarrow \text{bool}) \rightarrow \text{bool}). (\forall(x:\alpha). x \in \text{BIGUNION } s \Rightarrow P \ x) \Leftrightarrow \forall(t:\alpha \rightarrow \text{bool}) (x:\alpha). t \in s \wedge x \in t \Rightarrow P \ x$                                                                                                                                                           |
| $\forall(t:\text{bool}). F \wedge t \Leftrightarrow F$                                                                                                                                                                                                                                                                                                                                                                                             |
| $\forall(P:\alpha \rightarrow \text{bool}) (l:\alpha \text{ list}). \text{FILTER } P \ l \neq l \Leftrightarrow \exists(x:\alpha). \text{MEM } x \ l \wedge \neg P \ x$                                                                                                                                                                                                                                                                            |
| $(x:\alpha \text{ list}) \neq ([]) : \alpha \text{ list} \Leftrightarrow (0:\text{num}) < \text{LENGTH } x$                                                                                                                                                                                                                                                                                                                                        |
| $\forall(y:\alpha) (x:\alpha) (l:\alpha \text{ list}). \text{MEM } y \ (\text{SNOC } x \ l) \Leftrightarrow y = x \vee \text{MEM } y \ l$                                                                                                                                                                                                                                                                                                          |
| $\text{SUM\_SET } (\emptyset:\text{num} \rightarrow \text{bool}) = (0:\text{num})$                                                                                                                                                                                                                                                                                                                                                                 |
| $\text{MAP } (\lambda(x:\alpha). x) (l:\alpha \text{ list}) = l \wedge \text{MAP } (l:\alpha \rightarrow \alpha) \ l = l$                                                                                                                                                                                                                                                                                                                          |
| $\forall(s:\alpha \rightarrow \text{bool}) (t:\alpha \rightarrow \text{bool}). s \subseteq t \wedge \text{countable } t \Rightarrow \text{countable } s$                                                                                                                                                                                                                                                                                           |
| $\{x \mid F\} = (\emptyset:\alpha \rightarrow \text{bool})$                                                                                                                                                                                                                                                                                                                                                                                        |
| $\forall(f:\alpha \rightarrow \beta) (s:\alpha \rightarrow \text{bool}). s \subseteq \text{PREIMAGE } f \ (\text{IMAGE } f \ s)$                                                                                                                                                                                                                                                                                                                   |
| $\forall(x:\alpha) (s:\alpha \rightarrow \text{bool}) (t:\alpha \rightarrow \text{bool}). \text{DISJOINT } t \ (x \ \text{INSERT } s) \Leftrightarrow \text{DISJOINT } t \ s \wedge x \notin t$                                                                                                                                                                                                                                                    |
| $\forall(x:\alpha) (s:\alpha \rightarrow \text{bool}) (t:\alpha \rightarrow \text{bool}). (x \ \text{INSERT } s) \cup t = \text{if } x \in t \text{ then } s \cup t \text{ else } x \ \text{INSERT } s \cup t$                                                                                                                                                                                                                                     |
| $\forall(R:\alpha \rightarrow \alpha \rightarrow \text{bool}). (\forall(x:\alpha). R^{\star} \ x \ x) \wedge \forall(x:\alpha) (y:\alpha) (z:\alpha). R^{\star} \ x \ y \wedge R \ y \ z \Rightarrow R^{\star} \ x \ z$                                                                                                                                                                                                                            |
| $\forall(s:\text{num} \rightarrow \text{bool}) (t:\text{num} \rightarrow \text{bool}). \text{FINITE } t \wedge s \subseteq t \Rightarrow \text{SUM\_SET } s \leq \text{SUM\_SET } t$                                                                                                                                                                                                                                                               |
| $\forall(x:\alpha \text{ list}) (l:\alpha \text{ list list}). \text{FLAT } (\text{SNOC } x \ l) = \text{FLAT } l ++ x$                                                                                                                                                                                                                                                                                                                             |
| $\forall(f:\alpha \rightarrow \beta) (P:\alpha \rightarrow \text{bool}) (Q:\beta \rightarrow \text{bool}). f \in \text{FUNSET } P \ Q \Leftrightarrow \forall(x:\alpha). x \in P \Rightarrow f \ x \in Q$                                                                                                                                                                                                                                          |
| $\forall(v:\alpha) (\text{rows1}:(\alpha \rightarrow \beta \text{ option}) \text{ list}) (\text{rows2}:(\alpha \rightarrow \beta \text{ option}) \text{ list}) (\text{rows3}:(\alpha \rightarrow \beta \text{ option}) \text{ list}). \text{PMATCH\_EQUIV\_ROWS } v \ \text{rows1} \ \text{rows2} \Rightarrow \text{PMATCH\_EQUIV\_ROWS } v \ \text{rows2} \ \text{rows3} \Rightarrow \text{PMATCH\_EQUIV\_ROWS } v \ \text{rows1} \ \text{rows3}$ |
| $\forall(l1:\alpha \text{ list}) (l2:\beta \text{ list}) (f:\alpha \rightarrow \beta \rightarrow \text{bool}). \text{LIST\_REL } f \ l1 \ l2 \Leftrightarrow \text{LENGTH } l1 = \text{LENGTH } l2 \wedge \text{EVERY } (\text{UNCURRY } f) \ (\text{ZIP } (l1,l2))$                                                                                                                                                                               |
| $(\forall(s:\alpha + \beta). (P:\alpha + \beta \rightarrow \text{bool}) \ s) \Leftrightarrow (\forall(x:\alpha). P \ (\text{INL } x:\alpha + \beta)) \wedge \forall(y:\beta). P \ (\text{INR } y:\alpha + \beta)$                                                                                                                                                                                                                                  |

|                                                                                                                                                                                                                                                                                                                                                                                                            |
|------------------------------------------------------------------------------------------------------------------------------------------------------------------------------------------------------------------------------------------------------------------------------------------------------------------------------------------------------------------------------------------------------------|
| $\forall (P : \alpha \# \beta \rightarrow \gamma). (\lambda (p : \alpha \# \beta). P p) = (\lambda ((p_1 : \alpha), (p_2 : \beta)). P (p_1, p_2))$                                                                                                                                                                                                                                                         |
| $\forall (n : \text{num}). \text{count } (n + (1 : \text{num})) = n \text{ INSERT count } n$                                                                                                                                                                                                                                                                                                               |
| $\forall (P : \alpha \rightarrow \text{bool}) (l : \alpha \text{ list}). \text{FILTER } P l = \text{FOLDER } (\lambda (x : \alpha) (l' : \alpha \text{ list}). \text{if } P x \text{ then } x :: l' \text{ else } l') ([ ] : \alpha \text{ list}) l$                                                                                                                                                       |
| $\forall (l : (\alpha \# \beta) \text{ list}). \text{LENGTH } (\text{UNZIP\_FST } l) = \text{LENGTH } l$                                                                                                                                                                                                                                                                                                   |
| $\forall (R : \alpha \rightarrow \alpha \rightarrow \text{bool}). \text{WeakOrder } R \Rightarrow \forall (y : \alpha) (z : \alpha). y = z \Leftrightarrow R y z \wedge R z y$                                                                                                                                                                                                                             |
| $\forall (\text{opt} : \alpha \text{ option}). \text{OPTION\_BIND } \text{opt } (\text{SOME } : \alpha \rightarrow \alpha \text{ option}) = \text{opt}$                                                                                                                                                                                                                                                    |
| $((p : \text{bool}) \Leftrightarrow (q : \text{bool}) \wedge (r : \text{bool})) \Leftrightarrow (p \vee \neg q \vee \neg r) \wedge (q \vee \neg p) \wedge (r \vee \neg p)$                                                                                                                                                                                                                                 |
| $\text{LIST\_REL } (\lambda (a : \alpha) (b : \beta). (P : \alpha \rightarrow \beta \rightarrow \text{bool}) a b \wedge (Q : \alpha \rightarrow \beta \rightarrow \text{bool}) a b) (l_1 : \alpha \text{ list}) (l_2 : \beta \text{ list}) \Leftrightarrow \text{LIST\_REL } (\lambda (a : \alpha) (b : \beta). P a b) l_1 l_2 \wedge \text{LIST\_REL } (\lambda (a : \alpha) (b : \beta). Q a b) l_1 l_2$ |
| $\forall (n : \text{num}) (m : \text{num}) (l : \alpha \text{ list}). \text{TAKE } (n + m) l = \text{TAKE } n l ++ \text{TAKE } m (\text{DROP } n l)$                                                                                                                                                                                                                                                      |
| $\text{MAX } (0 : \text{num}) (x : \text{num}) = x \wedge \text{MAX } x (0 : \text{num}) = x \wedge \text{MAX } (\text{NUMERAL } x) (\text{NUMERAL } (y : \text{num})) = \text{NUMERAL } (\text{if } x < y \text{ then } y \text{ else } x)$                                                                                                                                                               |
| $\forall (R : \alpha \rightarrow \alpha \rightarrow \text{bool}). \text{transitive } R \Rightarrow R^+ = R$                                                                                                                                                                                                                                                                                                |
| $(\text{OPTION\_GUARD } (b : \text{bool}) = \text{SOME } () \Leftrightarrow b) \wedge (\text{OPTION\_GUARD } b = (\text{NONE} : \text{unit option}) \Leftrightarrow \neg b)$                                                                                                                                                                                                                               |
| $\forall (f : \alpha \rightarrow \beta) (s : \beta \rightarrow \text{bool}). \text{PREIMAGE } f s = s \circ f$                                                                                                                                                                                                                                                                                             |
| $\forall (l_1 : \alpha \text{ list}) (l_2 : \alpha \text{ list}) (P : \alpha \rightarrow \text{bool}) (P' : \alpha \rightarrow \text{bool}). l_1 = l_2 \wedge (\forall (x : \alpha). \text{MEM } x l_2 \Rightarrow (P x \Leftrightarrow P' x)) \Rightarrow (\text{EXISTS } P l_1 \Leftrightarrow \text{EXISTS } P' l_2)$                                                                                   |
| $\text{flip } (\text{UNCURRY } (f : \alpha \rightarrow \beta \rightarrow \delta \rightarrow \gamma)) (x : \delta) = \text{UNCURRY } (\text{flip } ((\text{flip } : (\beta \rightarrow \delta \rightarrow \gamma) \rightarrow \delta \rightarrow \beta \rightarrow \gamma) \circ f) x)$                                                                                                                     |
| $\forall (P_1 : \alpha \rightarrow \text{bool}) (P_2 : \alpha \rightarrow \text{bool}) (l : \alpha \text{ list}). \text{EVERY } P_1 l \Rightarrow \text{EVERY } P_1 (\text{FILTER } P_2 l)$                                                                                                                                                                                                                |
| $\forall (p : \alpha \rightarrow \beta) (g : \alpha \rightarrow \text{bool}) (r : \alpha \rightarrow \gamma) (v : \beta) (\text{rows} : (\beta \rightarrow \gamma \text{ option}) \text{ list}). (\forall (x : \alpha). r x = (\text{ARB} : \gamma)) \Rightarrow \text{PMATCH } v (\text{SNOC } (\text{PMATCH\_ROW } p g r) \text{rows}) = \text{PMATCH } v \text{rows}$                                   |
| $\forall (x : \alpha) (l : \alpha \text{ list}). \text{MEM } x l \Leftrightarrow \text{EXISTS } (\$ = x) l$                                                                                                                                                                                                                                                                                                |
| $\neg(\neg(A : \text{bool}) \vee (B : \text{bool})) \Rightarrow F \Leftrightarrow A \Rightarrow \neg B \Rightarrow F$                                                                                                                                                                                                                                                                                      |
| $\forall (R : \alpha \rightarrow \alpha \rightarrow \text{bool}). \text{SC } (\text{RC } R) = \text{RC } (\text{SC } R) \wedge \text{RC } (\text{RC } R) = \text{RC } R \wedge (\text{RC } R)^+ = \text{RC } R^+$                                                                                                                                                                                          |
| $\forall (s : \alpha \rightarrow \text{bool}). (\emptyset : \alpha \rightarrow \text{bool}) \subseteq s$                                                                                                                                                                                                                                                                                                   |
| $\forall (l : \alpha \text{ list}). \text{NULL } l \Leftrightarrow \text{LENGTH } l = (0 : \text{num})$                                                                                                                                                                                                                                                                                                    |
| $\forall (P : \alpha \# \beta \rightarrow \text{bool}). (\forall (p_1 : \alpha) (p_2 : \beta). P (p_1, p_2)) \Rightarrow \forall (p : \alpha \# \beta). P p$                                                                                                                                                                                                                                               |
| $\text{WF } (R : \alpha \rightarrow \alpha \rightarrow \text{bool}) \Rightarrow R^+ (x : \alpha) (y : \alpha) \Rightarrow x \neq y$                                                                                                                                                                                                                                                                        |
| $\forall (f : \alpha \rightarrow \beta \rightarrow \alpha) (e : \alpha) (g : \gamma \rightarrow \beta) (l : \gamma \text{ list}). \text{FOLDL } f e (\text{MAP } g l) = \text{FOLDL } (\lambda (x : \alpha) (y : \gamma). f x (g y)) e l$                                                                                                                                                                  |
| $\forall (f : \alpha \rightarrow \beta) (s : \alpha \rightarrow \text{bool}) (t : \beta \rightarrow \text{bool}). \text{INJ } f s t \Rightarrow \text{IMAGE } f s \subseteq t$                                                                                                                                                                                                                             |
| $\forall (\text{opt} : \alpha \text{ option}). \text{opt} = (\text{NONE} : \alpha \text{ option}) \vee \exists (x : \alpha). \text{opt} = \text{SOME } x$                                                                                                                                                                                                                                                  |
| $(\forall (s : \alpha \rightarrow \text{bool}). (\emptyset : \alpha \rightarrow \text{bool}) \cap s = (\emptyset : \alpha \rightarrow \text{bool})) \wedge \forall (s : \alpha \rightarrow \text{bool}). s \cap (\emptyset : \alpha \rightarrow \text{bool}) = (\emptyset : \alpha \rightarrow \text{bool})$                                                                                               |
| $\text{OPTION\_MAP } (l : \alpha \rightarrow \alpha) (x : \alpha \text{ option}) = x \wedge \text{OPTION\_MAP } (\lambda (x : \alpha). x) x = x$                                                                                                                                                                                                                                                           |
| $(\text{pair\_CASE } (p : \beta \# \gamma) (f : \beta \rightarrow \gamma \rightarrow \alpha) : \alpha) = (v : \alpha) \Leftrightarrow \exists (x : \beta) (y : \gamma). p = (x, y) \wedge f x y = v$                                                                                                                                                                                                       |
| $\text{WF } (R : \alpha \rightarrow \alpha \rightarrow \text{bool}) \Rightarrow \text{irreflexive } R$                                                                                                                                                                                                                                                                                                     |
| $\forall (s : \alpha \rightarrow \text{bool}) (t : \alpha \rightarrow \text{bool}). \text{FINITE } s \wedge t \subseteq s \Rightarrow \text{FINITE } t$                                                                                                                                                                                                                                                    |
| $\forall (f : \alpha \rightarrow \beta) (R : \alpha \rightarrow \alpha \rightarrow \text{bool}) (P : \alpha \rightarrow \beta \rightarrow \text{bool}) (M : (\alpha \rightarrow \beta) \rightarrow \alpha \rightarrow \beta) (x : \alpha). f = \text{WFREC } R M \wedge \text{WF } R \wedge \text{INDUCTIVE\_INVARIANT } R P M \Rightarrow P x (f x)$                                                      |
| $\forall (R : \alpha \rightarrow \alpha \rightarrow \text{bool}). \text{symmetric } (\text{RC } R) \Leftrightarrow \text{symmetric } R$                                                                                                                                                                                                                                                                    |

|                                                                                                                                                                                                                                                                                                                                                                                      |
|--------------------------------------------------------------------------------------------------------------------------------------------------------------------------------------------------------------------------------------------------------------------------------------------------------------------------------------------------------------------------------------|
| $\forall (n : \text{num}) (x : \alpha) (y : \alpha). \text{MEM } y (\text{REPLICATE } n \ x) \Leftrightarrow x = y \wedge (0 : \text{num}) < n$                                                                                                                                                                                                                                      |
| $\forall (P : \alpha \rightarrow \text{bool}) (ls : \alpha \text{ list}). \text{NULL } (\text{FILTER } P \ ls) \Leftrightarrow \forall (x : \alpha). \text{MEM } x \ ls \Rightarrow \neg P \ x$                                                                                                                                                                                      |
| $\text{SING } (\emptyset : \alpha \rightarrow \text{bool}) \Leftrightarrow F$                                                                                                                                                                                                                                                                                                        |
| $\neg((p : \text{bool}) \vee (q : \text{bool})) \Rightarrow \neg q$                                                                                                                                                                                                                                                                                                                  |
| $(([(f : \beta \rightarrow \alpha)] <^* > [(x : \beta)]) : \alpha \text{ list}) = [f \ x]$                                                                                                                                                                                                                                                                                           |
| $\forall (f : \alpha \rightarrow \beta) (s : \beta \rightarrow \text{bool}) (x : \alpha). x \in \text{PREIMAGE } f \ s \Leftrightarrow f \ x \in s$                                                                                                                                                                                                                                  |
| $\forall (f : \alpha \rightarrow \beta \rightarrow \alpha) (e : \alpha) (x : \beta). \text{FOLDL } f \ e \ [x] = f \ e \ x$                                                                                                                                                                                                                                                          |
| $\forall (P : \alpha \rightarrow \text{bool}) (Q : \beta \rightarrow \text{bool}) (x : \alpha). (x \text{ INSERT } P) \times Q = \{x\} \times Q \cup P \times Q$                                                                                                                                                                                                                     |
| $(n : \text{num}) = \text{LENGTH } (l1 : \alpha \text{ list}) \Rightarrow \text{ZIP } (l1, \text{COUNT\_LIST } n) = \text{GENLIST } (\lambda (n : \text{num}). (\text{EL } n \ l1, n)) (\text{LENGTH } l1)$                                                                                                                                                                          |
| $(\forall (x : \alpha). \text{MEM } x \ (ls : \alpha \text{ list}) \Rightarrow (R : \alpha \rightarrow \alpha \rightarrow \text{bool}) \ x \ x) \Rightarrow \text{LIST\_REL } R \ ls \ ls$                                                                                                                                                                                           |
| $\text{LAST } ((h : \alpha) :: (t : \alpha \text{ list})) = \text{if } t = ([]) : \alpha \text{ list} \text{ then } h \text{ else } \text{LAST } t$                                                                                                                                                                                                                                  |
| $\forall (s : \alpha \rightarrow \text{bool}). s \subseteq (\emptyset : \alpha \rightarrow \text{bool}) \Leftrightarrow s = (\emptyset : \alpha \rightarrow \text{bool})$                                                                                                                                                                                                            |
| $\text{SET\_TO\_LIST } \{(x : \alpha)\} = [x]$                                                                                                                                                                                                                                                                                                                                       |
| $\forall (s : \alpha \rightarrow \text{bool}) (t : \alpha \rightarrow \text{bool}) (x : \alpha). (s \text{ DIFF } t) \ x \Leftrightarrow x \in s \wedge x \notin t$                                                                                                                                                                                                                  |
| $\forall (n : \text{num}) (k : \text{num}). \text{SUM } (\text{REPLICATE } n \ k) = n * k$                                                                                                                                                                                                                                                                                           |
| $\forall (P : \alpha \rightarrow \text{bool}). \text{INFINITE } P \Rightarrow \exists (x : \alpha). x \in P$                                                                                                                                                                                                                                                                         |
| $(n : \text{num}) \leq \text{tri } n$                                                                                                                                                                                                                                                                                                                                                |
| $(\forall (x : \alpha) (y : \alpha). (R : \alpha \rightarrow \alpha \rightarrow \text{bool}) \ x \ y \Rightarrow R ((f : \alpha \rightarrow \alpha) \ x) (f \ y)) \Rightarrow \forall (x : \alpha) (y : \alpha). R^\star \ x \ y \Rightarrow R^\star (f \ x) (f \ y)$                                                                                                                |
| $\forall (l : \alpha \text{ list}) (f : \alpha \rightarrow \beta). \text{LENGTH } (\text{MAP } f \ l) = \text{LENGTH } l$                                                                                                                                                                                                                                                            |
| $\text{INJ } (f : \alpha \rightarrow \beta) (s : \alpha \rightarrow \text{bool}) (t : \beta \rightarrow \text{bool}) \Rightarrow \forall (x : \alpha) (y : \beta). \text{LINV\_OPT } f \ s \ y = \text{SOME } x \Leftrightarrow y = f \ x \wedge x \in s \wedge y \in t$                                                                                                             |
| $\text{MAP } (\lambda ((x : \alpha), (y : \beta), (z : \gamma)). x) (\text{funs} : (\alpha \# \beta \# \gamma) \text{ list}) = \text{MAP } (\text{FST} : \alpha \# \beta \# \gamma \rightarrow \alpha) \text{ funs}$                                                                                                                                                                 |
| $\forall (l : (\alpha \# \beta) \text{ list}). \text{LENGTH } (\text{UNZIP\_SND } l) = \text{LENGTH } l$                                                                                                                                                                                                                                                                             |
| $\text{Order } (R : \alpha \rightarrow \alpha \rightarrow \text{bool}) \Leftrightarrow \text{WeakOrder } (R \text{ C } R)$                                                                                                                                                                                                                                                           |
| $\forall (l : \alpha \text{ list}) (l' : \alpha \text{ list}) (b : \beta) (b' : \beta) (f : \alpha \rightarrow \beta \rightarrow \beta) (f' : \alpha \rightarrow \beta \rightarrow \beta). l = l' \wedge b = b' \wedge (\forall (x : \alpha) (a : \beta). \text{MEM } x \ l' \Rightarrow f \ x \ a = f' \ x \ a) \Rightarrow \text{FOLDER } f \ b \ l = \text{FOLDER } f' \ b' \ l'$ |
| $\forall (f : \alpha \rightarrow \alpha) (s : \alpha \rightarrow \text{bool}). (x : \alpha) \in \text{schroeder\_close } f \ s \Leftrightarrow \exists (n : \text{num}). x \in \text{FUNPOW } (\text{IMAGE } f) \ n \ s$                                                                                                                                                             |
| $\forall (R : \alpha \rightarrow \alpha \rightarrow \text{bool}) (s : \alpha \rightarrow \text{bool}) (t : \alpha \rightarrow \text{bool}). t \in \text{partition } R \ s \Rightarrow t \subseteq s$                                                                                                                                                                                 |
| $\forall (M : (\alpha \rightarrow \beta) \rightarrow \alpha \rightarrow \beta) (R : \alpha \rightarrow \alpha \rightarrow \text{bool}) (f : \alpha \rightarrow \beta). f = \text{WFREC } R \ M \Rightarrow \text{WF } R \Rightarrow \forall (x : \alpha). f \ x = M (\text{RESTRICT } f \ R \ x) \ x$                                                                                |
| $\forall (n : \text{num}). \neg(n < (0 : \text{num}))$                                                                                                                                                                                                                                                                                                                               |
| $\forall (S : \alpha \rightarrow \text{bool}). \text{FINITE } S \Rightarrow \forall (t : \beta \rightarrow \text{bool}) (f : \alpha \rightarrow \beta). \text{BIJ } f \ S \ t \wedge \text{FINITE } t \Rightarrow \text{CARD } S = \text{CARD } t$                                                                                                                                   |
| $((x : \alpha), (y : \beta)) \in \{(x, y) \mid (P : \alpha \rightarrow \beta \rightarrow \text{bool}) \ x \ y\} \Leftrightarrow P \ x \ y$                                                                                                                                                                                                                                           |
| $\forall (ls : \alpha \text{ list}) (f : \beta \rightarrow \alpha \# \alpha \rightarrow \beta) (e : \beta). \text{FOLDL } f \ e \ (\text{ZIP } (ls, ls)) = \text{FOLDL } (\lambda (x : \beta) (y : \alpha). f \ x \ (y, y)) \ e \ ls$                                                                                                                                                |
| $\forall (t : \text{bool}). \neg\neg t \Leftrightarrow t$                                                                                                                                                                                                                                                                                                                            |
| $\forall (s : \alpha \rightarrow \text{bool}) (t : \alpha \rightarrow \text{bool}) (x : \alpha). (x \text{ INSERT } s) \text{ DIFF } t = \text{if } x \in t \text{ then } s \text{ DIFF } t \text{ else } x \text{ INSERT } s \text{ DIFF } t$                                                                                                                                       |
| $\forall (\text{set} : \alpha \rightarrow \text{bool}) (e : \alpha \rightarrow \text{bool}). \text{POW } \text{set } e \Leftrightarrow e \subseteq \text{set}$                                                                                                                                                                                                                       |
| $(\forall (x : \alpha) (y : \alpha). (R : \alpha \rightarrow \alpha \rightarrow \text{bool}) \ x \ y \Rightarrow (R' : \alpha \rightarrow \alpha \rightarrow \text{bool}) \ x \ y) \Rightarrow R^\wedge = (x : \alpha) (y : \alpha) \Rightarrow R'^\wedge = x \ y$                                                                                                                   |



|                                                                                                                                                                                                                                                                                                                                                                                                                                                                              |
|------------------------------------------------------------------------------------------------------------------------------------------------------------------------------------------------------------------------------------------------------------------------------------------------------------------------------------------------------------------------------------------------------------------------------------------------------------------------------|
| $\text{nfst } (0 : \text{num}) = (0 : \text{num})$                                                                                                                                                                                                                                                                                                                                                                                                                           |
| $\forall (s : \alpha \rightarrow \text{bool}). s \cup s = s$                                                                                                                                                                                                                                                                                                                                                                                                                 |
| $(\forall (l : \alpha \text{ list}). \text{TAKE } (0 : \text{num}) l = ([] : \alpha \text{ list})) \wedge \forall (n : \text{num}) (x : \alpha) (l : \alpha \text{ list}). \text{TAKE } (\text{SUC } n) (x :: l) = x :: \text{TAKE } n l$                                                                                                                                                                                                                                    |
| $\forall (l : \alpha \text{ list}). \text{NULL } l \Leftrightarrow l = ([] : \alpha \text{ list})$                                                                                                                                                                                                                                                                                                                                                                           |
| $\forall (x : \alpha \rightarrow \text{bool}) (y : \beta \rightarrow \text{bool}). \text{FUNSET } x y = \text{DFUNSET } x (K y : \alpha \rightarrow \beta \rightarrow \text{bool})$                                                                                                                                                                                                                                                                                          |
| $\forall (A : \text{bool}). \neg A \wedge A \Leftrightarrow F$                                                                                                                                                                                                                                                                                                                                                                                                               |
| $\forall (x : \alpha) (y : \beta). (\text{INL } x : \alpha + \beta) \neq (\text{INR } y : \alpha + \beta)$                                                                                                                                                                                                                                                                                                                                                                   |
| $\forall (ls : \alpha \text{ list}) (n : \text{num}). \text{DROP } n ls = ([] : \alpha \text{ list}) \Leftrightarrow \text{LENGTH } ls \leq n$                                                                                                                                                                                                                                                                                                                               |
| $\text{DIV2 } (\text{BIT1 } (x : \text{num})) = x$                                                                                                                                                                                                                                                                                                                                                                                                                           |
| $\forall (R : \alpha \rightarrow \alpha \rightarrow \text{bool}) (P : \alpha \rightarrow \alpha \rightarrow \text{bool}). (\forall (x : \alpha). P x x) \wedge (\forall (x : \alpha) (y : \alpha) (z : \alpha). R x y \wedge P y z \Rightarrow P x z) \Rightarrow \forall (x : \alpha) (y : \alpha). R^* x y \Rightarrow P x y$                                                                                                                                              |
| $\forall (s : \alpha \rightarrow \text{bool}) (x : \alpha). x \text{ INSERT } s = \{x\} \cup s$                                                                                                                                                                                                                                                                                                                                                                              |
| $\text{BIJ } (f : \alpha \rightarrow \beta) \mathbb{U}(:\alpha) \mathbb{U}(:\beta) \Rightarrow \forall (x : \alpha) (y : \alpha). f x = f y \Leftrightarrow x = y$                                                                                                                                                                                                                                                                                                           |
| $\forall (l : \alpha \text{ list}) (f : \alpha \rightarrow \beta). \text{MAP } f (\text{TL } l) = \text{TL } (\text{MAP } f l)$                                                                                                                                                                                                                                                                                                                                              |
| $\forall (s : \alpha \rightarrow \text{bool}) (f : \alpha \rightarrow \beta \rightarrow \beta) (b : \beta). \text{FINITE } s \Rightarrow \text{ITSET } f s b = \text{if } s = (\emptyset : \alpha \rightarrow \text{bool}) \text{ then } b \text{ else } \text{ITSET } f (\text{REST } s) (f (\text{CHOICE } s) b)$                                                                                                                                                          |
| $\forall (x : \alpha) (l : \alpha \text{ list}). \text{ALL\_DISTINCT } (\text{SNOC } x l) \Leftrightarrow \neg \text{MEM } x l \wedge \text{ALL\_DISTINCT } l$                                                                                                                                                                                                                                                                                                               |
| $\forall (p : \text{bool}) (q : \text{bool}) (m : \text{bool}). (\text{stmarker } m \vee p \Leftrightarrow p \vee \text{stmarker } m) \wedge (p \vee q \vee \text{stmarker } m \Leftrightarrow (p \vee q) \vee \text{stmarker } m) \wedge ((p \vee \text{stmarker } m) \vee q \Leftrightarrow (p \vee q) \vee \text{stmarker } m)$                                                                                                                                           |
| $\forall (x : \alpha). \{x\} \neq (\emptyset : \alpha \rightarrow \text{bool})$                                                                                                                                                                                                                                                                                                                                                                                              |
| $S (f : \alpha \# \beta \rightarrow \delta \rightarrow \gamma) (\text{UNCURRY } (g : \alpha \rightarrow \beta \rightarrow \delta)) = \text{UNCURRY } (S ((S : (\beta \rightarrow \delta \rightarrow \gamma) \rightarrow (\beta \rightarrow \delta) \rightarrow \beta \rightarrow \gamma) \circ (\$o f : (\beta \rightarrow \alpha \# \beta) \rightarrow \beta \rightarrow \delta \rightarrow \gamma) \circ (\$, : \alpha \rightarrow \beta \rightarrow \alpha \# \beta)) g)$ |
| $\forall (s : \alpha \rightarrow \text{bool}). s \text{ DIFF } (\emptyset : \alpha \rightarrow \text{bool}) = s$                                                                                                                                                                                                                                                                                                                                                             |
| $\forall (x : \alpha) (s : \alpha \rightarrow \text{bool}). x \in s \Leftrightarrow x \text{ INSERT } s = s$                                                                                                                                                                                                                                                                                                                                                                 |
| $\forall (f : \alpha \rightarrow \beta) (P : \alpha \rightarrow \text{bool}) (Q : \alpha \rightarrow \beta \rightarrow \text{bool}). \text{DFUNSET } P Q f \Leftrightarrow \forall (x : \alpha). x \in P \Rightarrow f x \in Q x$                                                                                                                                                                                                                                            |
| $\forall (R : \alpha \rightarrow \alpha \rightarrow \text{bool}) (P : \alpha \rightarrow \alpha \rightarrow \text{bool}). (\forall (x : \alpha). P x x) \wedge (\forall (x : \alpha) (y : \alpha) (z : \alpha). R x y \wedge R^* y z \wedge P y z \Rightarrow P x z) \Rightarrow \forall (x : \alpha) (y : \alpha). R^* x y \Rightarrow P x y$                                                                                                                               |
| $\forall (f : \alpha \rightarrow \beta). (\forall (s : \beta \rightarrow \text{bool}). \text{SURJ } f (\emptyset : \alpha \rightarrow \text{bool}) s \Leftrightarrow s = (\emptyset : \beta \rightarrow \text{bool})) \wedge \forall (s : \alpha \rightarrow \text{bool}). \text{SURJ } f s (\emptyset : \beta \rightarrow \text{bool}) \Leftrightarrow s = (\emptyset : \alpha \rightarrow \text{bool})$                                                                    |
| $\forall (P : \alpha \rightarrow \text{bool}) (f : \beta \rightarrow \alpha) (l : \beta \text{ list}). \text{EVERY } P (\text{MAP } f l) \Leftrightarrow \text{EVERY } (P \circ f) l$                                                                                                                                                                                                                                                                                        |
| $\forall (n1 : \text{num}) (n2 : \text{num}). (\text{ind\_type\$INJN } n1 : \text{num} \rightarrow \alpha \rightarrow \text{bool}) = (\text{ind\_type\$INJN } n2 : \text{num} \rightarrow \alpha \rightarrow \text{bool}) \Leftrightarrow n1 = n2$                                                                                                                                                                                                                           |
| $\forall (x : \alpha \text{ list}) (y : \alpha \text{ list}) (z : \alpha \text{ list}). y \leq x \wedge z \leq y \Rightarrow z \leq x$                                                                                                                                                                                                                                                                                                                                       |
| $\forall (P : \alpha \rightarrow \text{bool}) (x : \alpha) (l : \alpha \text{ list}). \text{EVERY } P (\text{SNOC } x l) \Leftrightarrow \text{EVERY } P l \wedge P x$                                                                                                                                                                                                                                                                                                       |
| $(\forall (x : \alpha) (y : \alpha). (R : \alpha \rightarrow \alpha \rightarrow \text{bool}) x y \Rightarrow (f : \alpha \rightarrow \beta) x = f y) \Rightarrow \forall (x : \alpha) (y : \alpha). \text{SC } R x y \Rightarrow f x = f y$                                                                                                                                                                                                                                  |
| $\forall (R : \alpha \rightarrow \alpha \rightarrow \text{bool}) (f : \beta \rightarrow \alpha). \text{transitive } R \Rightarrow \text{transitive } (\text{inv\_image } R f)$                                                                                                                                                                                                                                                                                               |
| $\forall (n : \text{num}) (l : \alpha \text{ list}). n < \text{LENGTH } l \Rightarrow \text{SEG } (1 : \text{num}) n l = [\text{EL } n l]$                                                                                                                                                                                                                                                                                                                                   |
| $(\forall (a : \alpha \text{ list}) (c : \alpha \text{ list}). (d : \alpha \text{ list}) \neq a ++ [(b : \alpha)] ++ c) \Leftrightarrow \neg \text{MEM } b d$                                                                                                                                                                                                                                                                                                                |
| $\forall (a : \alpha \text{ list}) (b : \alpha \text{ list}) (c : \alpha \text{ list}). a ++ b \leq a ++ c \Leftrightarrow b \leq c$                                                                                                                                                                                                                                                                                                                                         |
| $\text{countable } \mathbb{U}(:\alpha \# \beta) \Leftrightarrow \text{countable } \mathbb{U}(:\alpha) \wedge \text{countable } \mathbb{U}(:\beta)$                                                                                                                                                                                                                                                                                                                           |
| $\forall (l1 : \alpha \text{ list}) (l2 : \alpha \text{ list}) (e : \alpha). \text{FRONT } (l1 ++ e :: l2) = l1 ++ \text{FRONT } (e :: l2)$                                                                                                                                                                                                                                                                                                                                  |

|                                                                                                                                                                                                                                                                                                                                                                                                            |
|------------------------------------------------------------------------------------------------------------------------------------------------------------------------------------------------------------------------------------------------------------------------------------------------------------------------------------------------------------------------------------------------------------|
| $\forall (v : \alpha) (\text{rows\_old} : (\alpha \rightarrow \beta \text{ option}) \text{ list}) (\text{rows\_new} : (\alpha \rightarrow \beta \text{ option}) \text{ list}) (r : \alpha \rightarrow \beta \text{ option}).$<br>$\text{PMATCH } v \text{ rows\_old} = \text{PMATCH } v \text{ rows\_new} \Rightarrow \text{PMATCH } v (r :: \text{rows\_old}) = \text{PMATCH } v (r :: \text{rows\_new})$ |
| $\forall (R : \alpha \rightarrow \alpha \rightarrow \text{bool}) (Q : \alpha \rightarrow \text{bool}) (a : \alpha). Q a \wedge (\forall (y : \alpha) (z : \alpha). Q y \wedge R y z \Rightarrow Q z) \Rightarrow \forall (z : \alpha). R^* a z \Rightarrow Q z$                                                                                                                                            |
| $\forall (n : \text{num}) (l : \alpha \text{ list}). \text{LENGTH } (\text{DROP } n \text{ l}) = \text{LENGTH } l - n$                                                                                                                                                                                                                                                                                     |
| $(\forall (l1 : \alpha \text{ list}) (l2 : \alpha \text{ list}). ([ ] : \alpha \text{ list}) = l1 ++ l2 \Leftrightarrow l1 = ([ ] : \alpha \text{ list}) \wedge l2 = ([ ] : \alpha \text{ list})) \wedge \forall (l1 : \alpha \text{ list}) (l2 : \alpha \text{ list}). l1 ++ l2 = ([ ] : \alpha \text{ list}) \Leftrightarrow l1 = ([ ] : \alpha \text{ list}) \wedge l2 = ([ ] : \alpha \text{ list})$   |
| $\forall (P : \alpha \text{ option} \rightarrow \text{bool}). P (\text{NONE} : \alpha \text{ option}) \wedge (\forall (a : \alpha). P (\text{SOME } a)) \Rightarrow \forall (x : \alpha \text{ option}). P x$                                                                                                                                                                                              |
| $\forall (R : \alpha \rightarrow \alpha \rightarrow \text{bool}). \text{WF } R \Rightarrow \forall (P : \alpha \rightarrow \text{bool}). (\forall (x : \alpha). (\forall (y : \alpha). R y x \Rightarrow P y) \Rightarrow P x) \Rightarrow \forall (x : \alpha). P x$                                                                                                                                      |
| $\forall (s : \alpha \rightarrow \text{bool}). \text{INFINITE } s \Rightarrow \text{INFINITE } (\text{REST } s)$                                                                                                                                                                                                                                                                                           |
| $\text{transitive } (R1 : \alpha \rightarrow \alpha \rightarrow \text{bool}) \wedge \text{transitive } (R2 : \alpha \rightarrow \alpha \rightarrow \text{bool}) \Rightarrow \text{transitive } (R1 \cap_r R2)$                                                                                                                                                                                             |
| $\forall (l : \alpha \text{ list}) (m : \text{num}) (x : \alpha). \text{MEM } x (\text{TAKE } m \text{ l}) \Rightarrow \text{MEM } x \text{ l}$                                                                                                                                                                                                                                                            |
| $\forall (x : \alpha) (s : \alpha \rightarrow \text{bool}). x \notin s \Rightarrow \forall (t : \alpha \rightarrow \text{bool}). s \subseteq x \text{ INSERT } t \Leftrightarrow s \subseteq t$                                                                                                                                                                                                            |
| $\forall (m : \text{num}) (n : \text{num}). m \leq n \Rightarrow \text{count } m \subseteq \text{count } n$                                                                                                                                                                                                                                                                                                |
| $\forall (R : \alpha \rightarrow \alpha \rightarrow \text{bool}) (f : \beta \rightarrow \alpha). \text{reflexive } R \Rightarrow \text{reflexive } (\text{inv\_image } R f)$                                                                                                                                                                                                                               |
| $\forall (R : \alpha \rightarrow \alpha \rightarrow \text{bool}) (P : \alpha \rightarrow \alpha \rightarrow \text{bool}). (\forall (x : \alpha) (y : \alpha). R x y \Rightarrow P x y) \wedge (\forall (x : \alpha) (y : \alpha) (z : \alpha). P x y \wedge P y z \Rightarrow P x z) \Rightarrow \forall (u : \alpha) (v : \alpha). R^+ u v \Rightarrow P u v$                                             |
| $\text{LIST\_BIND } [(x : \beta)] (f : \beta \rightarrow \alpha \text{ list}) = f x$                                                                                                                                                                                                                                                                                                                       |
| $(\forall (x : \alpha) (y : \alpha). (R : \alpha \rightarrow \alpha \rightarrow \text{bool}) x y \Rightarrow (Q : \alpha \rightarrow \alpha \rightarrow \text{bool}) x y) \Rightarrow R^+ (x : \alpha) (y : \alpha) \Rightarrow Q^+ x y$                                                                                                                                                                   |
| $\forall (X : \alpha \rightarrow \text{bool}) (P : (\alpha \rightarrow \text{bool}) \rightarrow \text{bool}). X \subseteq \text{BIGINTER } P \Leftrightarrow \forall (Y : \alpha \rightarrow \text{bool}). Y \in P \Rightarrow X \subseteq Y$                                                                                                                                                              |
| $\forall (P : \alpha \rightarrow \text{bool}) (Q : \beta \rightarrow \text{bool}) (x : \alpha \# \beta). x \in P \times Q \Leftrightarrow \text{FST } x \in P \wedge \text{SND } x \in Q$                                                                                                                                                                                                                  |
| $\forall (f : \alpha \rightarrow \beta) (x : \alpha) (s : \alpha \rightarrow \text{bool}) (t : \beta \rightarrow \text{bool}). \text{INJ } f (x \text{ INSERT } s) t \Leftrightarrow \text{INJ } f s t \wedge f x \in t \wedge \forall (y : \alpha). y \in s \wedge f y = f x \Rightarrow x = y$                                                                                                           |
| $\text{FINITE } (s : \alpha \rightarrow \text{bool}) \wedge \text{FINITE } (t : \alpha \rightarrow \text{bool}) \Rightarrow \text{CARD } (s \cup t) \leq \text{CARD } s + \text{CARD } t$                                                                                                                                                                                                                  |
| $\forall (l : \alpha \text{ list}) (f : \alpha \rightarrow \beta). l \neq ([ ] : \alpha \text{ list}) \Rightarrow \text{LAST } (\text{MAP } f \text{ l}) = f (\text{LAST } l)$                                                                                                                                                                                                                             |
| $\forall (m : \text{num}). m < \text{SUC } m \wedge m < \text{SUC } (\text{SUC } m)$                                                                                                                                                                                                                                                                                                                       |
| $\forall (s : \alpha \rightarrow \text{bool}). \neg (s \subset s)$                                                                                                                                                                                                                                                                                                                                         |
| $\forall (l1 : \alpha \text{ list}) (n : \text{num}). \text{LENGTH } l1 \leq n \Rightarrow \forall (l2 : \alpha \text{ list}). \text{EL } n (l1 ++ l2) = \text{EL } (n - \text{LENGTH } l1) l2$                                                                                                                                                                                                            |
| $\text{LINV\_OPT } (f : \alpha \rightarrow \beta) (s : \alpha \rightarrow \text{bool}) (y : \beta) = \text{SOME } (x : \alpha) \Rightarrow x \in s \wedge f x = y$                                                                                                                                                                                                                                         |
| $\forall (P : \alpha \rightarrow \text{bool}) (l : \alpha \text{ list}). \text{EVERY } P (\text{REVERSE } l) \Leftrightarrow \text{EVERY } P l$                                                                                                                                                                                                                                                            |
| $\forall (x : \alpha) (s : \alpha \rightarrow \text{bool}) (t : \alpha \rightarrow \text{bool}). \text{DISJOINT } (x \text{ INSERT } s) t \Leftrightarrow \text{DISJOINT } s t \wedge x \notin t$                                                                                                                                                                                                          |
| $\forall (l : \text{num list}). \text{SUM } (\text{REVERSE } l) = \text{SUM } l$                                                                                                                                                                                                                                                                                                                           |
| $\mathbb{U}(\alpha \# \beta) = \mathbb{U}(\alpha) \times \mathbb{U}(\beta)$                                                                                                                                                                                                                                                                                                                                |
| $\forall (ll : \alpha \text{ list}). ll = ([ ] : \alpha \text{ list}) \vee \exists (x : \alpha) (l : \alpha \text{ list}). ll = \text{SNOC } x \text{ l}$                                                                                                                                                                                                                                                  |
| $\forall (P : \alpha + \beta \rightarrow \text{bool}). (\exists (s : \alpha + \beta). P s) \Leftrightarrow (\exists (x : \alpha). P (\text{INL } x : \alpha + \beta)) \vee \exists (y : \beta). P (\text{INR } y : \alpha + \beta)$                                                                                                                                                                        |
| $\forall (R : \alpha \rightarrow \alpha \rightarrow \text{bool}). \text{reflexive } R \Rightarrow \text{reflexive } R^+$                                                                                                                                                                                                                                                                                   |
| $\forall (p : \text{bool}) (q : \text{bool}) (m : \text{bool}). (p \vee \text{stmarker } m \Leftrightarrow \text{stmarker } m \vee p) \wedge ((\text{stmarker } m \vee p) \vee q \Leftrightarrow \text{stmarker } m \vee p \vee q) \wedge (p \vee \text{stmarker } m \vee q \Leftrightarrow \text{stmarker } m \vee p \vee q)$                                                                             |
| $\forall (l1 : \alpha \text{ list}) (l2 : \alpha \text{ list}) (f : \alpha \rightarrow \beta) (f' : \alpha \rightarrow \beta). l1 = l2 \wedge (\forall (x : \alpha). \text{MEM } x \text{ l2} \Rightarrow f x = f' x) \Rightarrow \text{MAP } f \text{ l1} = \text{MAP } f' \text{ l2}$                                                                                                                    |
| $(\forall (x : \alpha) (y : \alpha). (R : \alpha \rightarrow \alpha \rightarrow \text{bool}) x y \Rightarrow (Q : \beta \rightarrow \beta \rightarrow \text{bool}) ((f : \alpha \rightarrow \beta) x) (f y)) \wedge \text{reflexive } Q \wedge \text{transitive } Q \Rightarrow \forall (x : \alpha) (y : \alpha). R^* x y \Rightarrow Q (f x) (f y)$                                                      |

|                                                                                                                                                                                                                                                                                                                                                                                                                                                                           |
|---------------------------------------------------------------------------------------------------------------------------------------------------------------------------------------------------------------------------------------------------------------------------------------------------------------------------------------------------------------------------------------------------------------------------------------------------------------------------|
| $\forall (s : \alpha \rightarrow \text{bool}) (t : \alpha \rightarrow \text{bool}) (u : \alpha \rightarrow \text{bool}). s \subseteq t \wedge t \subseteq u \Rightarrow s \subseteq u$                                                                                                                                                                                                                                                                                    |
| $\forall (p : \alpha \# \beta) (q : \alpha \# \beta). p = q \Leftrightarrow \text{FST } p = \text{FST } q \wedge \text{SND } p = \text{SND } q$                                                                                                                                                                                                                                                                                                                           |
| $\forall (n : \text{num}). \text{EL } n (l : \alpha \text{ list}) = \text{if } n = (0 : \text{num}) \text{ then HD } l \text{ else EL } (\text{PRE } n) (\text{TL } l)$                                                                                                                                                                                                                                                                                                   |
| $\forall (s : \alpha \rightarrow \text{bool}) (t : \alpha \rightarrow \text{bool}) (x : \alpha). x \in s \cup t \Leftrightarrow x \in s \vee x \in t$                                                                                                                                                                                                                                                                                                                     |
| $\forall (l1 : \text{num list}) (l2 : \text{num list}). \text{SUM } (l1 ++ l2) = \text{SUM } l1 + \text{SUM } l2$                                                                                                                                                                                                                                                                                                                                                         |
| $\forall (M : \alpha + \beta) (M' : \alpha + \beta) (f : \alpha \rightarrow \gamma) (f1 : \beta \rightarrow \gamma). M = M' \wedge (\forall (x : \alpha). M' = (\text{INL } x : \alpha + \beta) \Rightarrow f x = (f' : \alpha \rightarrow \gamma) x) \wedge (\forall (y : \beta). M' = (\text{INR } y : \alpha + \beta) \Rightarrow f1 y = (f1' : \beta \rightarrow \gamma) y) \Rightarrow (\text{sum\_CASE } M f f1 : \gamma) = (\text{sum\_CASE } M' f' f1' : \gamma)$ |
| $\text{REVERSE } (l : \alpha \text{ list}) = ([] : \alpha \text{ list}) \Leftrightarrow l = ([] : \alpha \text{ list})$                                                                                                                                                                                                                                                                                                                                                   |
| $\forall (l : \alpha \text{ list}). \text{FOLDR } (\text{CONS } : \alpha \rightarrow \alpha \text{ list} \rightarrow \alpha \text{ list}) ([] : \alpha \text{ list}) l = l$                                                                                                                                                                                                                                                                                               |
| $\forall (f : \alpha \rightarrow \beta) (x : \alpha) (s : \alpha \rightarrow \text{bool}). x \notin s \Rightarrow \text{IMAGE } f (s \text{ DELETE } x) = \text{IMAGE } f s$                                                                                                                                                                                                                                                                                              |
| $\forall (c : \text{bool}) (x : \text{bool}). (\text{if } c \text{ then } F \text{ else } x) \Leftrightarrow \neg c \wedge x$                                                                                                                                                                                                                                                                                                                                             |
| $\text{OPTION\_CHOICE } (m1 : \alpha \text{ option}) (\text{NONE } : \alpha \text{ option}) = m1$                                                                                                                                                                                                                                                                                                                                                                         |
| $(\forall (x : \alpha) (y : \alpha). (R : \alpha \rightarrow \alpha \rightarrow \text{bool}) x y \Rightarrow (f : \alpha \rightarrow \beta) x = f y) \Rightarrow \forall (x : \alpha) (y : \alpha). \text{RC } R x y \Rightarrow f x = f y$                                                                                                                                                                                                                               |
| $\forall (c : \text{bool}) (l : \alpha \text{ list}). \text{EXISTS } (\lambda (x : \alpha). c) l \Leftrightarrow l \neq ([] : \alpha \text{ list}) \wedge c$                                                                                                                                                                                                                                                                                                              |
| $\forall (x : \alpha \text{ list}) (y : \alpha \text{ list}). x \preceq y \wedge \text{LENGTH } x = \text{LENGTH } y \Leftrightarrow x = y$                                                                                                                                                                                                                                                                                                                               |
| $((\text{SOME } (f : \beta \rightarrow \alpha) <^* \text{SOME } (x : \beta)) : \alpha \text{ option}) = \text{SOME } (f x)$                                                                                                                                                                                                                                                                                                                                               |
| $\forall (l : \alpha \text{ list}). \text{LENGTH } l = (0 : \text{num}) \Leftrightarrow l = ([] : \alpha \text{ list})$                                                                                                                                                                                                                                                                                                                                                   |
| $(R : \alpha \rightarrow \alpha \rightarrow \text{bool}) \text{equiv\_on } (s : \alpha \rightarrow \text{bool}) \Rightarrow \forall (t1 : \alpha \rightarrow \text{bool}) (t2 : \alpha \rightarrow \text{bool}). t1 \in \text{partition } R s \wedge t2 \in \text{partition } R s \wedge t1 \neq t2 \Rightarrow \text{DISJOINT } t1 t2$                                                                                                                                   |
| $\forall (L : \alpha \text{ list}). \text{LENGTH } L = \text{LEN } L (0 : \text{num})$                                                                                                                                                                                                                                                                                                                                                                                    |
| $\forall (R : \alpha \rightarrow \alpha \rightarrow \text{bool}) (x : \alpha) (z : \alpha). R^+ x z \Rightarrow R x z \vee \exists (y : \alpha). R x y \wedge R^+ y z$                                                                                                                                                                                                                                                                                                    |
| $\forall (l1 : \alpha \text{ list}) (l2 : \alpha \text{ list}). \text{REVERSE } (l1 ++ l2) = \text{REVERSE } l2 ++ \text{REVERSE } l1$                                                                                                                                                                                                                                                                                                                                    |
| $\text{total } (R1 : \alpha \rightarrow \alpha \rightarrow \text{bool}) \wedge \text{total } (R2 : \beta \rightarrow \beta \rightarrow \text{bool}) \Rightarrow \text{total } (R1 \text{ LEX } R2)$                                                                                                                                                                                                                                                                       |
| $(\forall (y : \alpha) (x : \alpha). (\text{INL } x : \alpha + \beta) = (\text{INL } y : \alpha + \beta) \Leftrightarrow x = y) \wedge \forall (y : \beta) (x : \beta). (\text{INR } x : \alpha + \beta) = (\text{INR } y : \alpha + \beta) \Leftrightarrow x = y$                                                                                                                                                                                                        |
| $\forall (s : \alpha \rightarrow \text{bool}). \text{POW } s \neq (\emptyset : (\alpha \rightarrow \text{bool}) \rightarrow \text{bool})$                                                                                                                                                                                                                                                                                                                                 |
| $\forall (l : \alpha \text{ list}). l \neq ([] : \alpha \text{ list}) \Rightarrow \text{EL } (\text{PRE } (\text{LENGTH } l)) l = \text{LAST } l$                                                                                                                                                                                                                                                                                                                         |
| $\forall (x : \alpha \rightarrow \text{bool}) (y : \alpha \rightarrow \text{bool}). x \cup y \text{ DIFF } x = y \text{ DIFF } x \wedge x \cup y \text{ DIFF } y = x \text{ DIFF } y$                                                                                                                                                                                                                                                                                     |
| $\forall (P : \alpha \rightarrow \text{bool}) (Q : \beta \rightarrow \text{bool}) (x : \alpha \# \beta). (P \times Q) x \Leftrightarrow \text{FST } x \in P \wedge \text{SND } x \in Q$                                                                                                                                                                                                                                                                                   |
| $\forall (n : \text{num}). \text{SUC } n \neq n$                                                                                                                                                                                                                                                                                                                                                                                                                          |
| $\forall (x : \alpha). x \notin (\emptyset : \alpha \rightarrow \text{bool})$                                                                                                                                                                                                                                                                                                                                                                                             |
| $(\forall (m : \text{num}). m < (n : \text{num}) \Rightarrow (f1 : \text{num} \rightarrow \alpha) m = (f2 : \text{num} \rightarrow \alpha) m) \Rightarrow \text{GENLIST } f1 n = \text{GENLIST } f2 n$                                                                                                                                                                                                                                                                    |
| $\forall (f : \alpha \rightarrow \beta) (l1 : \alpha \text{ list}) (l2 : \alpha \text{ list}). \text{INJ } f (\text{set } l1 \cup \text{set } l2) \cup (\beta) \Rightarrow (\text{MAP } f l1 = \text{MAP } f l2 \Leftrightarrow l1 = l2)$                                                                                                                                                                                                                                 |
| $\forall (R : \alpha \rightarrow \alpha \rightarrow \text{bool}) (x : \alpha). (\forall (y : \alpha). R y x \Rightarrow \text{WFP } R y) \Rightarrow \text{WFP } R x$                                                                                                                                                                                                                                                                                                     |
| $\forall (l2 : \alpha \text{ list}) (l1 : \alpha \text{ list}). \text{LASTN } (\text{LENGTH } l2) (l1 ++ l2) = l2$                                                                                                                                                                                                                                                                                                                                                        |
| $\forall (l : \alpha \text{ list}). (0 : \text{num}) < \text{LENGTH } l \Rightarrow \text{LENGTH } (\text{TL } l) = \text{LENGTH } l - (1 : \text{num})$                                                                                                                                                                                                                                                                                                                  |
| $\forall (s : \alpha \rightarrow \text{bool}) (t : \beta \rightarrow \text{bool}) (f : \alpha \rightarrow \beta). \text{BIJ } f s t \Rightarrow \forall (e : \alpha). e \in s \Rightarrow \text{BIJ } f (s \text{ DELETE } e) (t \text{ DELETE } f e)$                                                                                                                                                                                                                    |
| $\forall (n : \text{num}) (x : \alpha). \text{LENGTH } (\text{REPLICATE } n x) = n$                                                                                                                                                                                                                                                                                                                                                                                       |
| $\text{IMAGE } (l : \alpha \rightarrow \alpha) (s : \alpha \rightarrow \text{bool}) = s$                                                                                                                                                                                                                                                                                                                                                                                  |

|                                                                                                                                                                                                                                                                                                                                                                                                                                                                                                          |
|----------------------------------------------------------------------------------------------------------------------------------------------------------------------------------------------------------------------------------------------------------------------------------------------------------------------------------------------------------------------------------------------------------------------------------------------------------------------------------------------------------|
| $\text{antisymmetric } (\$ \text{RSUBSET } :(\alpha \rightarrow \beta \rightarrow \text{bool}) \rightarrow (\alpha \rightarrow \beta \rightarrow \text{bool}) \rightarrow \text{bool})$                                                                                                                                                                                                                                                                                                                  |
| $\forall (l : \alpha \text{ list}). \text{LASTN } (\text{LENGTH } l) \ l = l$                                                                                                                                                                                                                                                                                                                                                                                                                            |
| $\forall (R : \alpha \rightarrow \alpha \rightarrow \text{bool}). \text{equivalence } R \Leftrightarrow \forall (x : \alpha) (y : \alpha). R \ x \ y \Leftrightarrow R \ x = R \ y$                                                                                                                                                                                                                                                                                                                      |
| $\forall (l : \alpha \text{ list}) (x : \alpha). \text{ELL } (\text{LENGTH } l) (\text{SNOC } x \ l) = \text{if NULL } l \text{ then } x \text{ else } \text{HD } l$                                                                                                                                                                                                                                                                                                                                     |
| $\forall (l : \alpha \text{ list}) (m : \text{num}) (P : \alpha \rightarrow \text{bool}). \text{EXISTS } P (\text{DROP } m \ l) \Rightarrow \text{EXISTS } P \ l$                                                                                                                                                                                                                                                                                                                                        |
| $\forall (m : \text{num}) (n : \text{num}). (\lambda (x : \text{num}) (y : \text{num}). y = \text{SUC } x)^+ m (\text{SUC } n) \Leftrightarrow (\lambda (x : \text{num}) (y : \text{num}). y = \text{SUC } x)^{\star} m \ n$                                                                                                                                                                                                                                                                             |
| $\forall (P : \gamma \rightarrow \delta) (M : \alpha \# \beta) (N : \alpha \rightarrow \beta \rightarrow \gamma). P (\text{let } ((x : \alpha), (y : \beta)) = M \text{ in } N \ x \ y) = (\text{let } ((x : \alpha), (y : \beta)) = M \text{ in } P \ (N \ x \ y))$                                                                                                                                                                                                                                     |
| $\forall (R : \alpha \rightarrow \alpha \rightarrow \text{bool}). \text{rcdiamond } R \Leftrightarrow \text{diamond } (RC \ R)$                                                                                                                                                                                                                                                                                                                                                                          |
| $\forall (s : \alpha \rightarrow \text{bool}). \neg (\bigcup (\alpha) \subset s)$                                                                                                                                                                                                                                                                                                                                                                                                                        |
| $\forall (l : (\alpha \# \beta) \text{ list}). \text{ZIP } (\text{UNZIP } l) = l$                                                                                                                                                                                                                                                                                                                                                                                                                        |
| $\forall (P : \alpha \rightarrow \text{bool}). \text{BIGINTER } \{P\} = P$                                                                                                                                                                                                                                                                                                                                                                                                                               |
| $\forall (M : 'a1 \# 'a2) (N : 'a1 \rightarrow 'a2 \rightarrow \beta \rightarrow \gamma) (b : \beta). (\text{let } ((x : 'a1), (y : 'a2)) = M \text{ in } N \ x \ y) \ b = (\text{let } ((x : 'a1), (y : 'a2)) = M \text{ in } N \ x \ y \ b)$                                                                                                                                                                                                                                                           |
| $(\forall (x : \alpha). x \in (s : \alpha \rightarrow \text{bool}) \Rightarrow (\text{INR } x : \beta + \alpha) \in (t : \beta + \alpha \rightarrow \text{bool})) \Rightarrow \text{INJ } (\text{INR } : \alpha \rightarrow \beta + \alpha) \ s \ t$                                                                                                                                                                                                                                                     |
| $\forall (n : \text{num}) (m : \text{num}). n < m \Rightarrow \text{tri } n < \text{tri } m$                                                                                                                                                                                                                                                                                                                                                                                                             |
| $\forall (m : \text{num}) (n : \text{num}). \text{SUC } m < n \Rightarrow m < n$                                                                                                                                                                                                                                                                                                                                                                                                                         |
| $\text{transitive } (R : \alpha \rightarrow \alpha \rightarrow \text{bool})^{\wedge} =$                                                                                                                                                                                                                                                                                                                                                                                                                  |
| $\forall (s : \alpha \rightarrow \text{bool}) (t : \alpha \rightarrow \text{bool}). s = t \Rightarrow s \subseteq t \wedge t \subseteq s$                                                                                                                                                                                                                                                                                                                                                                |
| $\forall (l : \alpha \text{ list}) (n : \text{num}). n < \text{LENGTH } (\text{FRONT } l) \wedge \neg \text{NULL } l \Rightarrow \text{EL } n \ (\text{FRONT } l) = \text{EL } n \ l$                                                                                                                                                                                                                                                                                                                    |
| $(s0 : \alpha \rightarrow \text{bool}) \subseteq (s : \alpha \rightarrow \text{bool}) \wedge \text{INJ } (f : \alpha \rightarrow \beta) \ s \ (t : \beta \rightarrow \text{bool}) \Rightarrow \text{BIJ } f \ s0 \ (\text{IMAGE } f \ s0)$                                                                                                                                                                                                                                                               |
| $\forall (n : \text{num}). \text{LENGTH } (l1 : \alpha \text{ list}) < n \Rightarrow \text{TAKE } n \ (l1 ++ (l2 : \alpha \text{ list})) = l1 ++ \text{TAKE } (n - \text{LENGTH } l1) \ l2$                                                                                                                                                                                                                                                                                                              |
| $\forall (x : \alpha + \beta). \text{ISL } x \Rightarrow (\text{INL } (\text{OUTL } x) : \alpha + \beta) = x$                                                                                                                                                                                                                                                                                                                                                                                            |
| $\forall (s : \text{num} \rightarrow \text{bool}). \text{FINITE } s \Rightarrow \forall (e : \text{num}). \text{SUM\_SET } (s \ \text{DELETE } e) = \text{if } e \in s \text{ then } \text{SUM\_SET } s - e \text{ else } \text{SUM\_SET } s$                                                                                                                                                                                                                                                            |
| $\forall (f : \alpha \rightarrow \beta). \text{IMAGE } f \ (\emptyset : \alpha \rightarrow \text{bool}) = (\emptyset : \beta \rightarrow \text{bool})$                                                                                                                                                                                                                                                                                                                                                   |
| $\forall (m : \text{num}) (n : \text{num}). n \leq n \otimes m$                                                                                                                                                                                                                                                                                                                                                                                                                                          |
| $\forall (l : \alpha \text{ list}) (x : \alpha). \text{MEM } x \ (\text{TL } l) \Rightarrow \text{MEM } x \ l$                                                                                                                                                                                                                                                                                                                                                                                           |
| $\forall (R : \alpha \rightarrow \alpha \rightarrow \text{bool}) (s : \alpha \rightarrow \text{bool}) (t : \alpha \rightarrow \text{bool}). \text{pairwise } R \ t \wedge s \subseteq t \Rightarrow \text{pairwise } R \ s$                                                                                                                                                                                                                                                                              |
| $\neg \neg (p : \text{bool}) \Rightarrow p$                                                                                                                                                                                                                                                                                                                                                                                                                                                              |
| $\forall (s : \alpha \rightarrow \text{bool}). (\emptyset : \alpha \rightarrow \text{bool}) \in \text{POW } s$                                                                                                                                                                                                                                                                                                                                                                                           |
| $\forall (l : \alpha \text{ list}). \neg \text{NULL } l \Rightarrow \text{HD } l :: \text{TL } l = l$                                                                                                                                                                                                                                                                                                                                                                                                    |
| $\forall (x : \alpha) (y : \alpha \text{ list}). \text{FRONT } (x :: y) \leq x :: y$                                                                                                                                                                                                                                                                                                                                                                                                                     |
| $\$! \ (\text{UNCURRY } (f : \alpha \rightarrow \beta \rightarrow \text{bool})) \Leftrightarrow \$! \ ((\$! : (\beta \rightarrow \text{bool}) \rightarrow \text{bool}) \circ f)$                                                                                                                                                                                                                                                                                                                         |
| $\forall (n : \text{num}) (l : \alpha \text{ list}). n \leq \text{LENGTH } l \Rightarrow \forall (x : \alpha). \text{LASTN } n \ (x :: l) = \text{LASTN } n \ l$                                                                                                                                                                                                                                                                                                                                         |
| $\forall (x : \alpha). \text{SOME } x \neq (\text{NONE} : \alpha \text{ option})$                                                                                                                                                                                                                                                                                                                                                                                                                        |
| $\forall (R : \alpha \rightarrow \alpha \rightarrow \text{bool}). \text{symmetric } (\text{SC } R)$                                                                                                                                                                                                                                                                                                                                                                                                      |
| $\forall (l1 : \alpha \text{ list}) (l1' : \alpha \text{ list}) (l2 : \beta \text{ list}) (l2' : \beta \text{ list}) (P : \alpha \rightarrow \beta \rightarrow \text{bool}) (P' : \alpha \rightarrow \beta \rightarrow \text{bool}). l1 = l1' \wedge l2 = l2' \wedge (\forall (x : \alpha) (y : \beta). \text{MEM } x \ l1' \wedge \text{MEM } y \ l2' \Rightarrow (P \ x \ y \Leftrightarrow P' \ x \ y)) \Rightarrow (\text{LIST\_REL } P \ l1 \ l2 \Leftrightarrow \text{LIST\_REL } P' \ l1' \ l2')$ |
| $\forall (p : \alpha \# \beta) (f : \alpha \rightarrow \gamma) (g : \beta \rightarrow \delta). \text{SND } ((f \ ## \ g) \ p) = g \ (\text{SND } p)$                                                                                                                                                                                                                                                                                                                                                     |

|                                                                                                                                                                                                                                                                                                                                                                     |
|---------------------------------------------------------------------------------------------------------------------------------------------------------------------------------------------------------------------------------------------------------------------------------------------------------------------------------------------------------------------|
| $\text{ind\_type\$ISO } (f : \alpha \rightarrow \gamma) (f' : \gamma \rightarrow \alpha) \wedge \text{ind\_type\$ISO } (g : \beta \rightarrow \delta) (g' : \delta \rightarrow \beta) \Rightarrow \text{ind\_type\$ISO } (\lambda(h : \alpha \rightarrow \beta) (a' : \gamma). g (h (f' a')))) (\lambda(h : \gamma \rightarrow \delta) (a : \alpha). g' (h (f a)))$ |
| $\forall (R : \alpha \rightarrow \alpha \rightarrow \text{bool}). \text{symmetric } R \Rightarrow R^T = R$                                                                                                                                                                                                                                                          |
| $\forall (l1 : \alpha \text{ list}) (n : \text{num}). \text{LENGTH } l1 \leq n \Rightarrow \forall (l2 : \alpha \text{ list}). \text{DROP } n (l1 ++ l2) = \text{DROP } (n - \text{LENGTH } l1) l2$                                                                                                                                                                 |
| $\forall (n : \text{num}) (l1 : \alpha \text{ list}). n \leq \text{LENGTH } l1 \Rightarrow \forall (l2 : \alpha \text{ list}). \text{TAKE } n (l1 ++ l2) = \text{TAKE } n l1$                                                                                                                                                                                       |
| $\forall (l1 : \alpha \text{ list}) (l2 : \alpha \text{ list}). \text{LENGTH } (l1 ++ l2) = \text{LENGTH } l1 + \text{LENGTH } l2$                                                                                                                                                                                                                                  |
| $\forall (s : \alpha \rightarrow \text{bool}) (t : \alpha \rightarrow \text{bool}). s \subseteq t \Leftrightarrow \forall (x : \alpha). s x \Rightarrow t x$                                                                                                                                                                                                        |
| $\forall (P : \alpha \rightarrow \text{bool}) (l : \alpha \text{ list}). \text{EVERY } P l \Leftrightarrow \text{FOLDR } \$ \backslash T (\text{MAP } P l)$                                                                                                                                                                                                         |
| $\forall (l1 : \alpha \text{ list}) (l2 : \alpha \text{ list}). \text{DROP } (\text{LENGTH } l1) (l1 ++ l2) = l2$                                                                                                                                                                                                                                                   |
| $\forall (f : 'z \rightarrow 'z). \text{INVOL } f \Leftrightarrow \forall (x : 'z). f (f x) = x$                                                                                                                                                                                                                                                                    |
| $\forall (R : \alpha \rightarrow \alpha \rightarrow \text{bool}). \text{antisymmetric } R^T \Leftrightarrow \text{antisymmetric } R$                                                                                                                                                                                                                                |
| $\forall (P : \alpha \rightarrow \text{bool}). P \times (\emptyset : \beta \rightarrow \text{bool}) = (\emptyset : \alpha \# \beta \rightarrow \text{bool}) \wedge (\emptyset : \gamma \rightarrow \text{bool}) \times P = (\emptyset : \gamma \# \alpha \rightarrow \text{bool})$                                                                                  |
| $\forall (P : \alpha \rightarrow \text{bool}) (l : \alpha \text{ list}). \text{EVERY } P l \Leftrightarrow \text{FOLDR } (\lambda(x : \alpha) (l' : \text{bool}). P x \wedge l') T l$                                                                                                                                                                               |
| $\neg \text{NULL } (l2 : \alpha \text{ list}) \wedge (n : \text{num}) = \text{LENGTH } (l1 : \alpha \text{ list}) \Rightarrow \text{EL } n (l1 ++ l2) = \text{HD } l2$                                                                                                                                                                                              |
| $(r1 : \alpha) = (r2 : \alpha) \Rightarrow (\text{Abbrev } ((v : \alpha) = r1) \Leftrightarrow \text{Abbrev } (v = r2))$                                                                                                                                                                                                                                            |
| $\text{MAP2 } (f : \beta \rightarrow \gamma \rightarrow \alpha) (x : \beta \text{ list}) ([ ] : \gamma \text{ list}) = ([ ] : \alpha \text{ list})$                                                                                                                                                                                                                 |
| $\forall (c : \alpha \text{ list}) (a : \alpha \text{ list}). a \leq a ++ c$                                                                                                                                                                                                                                                                                        |
| $\forall (P : \alpha \rightarrow \text{bool}) (Q : \alpha \rightarrow \text{bool}) (l : \alpha \text{ list}). (\text{EXISTS } (\lambda(x : \alpha). P x \vee Q x) l) \Leftrightarrow \text{EXISTS } P l \vee \text{EXISTS } Q l$                                                                                                                                    |
| $\forall (x : \alpha \text{ option}). \neg \text{IS\_SOME } x \Leftrightarrow x = (\text{NONE} : \alpha \text{ option})$                                                                                                                                                                                                                                            |
| $\text{OPTION\_MAP2 } (f : \alpha \rightarrow \beta \rightarrow \gamma) (o1 : \alpha \text{ option}) (o2 : \beta \text{ option}) = (\text{NONE} : \gamma \text{ option}) \Leftrightarrow o1 = (\text{NONE} : \alpha \text{ option}) \vee o2 = (\text{NONE} : \beta \text{ option})$                                                                                 |
| $\forall (l1 : \alpha \text{ list}) (l2 : \alpha \text{ list}). \text{REVERSE } l1 = l2 \Leftrightarrow l1 = \text{REVERSE } l2$                                                                                                                                                                                                                                    |
| $\forall (s : \text{num} \rightarrow \text{bool}). \text{countable } s$                                                                                                                                                                                                                                                                                             |
| $\forall (P : \alpha \rightarrow \text{bool}) (l : \alpha \text{ list}). \text{EXISTS } P l \Leftrightarrow \exists (e : \alpha). \text{MEM } e l \wedge P e$                                                                                                                                                                                                       |
| $\forall (x : \alpha) (l : \alpha \text{ list}). \text{MEM } x l \Leftrightarrow \text{FOLDR } \$ \backslash F (\text{MAP } (\$ = x) l)$                                                                                                                                                                                                                            |
| $\text{symmetric } (R : \alpha \rightarrow \alpha \rightarrow \text{bool}) \Leftrightarrow R^T \subseteq_r R$                                                                                                                                                                                                                                                       |
| $\text{OPTION\_IGNORE\_BIND } (\text{NONE} : \beta \text{ option}) (m : \alpha \text{ option}) = (\text{NONE} : \alpha \text{ option}) \wedge \text{OPTION\_IGNORE\_BIND } (\text{SOME } (v : \gamma)) m = m$                                                                                                                                                       |
| $\forall (s : \alpha \rightarrow \text{bool}) (t : \alpha \rightarrow \text{bool}). s \cap t = t \cap s$                                                                                                                                                                                                                                                            |
| $\forall (p : \text{bool}) (q : \text{bool}) (m : \text{bool}). (p \wedge \text{stmarker } m \Leftrightarrow \text{stmarker } m \wedge p) \wedge ((\text{stmarker } m \wedge p) \wedge q \Leftrightarrow \text{stmarker } m \wedge p \wedge q) \wedge (p \wedge \text{stmarker } m \wedge q \Leftrightarrow \text{stmarker } m \wedge p \wedge q)$                  |
| $\forall (x : \alpha) (l : \alpha \text{ list}). \text{SNOC } x l = \text{REVERSE } (x :: \text{REVERSE } l)$                                                                                                                                                                                                                                                       |
| $\text{SURJ } (f : \alpha \rightarrow \beta) (s : \alpha \rightarrow \text{bool}) (\text{IMAGE } f s)$                                                                                                                                                                                                                                                              |
| $\text{PMATCH\_ROW } (p : \beta \rightarrow \gamma) (g : \beta \rightarrow \text{bool}) (r : \beta \rightarrow \alpha) (i : \gamma) = \text{SOME } (y : \alpha) \Rightarrow \exists (x : \beta). \text{PMATCH\_ROW\_COND } p g i x \wedge y = r x$                                                                                                                  |
| $\forall (x : \alpha) (sos : (\alpha \rightarrow \text{bool}) \rightarrow \text{bool}). \text{BIGUNION } sos x \Leftrightarrow \exists (s : \alpha \rightarrow \text{bool}). x \in s \wedge s \in sos$                                                                                                                                                              |
| $(\forall (p : \alpha \# \beta). (P : \alpha \# \beta \rightarrow \text{bool}) p) \Leftrightarrow \forall (p\_1 : \alpha) (p\_2 : \beta). P (p\_1, p\_2)$                                                                                                                                                                                                           |
| $\forall (f : \alpha \rightarrow \beta) (s : \beta \rightarrow \text{bool}) (t : \beta \rightarrow \text{bool}). \text{PREIMAGE } f (s \cap t) = \text{PREIMAGE } f s \cap \text{PREIMAGE } f t$                                                                                                                                                                    |
| $\forall (s : \alpha \rightarrow \text{bool}). (\exists (x : \alpha). x \in s) \Leftrightarrow s \neq (\emptyset : \alpha \rightarrow \text{bool})$                                                                                                                                                                                                                 |
| $(\text{diag } (A : \alpha \rightarrow \text{bool}))^T = \text{diag } A$                                                                                                                                                                                                                                                                                            |
| $\forall (f : \alpha \rightarrow \text{bool}) (n : \text{num}) (x : \alpha). \text{EVERY } f (\text{REPLICATE } n x) \Leftrightarrow n = (0 : \text{num}) \vee f x$                                                                                                                                                                                                 |

|                                                                                                                                                                                                                                                                                                                                                                                                                                                                                                                                                                                                                                                                                                                                                                              |
|------------------------------------------------------------------------------------------------------------------------------------------------------------------------------------------------------------------------------------------------------------------------------------------------------------------------------------------------------------------------------------------------------------------------------------------------------------------------------------------------------------------------------------------------------------------------------------------------------------------------------------------------------------------------------------------------------------------------------------------------------------------------------|
| $\{x \mid x = (y : \alpha)\} = \{y\}$                                                                                                                                                                                                                                                                                                                                                                                                                                                                                                                                                                                                                                                                                                                                        |
| $\text{transitive } (\$ \text{PSUBSET } :(\alpha \rightarrow \text{bool}) \rightarrow (\alpha \rightarrow \text{bool}) \rightarrow \text{bool})$                                                                                                                                                                                                                                                                                                                                                                                                                                                                                                                                                                                                                             |
| $\forall (f : \alpha \rightarrow \beta \rightarrow \gamma). \text{CURRY } (\text{UNCURRY } f) = f$                                                                                                                                                                                                                                                                                                                                                                                                                                                                                                                                                                                                                                                                           |
| $\forall (e : \alpha) (l1 : \alpha \text{ list}) (l2 : \alpha \text{ list}). \text{MEM } e (l1 ++ l2) \Leftrightarrow \text{MEM } e l1 \vee \text{MEM } e l2$                                                                                                                                                                                                                                                                                                                                                                                                                                                                                                                                                                                                                |
| $\forall (x : \alpha \text{ list}) (y : \alpha \text{ list}). x \leq y \wedge y \leq x \Rightarrow x = y$                                                                                                                                                                                                                                                                                                                                                                                                                                                                                                                                                                                                                                                                    |
| $\forall (P : \alpha \rightarrow \text{bool}) (L : \alpha \text{ list}) (M : \alpha \text{ list}). \text{FILTER } P (L ++ M) = \text{FILTER } P L ++ \text{FILTER } P M$                                                                                                                                                                                                                                                                                                                                                                                                                                                                                                                                                                                                     |
| $(\forall (x : \alpha) (y : \alpha). (R : \alpha \rightarrow \alpha \rightarrow \text{bool}) x y \Rightarrow (Q : \alpha \rightarrow \alpha \rightarrow \text{bool}) x y) \Rightarrow \text{SC } R (x : \alpha) (y : \alpha) \Rightarrow \text{SC } Q x y$                                                                                                                                                                                                                                                                                                                                                                                                                                                                                                                   |
| $\forall (P : \alpha \rightarrow \text{bool}) (l : \alpha \text{ list}). \neg \text{EXISTS } P l \Leftrightarrow \text{EVERY } (\$ \neg \circ P) l$                                                                                                                                                                                                                                                                                                                                                                                                                                                                                                                                                                                                                          |
| $\forall (x : \text{bool}) (x' : \text{bool}) (y : \text{bool}) (y' : \text{bool}). (x \Rightarrow x') \wedge (x' \Rightarrow y' \Rightarrow y) \Rightarrow (x' \Rightarrow y') \Rightarrow x \Rightarrow y$                                                                                                                                                                                                                                                                                                                                                                                                                                                                                                                                                                 |
| $\forall (l : \alpha \text{ list}) (e : \alpha) (y : \alpha). \text{MEM } y (\text{FRONT } (e::l)) \Rightarrow \text{MEM } y (e::l)$                                                                                                                                                                                                                                                                                                                                                                                                                                                                                                                                                                                                                                         |
| $(\forall (l1 : \alpha \text{ list}) (l2 : \alpha \text{ list}). l1 ++ l2 = l1 \Leftrightarrow l2 = ([] : \alpha \text{ list})) \wedge (\forall (l1 : \alpha \text{ list}) (l2 : \alpha \text{ list}). l1 ++ l2 = l2 \Leftrightarrow l1 = ([] : \alpha \text{ list})) \wedge (\forall (l1 : \alpha \text{ list}) (l2 : \alpha \text{ list}). l1 = l1 ++ l2 \Leftrightarrow l2 = ([] : \alpha \text{ list})) \wedge \forall (l1 : \alpha \text{ list}) (l2 : \alpha \text{ list}). l2 = l1 ++ l2 \Leftrightarrow l1 = ([] : \alpha \text{ list})$                                                                                                                                                                                                                             |
| $\forall (x : \alpha). \text{ALL\_DISTINCT } [x]$                                                                                                                                                                                                                                                                                                                                                                                                                                                                                                                                                                                                                                                                                                                            |
| $\forall (s : \alpha \rightarrow \text{bool}). \text{FINITE } s \Rightarrow \forall (x : \alpha). \text{CARD } (x \text{ INSERT } s) = \text{if } x \in s \text{ then CARD } s \text{ else SUC } (\text{CARD } s)$                                                                                                                                                                                                                                                                                                                                                                                                                                                                                                                                                           |
| $\forall (m : \text{num}) (n : \text{num}). m \leq n \otimes m$                                                                                                                                                                                                                                                                                                                                                                                                                                                                                                                                                                                                                                                                                                              |
| $\forall (l : \alpha \text{ list}) (l1 : \alpha \text{ list}) (l2 : \alpha \text{ list}). l1 \leq l \wedge l2 \leq l \Rightarrow l1 \leq l2 \vee l2 \leq l1$                                                                                                                                                                                                                                                                                                                                                                                                                                                                                                                                                                                                                 |
| $\forall (A : \text{bool}). A \Rightarrow \neg A \Rightarrow F$                                                                                                                                                                                                                                                                                                                                                                                                                                                                                                                                                                                                                                                                                                              |
| $\forall (f : \alpha \rightarrow \beta) (l : \alpha \text{ list}). \text{set } (\text{MAP } f l) = \text{IMAGE } f (\text{set } l)$                                                                                                                                                                                                                                                                                                                                                                                                                                                                                                                                                                                                                                          |
| $\forall (x : \alpha) (s : \alpha \rightarrow \text{bool}) (t : \alpha \rightarrow \text{bool}). (x \text{ INSERT } s) \cap t = \text{if } x \in t \text{ then } x \text{ INSERT } s \cap t \text{ else } s \cap t$                                                                                                                                                                                                                                                                                                                                                                                                                                                                                                                                                          |
| $\forall (ls : \alpha \text{ list}) (n : \text{num}). n < \text{LENGTH } ls \Rightarrow \text{TAKE } (n + (1 : \text{num})) ls = \text{SNOC } (\text{EL } n ls) (\text{TAKE } n ls)$                                                                                                                                                                                                                                                                                                                                                                                                                                                                                                                                                                                         |
| $\text{OPTION\_MAP2 } (f : \beta \rightarrow \gamma \rightarrow \alpha) (\text{SOME } (x : \beta)) (\text{SOME } (y : \gamma)) = \text{SOME } (f x y) \wedge \text{OPTION\_MAP2 } f (\text{SOME } x) (\text{NONE } : \gamma \text{ option}) = (\text{NONE } : \alpha \text{ option}) \wedge \text{OPTION\_MAP2 } f (\text{NONE } : \beta \text{ option}) (\text{NONE } : \gamma \text{ option}) = (\text{NONE } : \alpha \text{ option})$                                                                                                                                                                                                                                                                                                                                    |
| $\forall (R1 : \alpha \rightarrow \alpha \rightarrow \text{bool}) (R2 : \beta \rightarrow \beta \rightarrow \text{bool}) (v1 : \alpha \# \beta) (v2 : \alpha \# \beta) (R1' : \alpha \rightarrow \alpha \rightarrow \text{bool}) (R2' : \beta \rightarrow \beta \rightarrow \text{bool}) (v1' : \alpha \# \beta) (v2' : \alpha \# \beta). v1 = v1' \wedge v2 = v2' \wedge (\forall (a : \alpha) (b : \beta) (c : \alpha) (d : \beta). v1' = (a, b) \wedge v2' = (c, d) \Rightarrow (R1 a c \Leftrightarrow R1' a c)) \wedge (\forall (a : \alpha) (b : \beta) (c : \alpha) (d : \beta). v1' = (a, b) \wedge v2' = (c, d) \wedge a = c \Rightarrow (R2 b d \Leftrightarrow R2' b d)) \Rightarrow ((R1 \text{ LEX } R2) v1 v2 \Leftrightarrow (R1' \text{ LEX } R2') v1' v2')$ |
| $\forall (f : \alpha \rightarrow \beta) (R : \alpha \rightarrow \alpha \rightarrow \text{bool}) (D : \alpha \rightarrow \text{bool}) (P : \alpha \rightarrow \beta \rightarrow \text{bool}) (M : (\alpha \rightarrow \beta) \rightarrow \alpha \rightarrow \beta) (x : \alpha). f = \text{WFREC } R M \wedge \text{WF } R \wedge \text{INDUCTIVE\_INVARIANT\_ON } R D P M \wedge D x \Rightarrow P x (f x)$                                                                                                                                                                                                                                                                                                                                                                  |
| $\forall (x : \text{bool}) (y : \alpha \rightarrow \text{bool}). (K x : \alpha \rightarrow \text{bool}) \subseteq y \Leftrightarrow \neg x \vee \bigcup (\alpha) \subseteq y$                                                                                                                                                                                                                                                                                                                                                                                                                                                                                                                                                                                                |
| $(\text{OPTREL } (R : \alpha \rightarrow \beta \rightarrow \text{bool}) (\text{SOME } (x : \alpha)) (\text{NONE } : \beta \text{ option}) \Leftrightarrow F) \wedge (\text{OPTREL } R (\text{NONE } : \alpha \text{ option}) (\text{SOME } (y : \beta)) \Leftrightarrow F) \wedge (\text{OPTREL } R (\text{NONE } : \alpha \text{ option}) (\text{NONE } : \beta \text{ option}) \Leftrightarrow T) \wedge (\text{OPTREL } R (\text{SOME } x) (\text{SOME } y) \Leftrightarrow R x y)$                                                                                                                                                                                                                                                                                       |
| $\forall (s : \alpha \rightarrow \text{bool}). \text{SING } s \Rightarrow \text{FINITE } s$                                                                                                                                                                                                                                                                                                                                                                                                                                                                                                                                                                                                                                                                                  |
| $\forall (s : \alpha + \beta) (s' : \alpha + \beta) (P : \alpha \rightarrow \text{bool}) (P' : \alpha \rightarrow \text{bool}) (Q : \beta \rightarrow \text{bool}) (Q' : \beta \rightarrow \text{bool}). s = s' \wedge (\forall (a : \alpha). s' = (\text{INL } a : \alpha + \beta) \Rightarrow (P a \Leftrightarrow P' a)) \wedge (\forall (b : \beta). s' = (\text{INR } b : \alpha + \beta) \Rightarrow (Q b \Leftrightarrow Q' b)) \Rightarrow (\text{SUM\_ALL } P Q s \Leftrightarrow \text{SUM\_ALL } P' Q' s')$                                                                                                                                                                                                                                                       |
| $\forall (f : \alpha \rightarrow \beta) (M : (\alpha \rightarrow \text{bool}) \rightarrow \text{bool}). \text{IMAGE } f (\text{BIGUNION } M) = \text{BIGUNION } (\text{IMAGE } (\text{IMAGE } f) M)$                                                                                                                                                                                                                                                                                                                                                                                                                                                                                                                                                                         |
| $\forall (s : \alpha \rightarrow \text{bool}) (t : \alpha \rightarrow \text{bool}) (x : \alpha). s \text{ DIFF } (x \text{ INSERT } t) = s \text{ DELETE } x \text{ DIFF } t$                                                                                                                                                                                                                                                                                                                                                                                                                                                                                                                                                                                                |

|                                                                                                                                                                                                                                                                      |
|----------------------------------------------------------------------------------------------------------------------------------------------------------------------------------------------------------------------------------------------------------------------|
| $\forall(v:\alpha) (p:\beta \rightarrow \alpha) (g:\beta \rightarrow \text{bool}). (\forall(x:\beta). \neg g x) \Rightarrow (\text{PMATCH\_ROW\_COND\_EX } v \ p \ g \Leftrightarrow F)$                                                                             |
| $(\forall(x:\alpha) (y:\alpha). (f:\alpha \rightarrow \beta) x = f y \Leftrightarrow x = y) \Rightarrow (\text{IMAGE } f (s1:\alpha \rightarrow \text{bool}) = \text{IMAGE } f (s2:\alpha \rightarrow \text{bool}) \Leftrightarrow s1 = s2)$                         |
| $\forall(R:\alpha \rightarrow \alpha \rightarrow \text{bool}). \text{transitive } R^T \Leftrightarrow \text{transitive } R$                                                                                                                                          |
| $\forall(t:\text{bool}). T \vee t \Leftrightarrow T$                                                                                                                                                                                                                 |
| $\forall(t:\text{bool}). t \wedge F \Leftrightarrow F$                                                                                                                                                                                                               |
| $\forall(t:\text{bool}). T \wedge t \Leftrightarrow t$                                                                                                                                                                                                               |
| $\forall(f:\alpha \rightarrow \beta \# \text{bool}). (\forall(x:\alpha). \neg \text{SND } (f x)) \Rightarrow \text{GSPEC } f = (\emptyset:\beta \rightarrow \text{bool})$                                                                                            |
| $\forall(R:\alpha \rightarrow \alpha \rightarrow \text{bool}). \text{equivalence } R \Rightarrow R^T = R$                                                                                                                                                            |
| $(\forall(x:\alpha) (y:\alpha). (R:\alpha \rightarrow \alpha \rightarrow \text{bool}) x y \Rightarrow R ((f:\alpha \rightarrow \alpha) x) (f y)) \Rightarrow \forall(x:\alpha) (y:\alpha). \text{RC } R \ x \ y \Rightarrow \text{RC } R \ (f x) \ (f y)$            |
| $\text{SND } (p:\beta \# \alpha) = (y:\alpha) \Leftrightarrow \exists(x:\beta). p = (x,y)$                                                                                                                                                                           |
| $\forall(P:\text{num} \rightarrow \text{bool}). P \ (0:\text{num}) \wedge (\forall(n:\text{num}). P \ n \Rightarrow P \ (\text{SUC } n)) \Rightarrow \forall(n:\text{num}). P \ n$                                                                                   |
| $(\forall(x:\alpha). (P:\alpha \rightarrow \text{bool}) x \Rightarrow (Q:\alpha \text{ option} \rightarrow \text{bool}) (\text{SOME } x)) \wedge ((\forall(x:\alpha). \neg P \ x) \Rightarrow Q \ (\text{NONE}:\alpha \text{ option})) \Rightarrow Q \ (\$some \ P)$ |
| $\forall(l:\alpha \text{ list}). l \neq ([]:\alpha \text{ list}) \Rightarrow \text{ELL } (\text{PRE } (\text{LENGTH } l)) \ l = \text{HD } l$                                                                                                                        |
| $\forall(n1:\text{num}) (n2:\text{num}) (x:\alpha). n1 < n2 \Rightarrow \text{EL } n1 \ (\text{REPLICATE } n2 \ x) = x$                                                                                                                                              |
| $\forall(n:\text{num}) (l1:\alpha \text{ list}) (l2:\alpha \text{ list}). n < \text{LENGTH } l1 \Rightarrow \text{EL } n \ (l1 ++ l2) = \text{EL } n \ l1$                                                                                                           |
| $\forall(f:\alpha \rightarrow \beta) (t:\beta \rightarrow \text{bool}) (sp:\alpha \rightarrow \text{bool}). \text{PREIMAGE } f \ (\text{COMPL } t) \cap sp = sp \ \text{DIFF } \text{PREIMAGE } f \ t$                                                               |
| $\forall(x:\alpha) (s:\alpha \rightarrow \text{bool}). x \in s \Rightarrow \forall(f:\alpha \rightarrow \beta). f x \in \text{IMAGE } f \ s$                                                                                                                         |
| $\forall(l1:\alpha \text{ list}) (h:\alpha) (l2:\alpha \text{ list}) (l3:\alpha \text{ list}). l1 ++ h::l2 ++ l3 = l1 ++ h::(l2 ++ l3)$                                                                                                                              |
| $\forall(n:\text{num}). \text{count } n = \text{if } n = (0:\text{num}) \text{ then } (\emptyset:\text{num} \rightarrow \text{bool}) \text{ else } (\text{let } (p:\text{num}) = \text{PRE } n \text{ in } p \ \text{INSERT } \text{count } p)$                      |
| $\forall(x:\alpha) (s:\alpha \rightarrow \text{bool}). x \in \text{COMPL } s \Leftrightarrow x \notin s$                                                                                                                                                             |
| $\forall(l:\alpha \text{ list}) (n:\text{num}). \text{LENGTH } l \leq n \Rightarrow \text{DROP } n \ l = ([]:\alpha \text{ list})$                                                                                                                                   |
| $\forall(P:\alpha \rightarrow \text{bool}) (B:(\alpha \rightarrow \text{bool}) \rightarrow \text{bool}). \text{BIGINTER } (P \ \text{INSERT } B) = P \cap \text{BIGINTER } B$                                                                                        |
| $\forall(xs:\alpha \text{ list}) (ys:\beta \text{ list}) (P:\alpha \rightarrow \beta \rightarrow \text{bool}) (x:\alpha). \text{LIST\_REL } P \ xs \ ys \wedge \text{MEM } x \ xs \Rightarrow \exists(y:\beta). \text{MEM } y \ ys \wedge P \ x \ y$                 |
| $\text{longest\_prefix } (\emptyset:\alpha \text{ list} \rightarrow \text{bool}) = ([]:\alpha \text{ list})$                                                                                                                                                         |
| $(\forall(x:\alpha) (y:\alpha). (R:\alpha \rightarrow \alpha \rightarrow \text{bool}) x y \Rightarrow R ((f:\alpha \rightarrow \alpha) x) (f y)) \Rightarrow \forall(x:\alpha) (y:\alpha). \text{SC } R \ x \ y \Rightarrow \text{SC } R \ (f x) \ (f y)$            |
| $\forall(s:\alpha \rightarrow \text{bool}) (t:\alpha \rightarrow \text{bool}). \text{countable } s \wedge t \subseteq s \Rightarrow \text{countable } t$                                                                                                             |
| $\forall(ls:\text{num list}). \text{SUM } ls = (0:\text{num}) \Leftrightarrow \forall(x:\text{num}). \text{MEM } x \ ls \Rightarrow x = (0:\text{num})$                                                                                                              |
| $\forall(s:\alpha \rightarrow \text{bool}) (t:\alpha \rightarrow \text{bool}). \text{DISJOINT } s \ t \Leftrightarrow \text{DISJOINT } t \ s$                                                                                                                        |
| $\forall(n:\text{num}). n \leq \text{LENGTH } (l1:\alpha \text{ list}) \Rightarrow \text{TAKE } n \ (l1 ++ (l2:\alpha \text{ list})) = \text{TAKE } n \ l1$                                                                                                          |
| $\forall(xs:\alpha \text{ list}) (k:\text{num}) (n:\text{num}). \text{TAKE } k \ (\text{DROP } n \ xs) = \text{DROP } n \ (\text{TAKE } (k + n) \ xs)$                                                                                                               |
| $\forall(P1:\alpha \rightarrow \text{bool}) (P2:\alpha \rightarrow \text{bool}) (l:\alpha \text{ list}). \text{EVERY } P1 \ (\text{FILTER } P2 \ l) \Leftrightarrow \text{EVERY } (\lambda(x:\alpha). P2 \ x \Rightarrow P1 \ x) \ l$                                |
| $\forall(n:\text{num}) (l:\alpha \text{ list}). n < \text{LENGTH } l \Rightarrow \text{EL } n \ l = \text{HD } (\text{SEG } (1:\text{num}) \ n \ l)$                                                                                                                 |
| $\forall(x:\alpha \text{ option}). (\text{option\_CASE } x \ x \ (\text{SOME}:\alpha \rightarrow \alpha \text{ option}) :\alpha \text{ option}) = x$                                                                                                                 |
| $\forall(R:\alpha \rightarrow \alpha \rightarrow \text{bool}). \text{WeakOrder } R \Rightarrow \text{Order } R$                                                                                                                                                      |
| $\forall(s:\alpha \rightarrow \text{bool}) (t:\alpha \rightarrow \text{bool}) (u:\alpha \rightarrow \text{bool}). \text{DISJOINT } (s \cup t) \ u \Leftrightarrow \text{DISJOINT } s \ u \wedge \text{DISJOINT } t \ u$                                              |

|                                                                                                                                                                                                                                                                                                                                                                                                                                                                                                                                                  |
|--------------------------------------------------------------------------------------------------------------------------------------------------------------------------------------------------------------------------------------------------------------------------------------------------------------------------------------------------------------------------------------------------------------------------------------------------------------------------------------------------------------------------------------------------|
| $(s : \alpha \rightarrow \text{bool}) \subseteq (t : \alpha \rightarrow \text{bool}) \Rightarrow s \cup (t \text{ DIFF } s) = t \wedge t \text{ DIFF } s \cup s = t$                                                                                                                                                                                                                                                                                                                                                                             |
| $(\forall (s : (\alpha \rightarrow \text{bool}) \rightarrow \text{bool}) (t : \alpha \rightarrow \text{bool}). \text{DISJOINT } (\text{BIGUNION } s) \ t \Leftrightarrow \forall (s' : \alpha \rightarrow \text{bool}). s' \in s \Rightarrow \text{DISJOINT } s' \ t) \wedge \forall (s : (\alpha \rightarrow \text{bool}) \rightarrow \text{bool}) (t : \alpha \rightarrow \text{bool}). \text{DISJOINT } t \ (\text{BIGUNION } s) \Leftrightarrow \forall (s' : \alpha \rightarrow \text{bool}). s' \in s \Rightarrow \text{DISJOINT } t \ s'$ |
| $(\forall (x : \alpha) (y : \beta). (R1 : \alpha \rightarrow \beta \rightarrow \text{bool}) \ x \ y \Rightarrow (R2 : \alpha \rightarrow \beta \rightarrow \text{bool}) \ x \ y) \Rightarrow \text{LIST\_REL } R1 \ (l1 : \alpha \text{ list}) \ (l2 : \beta \text{ list}) \Rightarrow \text{LIST\_REL } R2 \ l1 \ l2$                                                                                                                                                                                                                           |
| $\forall (R : \alpha \rightarrow \alpha \rightarrow \text{bool}) (x : \alpha) (y : \alpha) (z : \alpha). R^{\wedge} = x \ y \wedge R^{\wedge} = y \ z \Rightarrow R^{\wedge} = x \ z$                                                                                                                                                                                                                                                                                                                                                            |
| $\forall (x : \alpha) (l : \alpha \text{ list}). \text{SNOC } x \ l = \text{FOLDER } (\text{CONS } : \alpha \rightarrow \alpha \text{ list} \rightarrow \alpha \text{ list}) \ [x] \ l$                                                                                                                                                                                                                                                                                                                                                          |
| $\forall (n : \text{num}) (x : \alpha). \text{REVERSE } (\text{REPLICATE } n \ x) = \text{REPLICATE } n \ x$                                                                                                                                                                                                                                                                                                                                                                                                                                     |
| $(y : \alpha) \in \{x \mid (P : \alpha \rightarrow \text{bool}) \ x\} \Leftrightarrow P \ y$                                                                                                                                                                                                                                                                                                                                                                                                                                                     |
| $\forall (P : \alpha \rightarrow \text{bool}) (x : \alpha) (l : \alpha \text{ list}). \text{EXISTS } P \ (\text{SNOC } x \ l) \Leftrightarrow P \ x \vee \text{EXISTS } P \ l$                                                                                                                                                                                                                                                                                                                                                                   |
| $\forall (v : \alpha) (\text{rows} : (\alpha \rightarrow \beta \text{ option}) \text{ list}). \text{PMATCH\_EQUIV\_ROWS } v \ \text{rows} \ \text{rows}$                                                                                                                                                                                                                                                                                                                                                                                         |
| $\forall (I : \text{num} \rightarrow \text{bool}) (J : \text{num} \rightarrow \text{bool}) (n : \alpha). I \neq (\emptyset : \text{num} \rightarrow \text{bool}) \wedge J \neq (\emptyset : \text{num} \rightarrow \text{bool}) \wedge I \subseteq J \Rightarrow \text{MIN\_SET } J \leq \text{MIN\_SET } I$                                                                                                                                                                                                                                     |
| $(\forall (x : \alpha) (y : \alpha). (P : \alpha \rightarrow \text{bool}) \ x \wedge (R : \alpha \rightarrow \alpha \rightarrow \text{bool}) \ x \ y \Rightarrow P \ y) \Rightarrow \forall (x : \alpha) (y : \alpha). P \ x \wedge \text{RC } R \ x \ y \Rightarrow P \ y$                                                                                                                                                                                                                                                                      |
| $\forall (P : \alpha \rightarrow \text{bool}) (l : \alpha \text{ list}). \neg \text{EVERY } P \ l \Leftrightarrow \text{EXISTS } (\$ \neg \circ P) \ l$                                                                                                                                                                                                                                                                                                                                                                                          |
| $\forall (m : \text{num}) (l : \alpha \text{ list}) (n : \text{num}). n \leq m \Rightarrow \text{TAKE } n \ (\text{TAKE } m \ l) = \text{TAKE } n \ l$                                                                                                                                                                                                                                                                                                                                                                                           |
| $\forall (f : \alpha \rightarrow \beta \rightarrow \beta) (e : \beta) (g : \gamma \rightarrow \alpha) (l : \gamma \text{ list}). \text{FOLDER } f \ e \ (\text{MAP } g \ l) = \text{FOLDER } (\lambda (x : \gamma) (y : \beta). f \ (g \ x) \ y) \ e \ l$                                                                                                                                                                                                                                                                                        |
| $\forall (P : \alpha \rightarrow \beta \rightarrow \text{bool}) (l1 : \alpha \text{ list}) (l2 : \beta \text{ list}) (v1 : \alpha) (v2 : \beta) (n : \text{num}). P \ v1 \ v2 \wedge \text{LIST\_REL } P \ l1 \ l2 \Rightarrow \text{LIST\_REL } P \ (\text{LUPDATE } v1 \ n \ l1) \ (\text{LUPDATE } v2 \ n \ l2)$                                                                                                                                                                                                                              |
| $\forall (P : \alpha \rightarrow \beta \rightarrow \text{bool}) (xs : \alpha \text{ list}) (ys : \beta \text{ list}) (n : \text{num}). \text{LIST\_REL } P \ xs \ ys \Rightarrow \text{LIST\_REL } P \ (\text{TAKE } n \ xs) \ (\text{TAKE } n \ ys)$                                                                                                                                                                                                                                                                                            |
| $\forall (l : \alpha \text{ list}) (m : \text{num}) (P : \alpha \rightarrow \text{bool}). \text{EXISTS } P \ (\text{TAKE } m \ l) \Rightarrow \text{EXISTS } P \ l$                                                                                                                                                                                                                                                                                                                                                                              |
| $\text{RC } (\$ \text{SUBSET } : (\alpha \rightarrow \text{bool}) \rightarrow (\alpha \rightarrow \text{bool}) \rightarrow \text{bool}) = (\$ \text{SUBSET } : (\alpha \rightarrow \text{bool}) \rightarrow (\alpha \rightarrow \text{bool}) \rightarrow \text{bool})$                                                                                                                                                                                                                                                                           |
| $\text{transitive } (R1 : \alpha \rightarrow \alpha \rightarrow \text{bool}) \wedge \text{transitive } (R2 : \beta \rightarrow \beta \rightarrow \text{bool}) \Rightarrow \text{transitive } (R1 \ \text{LEX } R2)$                                                                                                                                                                                                                                                                                                                              |
| $\forall (P : \alpha \rightarrow \text{bool}) (Q : \alpha \rightarrow \text{bool}) (l : \alpha \text{ list}). \text{EVERY } (\lambda (x : \alpha). P \ x \wedge Q \ x) \ l \Leftrightarrow \text{EVERY } P \ l \wedge \text{EVERY } Q \ l$                                                                                                                                                                                                                                                                                                       |
| $\forall (l1 : \alpha \text{ list}) (l2 : \alpha \text{ list}). l1 \neq l2 \Rightarrow \forall (h1 : \alpha) (h2 : \alpha). h1::l1 \neq h2::l2$                                                                                                                                                                                                                                                                                                                                                                                                  |
| $\forall (y : \alpha) (l : \alpha \text{ list}). \text{MEM } y \ l \Leftrightarrow \text{FOLDER } (\lambda (x : \alpha) (l' : \text{bool}). y = x \vee l') \ F \ l$                                                                                                                                                                                                                                                                                                                                                                              |
| $\forall (x : \alpha) (y : \alpha). \{x\} = \{y\} \Leftrightarrow x = y$                                                                                                                                                                                                                                                                                                                                                                                                                                                                         |
| $\forall (P : \text{unit} \rightarrow \text{bool}). P \ () \Rightarrow \forall (x : \text{unit}). P \ x$                                                                                                                                                                                                                                                                                                                                                                                                                                         |
| $\forall (s : \alpha \rightarrow \text{bool}). \text{FINITE } s \Rightarrow \forall (t : \alpha \rightarrow \text{bool}). \text{FINITE } (s \text{ DIFF } t)$                                                                                                                                                                                                                                                                                                                                                                                    |
| $\forall (m : \text{num}) (n : \text{num}) (l : \alpha \text{ list}). m + n = \text{LENGTH } l \Rightarrow \text{BUTLASTN } m \ l \ ++ \ \text{DROP } n \ l = l$                                                                                                                                                                                                                                                                                                                                                                                 |
| $\forall (l1 : \alpha \text{ list}) (l2 : \beta \text{ list}). \text{LENGTH } l1 = \text{LENGTH } l2 \Rightarrow \text{LENGTH } (\text{ZIP } (l1, l2)) = \text{LENGTH } l1 \wedge \text{LENGTH } (\text{ZIP } (l1, l2)) = \text{LENGTH } l2$                                                                                                                                                                                                                                                                                                     |
| $\forall (x : \alpha) (xs : \alpha \text{ list}). \text{LENGTH } (\text{FRONT } (x::xs)) = \text{LENGTH } xs$                                                                                                                                                                                                                                                                                                                                                                                                                                    |
| $\forall (s : \alpha \rightarrow \text{bool}). \text{COMPL } s \cap s = (\emptyset : \alpha \rightarrow \text{bool}) \wedge \text{COMPL } s \cup s = \mathbb{U} : (\alpha)$                                                                                                                                                                                                                                                                                                                                                                      |
| $\text{UNZIP } ([] : (\alpha \# \beta) \text{ list}) = ([] : \alpha \text{ list}), ([] : \beta \text{ list}) \wedge \text{UNZIP } (((x : \alpha), (y : \beta))::(t : (\alpha \# \beta) \text{ list})) = (\text{let } ((L1 : \alpha \text{ list}), (L2 : \beta \text{ list})) = \text{UNZIP } t \text{ in } (x::L1, y::L2))$                                                                                                                                                                                                                      |
| $\forall (s : \alpha \rightarrow \text{bool}) (t : \alpha \rightarrow \text{bool}) (x : \alpha). \text{DISJOINT } (s \ \text{DELETE } x) \ t \Leftrightarrow \text{DISJOINT } (t \ \text{DELETE } x) \ s$                                                                                                                                                                                                                                                                                                                                        |
| $\forall (f : \alpha \rightarrow \beta) (g : \gamma \rightarrow \alpha) (s : \gamma \rightarrow \text{bool}). \text{IMAGE } f \ (\text{IMAGE } g \ s) = \text{IMAGE } (f \circ g) \ s$                                                                                                                                                                                                                                                                                                                                                           |
| $\forall (P : \alpha \rightarrow \text{bool}) (Q : \beta \rightarrow \text{bool}) (x : \beta). P \times (x \ \text{INSERT } Q) = P \times \{x\} \cup P \times Q$                                                                                                                                                                                                                                                                                                                                                                                 |



|                                                                                                                                                                                                                                                                                                                                                                                                                                                                                                                                                                                                                                                                                                                                                  |
|--------------------------------------------------------------------------------------------------------------------------------------------------------------------------------------------------------------------------------------------------------------------------------------------------------------------------------------------------------------------------------------------------------------------------------------------------------------------------------------------------------------------------------------------------------------------------------------------------------------------------------------------------------------------------------------------------------------------------------------------------|
| $\forall(f : \alpha \rightarrow \beta) (n : \text{num}) (l : \alpha \text{ list}). \text{MAP } f (\text{TAKE } n \ l) = \text{TAKE } n (\text{MAP } f \ l)$                                                                                                                                                                                                                                                                                                                                                                                                                                                                                                                                                                                      |
| $\forall(P : \alpha \rightarrow \text{bool}) (f : \beta \rightarrow \alpha) (s : \beta \rightarrow \text{bool}). (\exists(y : \alpha). y \in \text{IMAGE } f \ s \wedge P \ y) \Leftrightarrow \exists(x : \beta). x \in s \wedge P \ (f \ x)$                                                                                                                                                                                                                                                                                                                                                                                                                                                                                                   |
| $\forall(x : \alpha) (s : \alpha \rightarrow \text{bool}). x \in \text{REST } s \Leftrightarrow x \in s \wedge x \neq \text{CHOICE } s$                                                                                                                                                                                                                                                                                                                                                                                                                                                                                                                                                                                                          |
| $\text{REPLICATE } (x : \text{num}) (y : \alpha) = ([] : \alpha \text{ list}) \Leftrightarrow x = (0 : \text{num})$                                                                                                                                                                                                                                                                                                                                                                                                                                                                                                                                                                                                                              |
| $\forall(n : \text{num}). n < \text{SUC } n$                                                                                                                                                                                                                                                                                                                                                                                                                                                                                                                                                                                                                                                                                                     |
| $\forall(x : \alpha) (y : \alpha) (s : \alpha \rightarrow \text{bool}). s \ \text{DELETE } x \ \text{DELETE } y = s \ \text{DELETE } y \ \text{DELETE } x$                                                                                                                                                                                                                                                                                                                                                                                                                                                                                                                                                                                       |
| $((p : \text{bool}) \Leftrightarrow \neg(q : \text{bool})) \Leftrightarrow (p \vee q) \wedge (\neg q \vee \neg p)$                                                                                                                                                                                                                                                                                                                                                                                                                                                                                                                                                                                                                               |
| $\text{NULL } ((l1 : \alpha \text{ list}) ++ (l2 : \alpha \text{ list})) \Leftrightarrow \text{NULL } l1 \wedge \text{NULL } l2$                                                                                                                                                                                                                                                                                                                                                                                                                                                                                                                                                                                                                 |
| $\text{IS\_SOME } (\text{OPTION\_MAP } (f : \alpha \rightarrow \beta) (x : \alpha \text{ option})) \Leftrightarrow \text{IS\_SOME } x$                                                                                                                                                                                                                                                                                                                                                                                                                                                                                                                                                                                                           |
| $\forall(M : \alpha \text{ option}) (M' : \alpha \text{ option}) (v : \beta) (f : \alpha \rightarrow \beta). M = M' \wedge (M' = (\text{NONE} : \alpha \text{ option}) \Rightarrow v = (v' : \beta)) \wedge (\forall(x : \alpha). M' = \text{SOME } x \Rightarrow f \ x = (f' : \alpha \rightarrow \beta) \ x) \Rightarrow (\text{option\_CASE } M \ v \ f : \beta) = (\text{option\_CASE } M' \ v' \ f' : \beta)$                                                                                                                                                                                                                                                                                                                               |
| $\forall(f : \alpha \rightarrow \beta) (s : \alpha \rightarrow \text{bool}) (f' : \alpha \rightarrow \beta) (s' : \alpha \rightarrow \text{bool}). s = s' \wedge (\forall(x : \alpha). x \in s' \Rightarrow f \ x = f' \ x) \Rightarrow \text{IMAGE } f \ s = \text{IMAGE } f' \ s'$                                                                                                                                                                                                                                                                                                                                                                                                                                                             |
| $\forall(x : \alpha \rightarrow \text{bool}) (P : (\alpha \rightarrow \text{bool}) \rightarrow \text{bool}). x \in P \Rightarrow x \subseteq \text{BIGUNION } P$                                                                                                                                                                                                                                                                                                                                                                                                                                                                                                                                                                                 |
| $\forall(f : \alpha \rightarrow \beta \rightarrow \gamma) (x : \alpha) (y : \beta). \text{UNCURRY } f \ (x, y) = f \ x \ y$                                                                                                                                                                                                                                                                                                                                                                                                                                                                                                                                                                                                                      |
| $\forall(sp : \alpha \rightarrow \text{bool}) (s : (\alpha \rightarrow \text{bool}) \rightarrow \text{bool}). (\forall(t : \alpha \rightarrow \text{bool}). t \in s \Rightarrow t \subseteq sp) \wedge s \neq (\emptyset : (\alpha \rightarrow \text{bool}) \rightarrow \text{bool}) \Rightarrow \text{BIGINTER } s \subseteq sp$                                                                                                                                                                                                                                                                                                                                                                                                                |
| $(\forall(s : \alpha \rightarrow \text{bool}). (\emptyset : \alpha \rightarrow \text{bool}) \cup s = s) \wedge \forall(s : \alpha \rightarrow \text{bool}). s \cup (\emptyset : \alpha \rightarrow \text{bool}) = s$                                                                                                                                                                                                                                                                                                                                                                                                                                                                                                                             |
| $\forall(l : \alpha \text{ list}). l \neq ([] : \alpha \text{ list}) \Rightarrow \text{TAKE } (\text{PRE } (\text{LENGTH } l)) \ l = \text{FRONT } l$                                                                                                                                                                                                                                                                                                                                                                                                                                                                                                                                                                                            |
| $\forall(f : \alpha \rightarrow \beta \rightarrow \alpha) (e : \alpha) (l1 : \beta \text{ list}) (l2 : \beta \text{ list}). \text{FOLDL } f \ e \ (l1 ++ l2) = \text{FOLDL } f \ (\text{FOLDL } f \ e \ l1) \ l2$                                                                                                                                                                                                                                                                                                                                                                                                                                                                                                                                |
| $\forall(R : \alpha \rightarrow \alpha \rightarrow \text{bool}). \text{WF } R \Leftrightarrow \forall(x : \alpha). \text{WFP } R \ x$                                                                                                                                                                                                                                                                                                                                                                                                                                                                                                                                                                                                            |
| $\forall(l : \alpha \text{ list list list}). \text{FLAT } (\text{FLAT } l) = \text{FLAT } (\text{MAP } (\text{FLAT} : \alpha \text{ list list} \rightarrow \alpha \text{ list}) \ l)$                                                                                                                                                                                                                                                                                                                                                                                                                                                                                                                                                            |
| $\forall(P : \alpha \rightarrow \text{bool}) (Q : \alpha \rightarrow \text{bool}) (l : \alpha \text{ list}). (\forall(x : \alpha). \text{MEM } x \ l \wedge P \ x \Rightarrow Q \ x) \wedge \text{EVERY } P \ l \Rightarrow \text{EVERY } Q \ l$                                                                                                                                                                                                                                                                                                                                                                                                                                                                                                 |
| $(x1 : \text{num}) \otimes (y1 : \text{num}) = (x2 : \text{num}) \otimes (y2 : \text{num}) \Leftrightarrow x1 = x2 \wedge y1 = y2$                                                                                                                                                                                                                                                                                                                                                                                                                                                                                                                                                                                                               |
| $(x : \alpha) \in \text{RDOM } ((R1 : \alpha \rightarrow \beta \rightarrow \text{bool}) \cup_r (R2 : \alpha \rightarrow \beta \rightarrow \text{bool})) \Leftrightarrow x \in \text{RDOM } R1 \vee x \in \text{RDOM } R2$                                                                                                                                                                                                                                                                                                                                                                                                                                                                                                                        |
| $\forall(y : \alpha) (x : \beta) (P : \alpha \rightarrow \text{bool}). P \ y \wedge x = (f : \alpha \rightarrow \beta) \ y \Rightarrow x \in \{f \ x \mid P \ x\}$                                                                                                                                                                                                                                                                                                                                                                                                                                                                                                                                                                               |
| $((\text{if } (P : \text{bool}) \text{ then } (X : \alpha \text{ option}) \text{ else } (\text{NONE} : \alpha \text{ option})) = (\text{NONE} : \alpha \text{ option}) \Leftrightarrow P \Rightarrow \text{IS\_NONE } X) \wedge ((\text{if } P \text{ then } (\text{NONE} : \alpha \text{ option}) \text{ else } X) = (\text{NONE} : \alpha \text{ option}) \Leftrightarrow \text{IS\_SOME } X \Rightarrow P) \wedge ((\text{if } P \text{ then } X \text{ else } (\text{NONE} : \alpha \text{ option})) = \text{SOME } (x : \alpha) \Leftrightarrow P \wedge X = \text{SOME } x) \wedge ((\text{if } P \text{ then } (\text{NONE} : \alpha \text{ option}) \text{ else } X) = \text{SOME } x \Leftrightarrow \neg P \wedge X = \text{SOME } x)$ |
| $(\forall(x : \alpha). x \in (s : \alpha \rightarrow \text{bool}) \Rightarrow (\text{INL } x : \alpha + \beta) \in (t : \alpha + \beta \rightarrow \text{bool})) \Rightarrow \text{INJ } (\text{INL} : \alpha \rightarrow \alpha + \beta) \ s \ t$                                                                                                                                                                                                                                                                                                                                                                                                                                                                                               |
| $\forall(m : \text{num}) (n : \text{num}). m < n \Rightarrow \text{SUC } m < \text{SUC } n$                                                                                                                                                                                                                                                                                                                                                                                                                                                                                                                                                                                                                                                      |
| $\text{PMATCH\_ROW } (p : \beta \rightarrow \gamma) (g : \beta \rightarrow \text{bool}) (r : \beta \rightarrow \alpha) (i : \gamma) \neq (\text{NONE} : \alpha \text{ option}) \Leftrightarrow \text{PMATCH\_ROW\_COND\_EX } i \ p \ g$                                                                                                                                                                                                                                                                                                                                                                                                                                                                                                          |
| $\text{OWHILE } (G : \alpha \rightarrow \text{bool}) (f : \alpha \rightarrow \alpha) (s : \alpha) = (\text{NONE} : \alpha \text{ option}) \Leftrightarrow \forall(n : \text{num}). G \ (\text{FUNPOW } f \ n \ s)$                                                                                                                                                                                                                                                                                                                                                                                                                                                                                                                               |
| $\forall(f : \alpha \rightarrow \alpha) (P : \alpha \rightarrow \text{bool}) (l : \alpha \text{ list}). (\forall(x : \alpha). P \ (f \ x) \Leftrightarrow P \ x) \Rightarrow \text{MAP } f \ (\text{FILTER } P \ l) = \text{FILTER } P \ (\text{MAP } f \ l)$                                                                                                                                                                                                                                                                                                                                                                                                                                                                                    |
| $\forall(s : \alpha \rightarrow \text{bool}). \text{COMPL } (\text{COMPL } s) = s$                                                                                                                                                                                                                                                                                                                                                                                                                                                                                                                                                                                                                                                               |
| $(y : \alpha) \in \text{RRANGE } (R : \beta \rightarrow \alpha \rightarrow \text{bool}) \Leftrightarrow \exists(x : \beta). R \ x \ y$                                                                                                                                                                                                                                                                                                                                                                                                                                                                                                                                                                                                           |

|                                                                                                                                                                                                                                                                                                                                                                                                                                                                                                                                                                         |  |
|-------------------------------------------------------------------------------------------------------------------------------------------------------------------------------------------------------------------------------------------------------------------------------------------------------------------------------------------------------------------------------------------------------------------------------------------------------------------------------------------------------------------------------------------------------------------------|--|
| $\text{LIST\_REL } (P : \alpha \rightarrow \beta \rightarrow \text{bool}) (\text{REPLICATE } (n : \text{num}) (x : \alpha)) (\text{REPLICATE } n (y : \beta)) \Leftrightarrow n > (0 : \text{num}) \Rightarrow P \times y$                                                                                                                                                                                                                                                                                                                                              |  |
| $\forall (s : \alpha \rightarrow \text{bool}) (t : \gamma \rightarrow \text{bool}) (u : \beta \rightarrow \text{bool}). (\exists (f : \alpha \rightarrow \gamma). \text{BIJ } f \ s \ t) \wedge (\exists (g : \gamma \rightarrow \beta). \text{BIJ } g \ t \ u) \Rightarrow \exists (h : \alpha \rightarrow \beta). \text{BIJ } h \ s \ u$                                                                                                                                                                                                                              |  |
| $\forall (R : \alpha \rightarrow \alpha \rightarrow \text{bool}). \text{reflexive } R \Leftrightarrow (\$ = : \alpha \rightarrow \alpha \rightarrow \text{bool}) \subseteq_r R$                                                                                                                                                                                                                                                                                                                                                                                         |  |
| $\text{DATATYPE } ((\text{sum } : (\alpha \rightarrow \alpha + \beta) \rightarrow (\beta \rightarrow \alpha + \beta) \rightarrow \gamma) (\text{INL} : \alpha \rightarrow \alpha + \beta) (\text{INR} : \beta \rightarrow \alpha + \beta))$                                                                                                                                                                                                                                                                                                                             |  |
| $\text{GENLIST } (f : \text{num} \rightarrow \alpha) (\text{SUC } (n : \text{num})) = f \ (0 : \text{num}) :: \text{GENLIST } (f \circ \text{SUC}) \ n$                                                                                                                                                                                                                                                                                                                                                                                                                 |  |
| $\forall (n : \text{num}) (l1 : \alpha \text{ list}). n \leq \text{LENGTH } l1 \Rightarrow \forall (l2 : \alpha \text{ list}). \text{DROP } n \ (l1 ++ l2) = \text{DROP } n \ l1 ++ l2$                                                                                                                                                                                                                                                                                                                                                                                 |  |
| $\forall (f : \alpha \rightarrow \beta) (x : \alpha) (l : \alpha \text{ list}). \text{MAP } f \ (\text{SNOC } x \ l) = \text{SNOC } (f \ x) \ (\text{MAP } f \ l)$                                                                                                                                                                                                                                                                                                                                                                                                      |  |
| $\text{INVOL } \$\neg$                                                                                                                                                                                                                                                                                                                                                                                                                                                                                                                                                  |  |
| $\forall (f : \alpha \rightarrow \text{num}) (x : \alpha) (y : \alpha). \text{measure } f \ x \ y \Leftrightarrow f \ x < f \ y$                                                                                                                                                                                                                                                                                                                                                                                                                                        |  |
| $\forall (f : \alpha \rightarrow \beta) (g : \alpha \rightarrow \beta). f \ (\text{EXT\_POINT } f \ g) = g \ (\text{EXT\_POINT } f \ g) \Leftrightarrow f = g$                                                                                                                                                                                                                                                                                                                                                                                                          |  |
| $\forall (t : \text{bool}). t \vee F \Leftrightarrow t$                                                                                                                                                                                                                                                                                                                                                                                                                                                                                                                 |  |
| $\forall (l : \alpha \text{ list}). \neg \text{NULL } l \Leftrightarrow \exists (e : \alpha). \text{MEM } e \ l$                                                                                                                                                                                                                                                                                                                                                                                                                                                        |  |
| $\forall (f : \alpha \rightarrow \beta \rightarrow \beta) (e : \beta) (P : \alpha \rightarrow \text{bool}) (l : \alpha \text{ list}). \text{FOLDR } f \ e \ (\text{FILTER } P \ l) = \text{FOLDR } (\lambda (x : \alpha) (y : \beta). \text{if } P \ x \text{ then } f \ x \ y \text{ else } y) \ e \ l$                                                                                                                                                                                                                                                                |  |
| $(R : \alpha \rightarrow \alpha \rightarrow \text{bool}) \text{equiv\_on } (s : \alpha \rightarrow \text{bool}) \Rightarrow \forall (t : \alpha \rightarrow \text{bool}). t \in \text{partition } R \ s \Rightarrow \forall (x : \alpha) (y : \alpha). x \in t \wedge y \in t \Rightarrow R \ x \ y$                                                                                                                                                                                                                                                                    |  |
| $\forall (v : \alpha) (rs1 : (\alpha \rightarrow \beta \text{ option}) \text{ list}) (rs2 : (\alpha \rightarrow \beta \text{ option}) \text{ list}) (i : \text{num}). i < \text{LENGTH } rs1 \Rightarrow (\text{PMATCH\_ROW\_REDUNDANT } v \ (rs1 ++ rs2) \ i \Leftrightarrow \text{PMATCH\_ROW\_REDUNDANT } v \ rs1 \ i)$                                                                                                                                                                                                                                              |  |
| $\forall (l1 : \alpha \text{ list}) (l2 : \alpha \text{ list}). \text{IS\_SUFFIX } l1 \ l2 \Leftrightarrow \text{REVERSE } l2 \preceq \text{REVERSE } l1$                                                                                                                                                                                                                                                                                                                                                                                                               |  |
| $\forall (f : \alpha \# \beta \rightarrow \gamma). \text{UNCURRY } (\text{CURRY } f) = f$                                                                                                                                                                                                                                                                                                                                                                                                                                                                               |  |
| $\text{EL } (\text{NUMERAL } (\text{BIT1 } (n : \text{num}))) ((l : \alpha) :: (ls : \alpha \text{ list})) = \text{EL } (\text{PRE } (\text{NUMERAL } (\text{BIT1 } n))) \ ls \wedge \text{EL } (\text{NUMERAL } (\text{BIT2 } n)) (l :: ls) = \text{EL } (\text{NUMERAL } (\text{BIT1 } n)) \ ls$                                                                                                                                                                                                                                                                      |  |
| $\forall (a1 : \alpha \text{ list}) (a0 : \alpha). a0 :: a1 \neq ([] : \alpha \text{ list})$                                                                                                                                                                                                                                                                                                                                                                                                                                                                            |  |
| $\forall (x : \text{num}) (y : \text{num}). x \otimes y = (0 : \text{num}) \Leftrightarrow x = (0 : \text{num}) \wedge y = (0 : \text{num})$                                                                                                                                                                                                                                                                                                                                                                                                                            |  |
| $\forall (R : \alpha \rightarrow \alpha \rightarrow \text{bool}). (\forall (x : \alpha) (y : \alpha). R \ x \ y \Rightarrow R^+ \ x \ y) \wedge \forall (x : \alpha) (y : \alpha) (z : \alpha). R^+ \ x \ y \wedge R^+ \ y \ z \Rightarrow R^+ \ x \ z$                                                                                                                                                                                                                                                                                                                 |  |
| $\forall (v\_old : \alpha) (v\_new : \beta) (\text{rows\_old} : (\alpha \rightarrow \gamma \text{ option}) \text{ list}) (\text{rows\_new} : (\beta \rightarrow \gamma \text{ option}) \text{ list}) (r\_old : \alpha \rightarrow \gamma \text{ option}) (r\_new : \beta \rightarrow \gamma \text{ option}). r\_old \ v\_old = r\_new \ v\_new \Rightarrow \text{PMATCH } v\_old \ \text{rows\_old} = \text{PMATCH } v\_new \ \text{rows\_new} \Rightarrow \text{PMATCH } v\_old \ (r\_old :: \text{rows\_old}) = \text{PMATCH } v\_new \ (r\_new :: \text{rows\_new})$ |  |
| $\forall (s : \alpha \rightarrow \text{bool}). \text{FINITE } s \Rightarrow \forall (t : \alpha \rightarrow \text{bool}). t \subseteq s \Rightarrow \text{FINITE } t$                                                                                                                                                                                                                                                                                                                                                                                                   |  |
| $\forall (f : \alpha \rightarrow \beta) (s : \alpha \rightarrow \text{bool}) (t : \beta \rightarrow \text{bool}). \text{INJ } f \ s \ t \Rightarrow \text{INJ } f \ s \ (\text{IMAGE } f \ s)$                                                                                                                                                                                                                                                                                                                                                                          |  |
| $\forall (x : \alpha) (y : \alpha) (s : \alpha \rightarrow \text{bool}). x \in y \ \text{INSERT } s \Leftrightarrow x = y \vee x \in s$                                                                                                                                                                                                                                                                                                                                                                                                                                 |  |
| $\forall (v : \alpha) (\text{rows1} : (\alpha \rightarrow \beta \text{ option}) \text{ list}) (\text{rows2} : (\alpha \rightarrow \beta \text{ option}) \text{ list}). \text{PMATCH\_EQUIV\_ROWS } v \ \text{rows1} \ \text{rows2} \Leftrightarrow \text{PMATCH\_EQUIV\_ROWS } v \ \text{rows2} \ \text{rows1}$                                                                                                                                                                                                                                                         |  |
| $(\text{antisymmetric } (R1 : \alpha \rightarrow \alpha \rightarrow \text{bool}) \Rightarrow \text{antisymmetric } (R1 \cap_r (R2 : \alpha \rightarrow \alpha \rightarrow \text{bool}))) \wedge (\text{antisymmetric } R2 \Rightarrow \text{antisymmetric } (R1 \cap_r R2))$                                                                                                                                                                                                                                                                                            |  |
| $\forall (s : \alpha \rightarrow \text{bool}) (M : \alpha \rightarrow \text{num}). (\exists (x : \alpha). x \in s) \Leftrightarrow \exists (x : \alpha). x \in s \wedge \forall (y : \alpha). y \in s \Rightarrow M \ x \leq M \ y$                                                                                                                                                                                                                                                                                                                                     |  |
| $\forall (f : \alpha \rightarrow \beta) (s : \alpha \rightarrow \text{bool}) (t : \alpha \rightarrow \text{bool}). \text{IMAGE } f \ (s \cap t) \subseteq \text{IMAGE } f \ s \cap \text{IMAGE } f \ t$                                                                                                                                                                                                                                                                                                                                                                 |  |
| $\forall (s : \alpha \rightarrow \text{bool}) (t : \alpha \rightarrow \text{bool}). s \cap t = \text{COMPL } (\text{COMPL } s \cup \text{COMPL } t)$                                                                                                                                                                                                                                                                                                                                                                                                                    |  |
| $\forall (R : \alpha \rightarrow \alpha \rightarrow \text{bool}) (P : \alpha \rightarrow \alpha \rightarrow \text{bool}). \text{WF } R \wedge (\forall (x : \alpha) (y : \alpha). P \ x \ y \Rightarrow R \ x \ y) \Rightarrow \text{WF } P$                                                                                                                                                                                                                                                                                                                            |  |

|                                                                                                                                                                                                                                                                                                                                                                                   |
|-----------------------------------------------------------------------------------------------------------------------------------------------------------------------------------------------------------------------------------------------------------------------------------------------------------------------------------------------------------------------------------|
| $\forall(f1 : \text{num} \rightarrow \alpha \rightarrow \text{bool}) (f1' : \text{num} \rightarrow \alpha \rightarrow \text{bool}) (f2 : \text{num} \rightarrow \alpha \rightarrow \text{bool}) (f2' : \text{num} \rightarrow \alpha \rightarrow \text{bool}).$<br>$\text{ind\_type\$INJP } f1 \ f2 = \text{ind\_type\$INJP } f1' \ f2' \Leftrightarrow f1 = f1' \wedge f2 = f2'$ |
| $\forall(R : \alpha \rightarrow \alpha \rightarrow \text{bool}) (x : \alpha) (y : \alpha). R^{\circ} x \ y \Leftrightarrow x = y \vee \exists(u : \alpha). R \ x \ u \wedge R^{\circ} u \ y$                                                                                                                                                                                      |
| $\forall(s : \alpha \rightarrow \text{bool}) (t : \alpha \rightarrow \text{bool}). s \cup t = t \cup s$                                                                                                                                                                                                                                                                           |
| $\forall(x : \alpha) (y : \alpha \text{ list}) (a : \alpha) (b : \alpha \text{ list}). \text{SNOC } x \ y = \text{SNOC } a \ b \Leftrightarrow x = a \wedge y = b$                                                                                                                                                                                                                |
| $\forall(n : \text{num}). \text{TAKEN } n \ ([] : \alpha \text{ list}) = ([] : \alpha \text{ list})$                                                                                                                                                                                                                                                                              |
| $\text{DROP } (n : \text{num}) (\text{REPLICATE } (m : \text{num}) (a : \alpha)) = \text{REPLICATE } (m - n) \ a$                                                                                                                                                                                                                                                                 |
| $((a : \alpha), (b : \beta)) \in \{(y, (x : \beta)) \mid (P : \alpha \rightarrow \text{bool}) \ y\} \Leftrightarrow P \ a \wedge b = x$                                                                                                                                                                                                                                           |
| $\forall(l : \alpha \text{ list list}). \text{FLAT } (\text{REVERSE } l) = \text{REVERSE } (\text{FLAT } (\text{MAP } (\text{REVERSE } : \alpha \text{ list} \rightarrow \alpha \text{ list}) \ l))$                                                                                                                                                                              |
| $\forall(n : \text{num}) (m : \text{num}) (l : \alpha \text{ list}). n + m \leq \text{LENGTH } l \Rightarrow \text{LASTN } n \ (\text{BUTLASTN } m \ l) = \text{BUTLASTN } m \ (\text{LASTN } (n + m) \ l)$                                                                                                                                                                       |
| $\forall(P : \alpha \rightarrow \text{bool}) (Q : \alpha \rightarrow \text{bool}) (l : \alpha \text{ list}). \text{FILTER } P \ (\text{FILTER } Q \ l) = \text{FILTER } (\lambda(x : \alpha). P \ x \wedge Q \ x) \ l$                                                                                                                                                            |
| $\forall(x : \alpha \text{ option}). (\text{option\_CASE } x \ (\text{NONE} : \alpha \text{ option}) \ (\text{SOME} : \alpha \rightarrow \alpha \text{ option}) : \alpha \text{ option}) = x$                                                                                                                                                                                     |
| $\text{FINITE } (\emptyset : \alpha \rightarrow \text{bool})$                                                                                                                                                                                                                                                                                                                     |
| $\forall(s : \alpha \rightarrow \text{bool}) (e : \alpha) (s2 : \alpha \rightarrow \text{bool}). s \ \text{DELETE } e \subseteq s2 \Leftrightarrow s \subseteq e \ \text{INSERT } s2$                                                                                                                                                                                             |
| $\mathbb{U}(:\alpha \rightarrow \text{bool}) = \text{POW } \mathbb{U}(:\alpha)$                                                                                                                                                                                                                                                                                                   |
| $\text{NULL } ([] : \alpha \text{ list}) \wedge \forall(h : \alpha) (t : \alpha \text{ list}). \neg \text{NULL } (h::t)$                                                                                                                                                                                                                                                          |
| $\forall(R : \alpha \rightarrow \alpha \rightarrow \text{bool}) (x : \alpha). R^{\wedge} = x \ x$                                                                                                                                                                                                                                                                                 |
| $\forall(v : \alpha). \text{IS\_REDUNDANT\_ROWS\_INFO } v \ ([] : (\alpha \rightarrow \beta \text{ option}) \text{ list}) \ T \ ([] : \text{bool list})$                                                                                                                                                                                                                          |
| $\forall(f : \alpha \rightarrow \beta) (s : (\beta \rightarrow \text{bool}) \rightarrow \text{bool}). \text{PREIMAGE } f \ (\text{BIGUNION } s) = \text{BIGUNION } (\text{IMAGE } (\text{PREIMAGE } f) \ s)$                                                                                                                                                                      |
| $\forall(f : 'z \rightarrow 'z). \text{IDEM } f \Leftrightarrow \forall(x : 'z). f \ (f \ x) = f \ x$                                                                                                                                                                                                                                                                             |
| $\forall(x : \alpha) (s : \alpha \rightarrow \text{bool}). x \notin s \ \text{DELETE } x$                                                                                                                                                                                                                                                                                         |
| $(\text{OPTION\_MAP } (f : \beta \rightarrow \alpha) (x : \beta \text{ option}) = (\text{NONE} : \alpha \text{ option}) \Leftrightarrow x = (\text{NONE} : \beta \text{ option})) \wedge$<br>$((\text{NONE} : \alpha \text{ option}) = \text{OPTION\_MAP } f \ x \Leftrightarrow x = (\text{NONE} : \beta \text{ option}))$                                                       |
| $\forall(x : \alpha) (y : \alpha \text{ list}) (z : \alpha \text{ list}). z \preceq \text{SNOC } x \ y \Leftrightarrow z \preceq y \vee z = \text{SNOC } x \ y$                                                                                                                                                                                                                   |
| $\forall(c : \text{num}) (i : \alpha) (r : \text{num} \rightarrow \text{num} \rightarrow \alpha \rightarrow \text{bool}). \text{ind\_type\$ZCONSTR } c \ i \ r \neq (\text{ind\_type\$ZBOT} : \text{num} \rightarrow \alpha \rightarrow \text{bool})$                                                                                                                             |
| $\forall(f : \alpha \rightarrow \beta \rightarrow \gamma). \exists(fn : \alpha \# \beta \rightarrow \gamma). \forall(x : \alpha) (y : \beta). fn \ (x, y) = f \ x \ y$                                                                                                                                                                                                            |
| $(\text{set } (l : \alpha \text{ list}) = (\emptyset : \alpha \rightarrow \text{bool}) \Leftrightarrow l = ([] : \alpha \text{ list})) \wedge ((\emptyset : \alpha \rightarrow \text{bool}) = \text{set } l \Leftrightarrow l = ([] : \alpha \text{ list}))$                                                                                                                      |
| $\neg((p : \text{bool}) \Rightarrow (q : \text{bool})) \Rightarrow p$                                                                                                                                                                                                                                                                                                             |
| $\forall(f : \alpha \rightarrow \beta) (g : \beta \rightarrow \gamma) (s : \gamma \rightarrow \text{bool}). \text{PREIMAGE } f \ (\text{PREIMAGE } g \ s) = \text{PREIMAGE } (g \circ f) \ s$                                                                                                                                                                                     |
| $\forall(x : \alpha) (n : \text{num}) (ys : \alpha \text{ list}). \text{LENGTH } (\text{LUPDATE } x \ n \ ys) = \text{LENGTH } ys$                                                                                                                                                                                                                                                |
| $(\forall(s : \alpha \rightarrow \text{bool}). \mathbb{U}(:\alpha) \cup s = \mathbb{U}(:\alpha)) \wedge \forall(s : \alpha \rightarrow \text{bool}). s \cup \mathbb{U}(:\alpha) = \mathbb{U}(:\alpha)$                                                                                                                                                                            |
| $\forall(M : \beta \# \gamma) (M' : \beta \# \gamma) (f : \beta \rightarrow \gamma \rightarrow \alpha). M = M' \wedge (\forall(x : \beta) (y : \gamma). M' = (x, y) \Rightarrow f \ x \ y = (f' : \beta \rightarrow \gamma \rightarrow \alpha) \ x \ y) \Rightarrow (\text{pair\_CASE } M \ f : \alpha) = (\text{pair\_CASE } M' \ f' : \alpha)$                                  |
| $\forall(R : \alpha \rightarrow \alpha \rightarrow \text{bool}). (\text{RC } R)^T = \text{RC } R^T$                                                                                                                                                                                                                                                                               |
| $\forall(n : \text{num}). \text{SUC } n \neq (0 : \text{num})$                                                                                                                                                                                                                                                                                                                    |
| $\forall(n : \text{num}) (l : \alpha \text{ list}). n \leq \text{LENGTH } l \Rightarrow \text{BUTLASTN } n \ (\text{LASTN } n \ l) = ([] : \alpha \text{ list})$                                                                                                                                                                                                                  |
| $\forall(s : \alpha \rightarrow \text{bool}) (t : \alpha \rightarrow \text{bool}). s \cup t = (\emptyset : \alpha \rightarrow \text{bool}) \Leftrightarrow s = (\emptyset : \alpha \rightarrow \text{bool}) \wedge t = (\emptyset : \alpha \rightarrow \text{bool})$                                                                                                              |
| $\forall(s : \text{num} \rightarrow \text{bool}). (\exists(n : \text{num}). n \in s) \Leftrightarrow \exists(n : \text{num}). n \in s \wedge \forall(m : \text{num}). m \in s \Rightarrow n \leq m$                                                                                                                                                                               |
| $((\exists(\text{opt} : \alpha \text{ option}). (P : \alpha \text{ option} \rightarrow \text{bool}) \ \text{opt}) \Leftrightarrow P \ (\text{NONE} : \alpha \text{ option})) \vee \exists(x : \alpha). P \ (\text{SOME } x)$                                                                                                                                                      |
| $\forall(P : \alpha \rightarrow \text{bool}) (l1 : \alpha \text{ list}) (l2 : \alpha \text{ list}). \text{EVERY } P \ (l1 ++ l2) \Leftrightarrow \text{EVERY } P \ l1 \wedge \text{EVERY } P \ l2$                                                                                                                                                                                |

|                                                                                                                                                                                                                                                                                                                                                                                                                                                                                                                                                                                                                                                                                                                                                                                                                                                                                                                                                                                          |
|------------------------------------------------------------------------------------------------------------------------------------------------------------------------------------------------------------------------------------------------------------------------------------------------------------------------------------------------------------------------------------------------------------------------------------------------------------------------------------------------------------------------------------------------------------------------------------------------------------------------------------------------------------------------------------------------------------------------------------------------------------------------------------------------------------------------------------------------------------------------------------------------------------------------------------------------------------------------------------------|
| $\forall (v : \alpha) (rs : (\alpha \rightarrow \beta \text{ option}) \text{ list}). (\text{EVERY } (\lambda (r : \alpha \rightarrow \beta \text{ option}). r \ v = (\text{NONE} : \beta \text{ option})) \ rs \Rightarrow F) \Rightarrow \text{PMATCH\_IS\_EXHAUSTIVE } v \ rs$                                                                                                                                                                                                                                                                                                                                                                                                                                                                                                                                                                                                                                                                                                         |
| $(s1 : \alpha \rightarrow \text{bool}) \subseteq (s2 : \alpha \rightarrow \text{bool}) \Rightarrow \text{REL\_RESTRICT } (R : \alpha \rightarrow \alpha \rightarrow \text{bool}) \ s1 \subseteq_r \text{REL\_RESTRICT } R \ s2$                                                                                                                                                                                                                                                                                                                                                                                                                                                                                                                                                                                                                                                                                                                                                          |
| $\text{nsnd } (n : \text{num}) \leq n$                                                                                                                                                                                                                                                                                                                                                                                                                                                                                                                                                                                                                                                                                                                                                                                                                                                                                                                                                   |
| $\forall (R : \alpha \rightarrow \alpha \rightarrow \text{bool}) (x : \alpha) (y : \alpha) (z : \alpha). R \ x \ y \wedge R^{\star} \ y \ z \Rightarrow R^+ \ x \ z$                                                                                                                                                                                                                                                                                                                                                                                                                                                                                                                                                                                                                                                                                                                                                                                                                     |
| $\forall (s : \alpha \rightarrow \text{bool}). \neg (s \subset (\emptyset : \alpha \rightarrow \text{bool}))$                                                                                                                                                                                                                                                                                                                                                                                                                                                                                                                                                                                                                                                                                                                                                                                                                                                                            |
| $\forall (s : \alpha \rightarrow \text{bool}) (t : \alpha \rightarrow \text{bool}). s \ \text{DIFF} \ t \ \text{DIFF} \ t = s \ \text{DIFF} \ t$                                                                                                                                                                                                                                                                                                                                                                                                                                                                                                                                                                                                                                                                                                                                                                                                                                         |
| $\forall (c : \text{bool}) (x : \text{bool}). (\text{if } c \text{ then } x \text{ else } F) \Leftrightarrow c \wedge x$                                                                                                                                                                                                                                                                                                                                                                                                                                                                                                                                                                                                                                                                                                                                                                                                                                                                 |
| $(R : \alpha \rightarrow \beta \rightarrow \text{bool}) \circ_r (\$ : \alpha \rightarrow \alpha \rightarrow \text{bool}) = R$                                                                                                                                                                                                                                                                                                                                                                                                                                                                                                                                                                                                                                                                                                                                                                                                                                                            |
| $\forall (p : \alpha \# \beta) (f : \alpha \rightarrow \gamma) (g : \beta \rightarrow \delta). \text{FST } ((f \ \#\# \ g) \ p) = f \ (\text{FST } p)$                                                                                                                                                                                                                                                                                                                                                                                                                                                                                                                                                                                                                                                                                                                                                                                                                                   |
| $\forall (n : \text{num}). \text{count } n \ \text{DELETE } n = \text{count } n$                                                                                                                                                                                                                                                                                                                                                                                                                                                                                                                                                                                                                                                                                                                                                                                                                                                                                                         |
| $\forall (s : \alpha \rightarrow \text{bool}) (t : \alpha \rightarrow \text{bool}). s \cup (s \ \text{DIFF} \ t) = s$                                                                                                                                                                                                                                                                                                                                                                                                                                                                                                                                                                                                                                                                                                                                                                                                                                                                    |
| $\text{PMATCH\_ROW } (p : \beta \rightarrow \gamma) (g : \beta \rightarrow \text{bool}) (r : \beta \rightarrow \alpha) (v : \gamma) \neq (\text{NONE} : \alpha \text{ option}) \Rightarrow \text{PMATCH } v \ (\text{PMATCH\_ROW } p \ g \ r :: (rs : (\gamma \rightarrow \alpha \text{ option}) \text{ list})) = r \ (@(x : \beta). \text{PMATCH\_ROW\_COND } p \ g \ v \ x)$                                                                                                                                                                                                                                                                                                                                                                                                                                                                                                                                                                                                           |
| $\forall (f : \alpha \rightarrow \beta) (g : \gamma \rightarrow \delta) (x : \alpha) (y : \gamma). (f \ \#\# \ g) (x, y) = (f \ x, g \ y)$                                                                                                                                                                                                                                                                                                                                                                                                                                                                                                                                                                                                                                                                                                                                                                                                                                               |
| $\forall (n : \text{num}). \text{ALL\_DISTINCT } (\text{COUNT\_LIST } n)$                                                                                                                                                                                                                                                                                                                                                                                                                                                                                                                                                                                                                                                                                                                                                                                                                                                                                                                |
| $\text{MAP } (f : \alpha \rightarrow \beta) (l : \alpha \text{ list}) = [(x : \beta)] \Leftrightarrow \exists (x0 : \alpha). l = [x0] \wedge x = f \ x0$                                                                                                                                                                                                                                                                                                                                                                                                                                                                                                                                                                                                                                                                                                                                                                                                                                 |
| $\forall (y : \alpha \rightarrow \beta \rightarrow \text{bool}) (z : \alpha \rightarrow \beta \rightarrow \text{bool}). y = z \Leftrightarrow y \subseteq_r z \wedge z \subseteq_r y$                                                                                                                                                                                                                                                                                                                                                                                                                                                                                                                                                                                                                                                                                                                                                                                                    |
| $\text{LIST\_BIND } ((l1 : \beta \text{ list}) ++ (l2 : \beta \text{ list})) (f : \beta \rightarrow \alpha \text{ list}) = \text{LIST\_BIND } l1 \ f ++ \text{LIST\_BIND } l2 \ f$                                                                                                                                                                                                                                                                                                                                                                                                                                                                                                                                                                                                                                                                                                                                                                                                       |
| $\text{IDEM } (\text{SC} : (\alpha \rightarrow \alpha \rightarrow \text{bool}) \rightarrow \alpha \rightarrow \alpha \rightarrow \text{bool})$                                                                                                                                                                                                                                                                                                                                                                                                                                                                                                                                                                                                                                                                                                                                                                                                                                           |
| $\forall (n : \text{num}) (l2 : \alpha \text{ list}). n \leq \text{LENGTH } l2 \Rightarrow \forall (l1 : \alpha \text{ list}). \text{LASTN } n \ (l1 ++ l2) = \text{LASTN } n \ l2$                                                                                                                                                                                                                                                                                                                                                                                                                                                                                                                                                                                                                                                                                                                                                                                                      |
| $\forall (x : \alpha) (y : \alpha). x \in \{y\} \Leftrightarrow x = y$                                                                                                                                                                                                                                                                                                                                                                                                                                                                                                                                                                                                                                                                                                                                                                                                                                                                                                                   |
| $\forall (t1 : \alpha) (t2 : \alpha). (\text{if } T \text{ then } t1 \text{ else } t2) = t1$                                                                                                                                                                                                                                                                                                                                                                                                                                                                                                                                                                                                                                                                                                                                                                                                                                                                                             |
| $\forall (o1 : \alpha \text{ option}) (o2 : \alpha \text{ option}) (f1 : \alpha \rightarrow \beta \text{ option}) (f2 : \alpha \rightarrow \beta \text{ option}). o1 = o2 \wedge (\forall (x : \alpha). o2 = \text{SOME } x \Rightarrow f1 \ x = f2 \ x) \Rightarrow \text{OPTION\_BIND } o1 \ f1 = \text{OPTION\_BIND } o2 \ f2$                                                                                                                                                                                                                                                                                                                                                                                                                                                                                                                                                                                                                                                        |
| $\forall (L : \text{num list}). \text{SUM } L = \text{SUM\_ACC } L \ (0 : \text{num})$                                                                                                                                                                                                                                                                                                                                                                                                                                                                                                                                                                                                                                                                                                                                                                                                                                                                                                   |
| $\forall (R : \alpha \rightarrow \alpha \rightarrow \text{bool}). \text{reflexive } R^T \Leftrightarrow \text{reflexive } R$                                                                                                                                                                                                                                                                                                                                                                                                                                                                                                                                                                                                                                                                                                                                                                                                                                                             |
| $(\forall (x : \alpha) (y : \beta) (z : \alpha). (\text{if } (P : \text{bool}) \text{ then } (\text{INR } x : \beta + \alpha) \text{ else } (\text{INL } y : \beta + \alpha)) = (\text{INR } z : \beta + \alpha) \Leftrightarrow P \wedge z = x) \wedge (\forall (x : \gamma) (y : \delta) (z : \delta). (\text{if } P \text{ then } (\text{INR } x : \delta + \gamma) \text{ else } (\text{INL } y : \delta + \gamma)) = (\text{INL } z : \delta + \gamma) \Leftrightarrow \neg P \wedge z = y) \wedge (\forall (x : \epsilon) (y : \zeta) (z : \epsilon). (\text{if } P \text{ then } (\text{INL } x : \epsilon + \zeta) \text{ else } (\text{INR } y : \epsilon + \zeta)) = (\text{INL } z : \epsilon + \zeta) \Leftrightarrow P \wedge z = x) \wedge \forall (x : \eta) (y : \theta) (z : \theta). (\text{if } P \text{ then } (\text{INL } x : \eta + \theta) \text{ else } (\text{INR } y : \eta + \theta)) = (\text{INR } z : \eta + \theta) \Leftrightarrow \neg P \wedge z = y$ |
| $\forall (h : \alpha) (l1 : \alpha \text{ list}) (l2 : \alpha \text{ list}). \text{LAST } (l1 ++ h :: l2) = \text{LAST } (h :: l2)$                                                                                                                                                                                                                                                                                                                                                                                                                                                                                                                                                                                                                                                                                                                                                                                                                                                      |
| $\text{trichotomous } (\text{STRORD } (R : \alpha \rightarrow \alpha \rightarrow \text{bool})) \Leftrightarrow \text{trichotomous } R$                                                                                                                                                                                                                                                                                                                                                                                                                                                                                                                                                                                                                                                                                                                                                                                                                                                   |
| $\forall (l : \alpha \text{ list}) (x : \alpha) (y : \alpha) (i : \text{num}). \text{MEM } x \ (\text{LUPDATE } y \ i \ l) \Leftrightarrow i < \text{LENGTH } l \wedge x = y \vee \exists (j : \text{num}). j < \text{LENGTH } l \wedge i \neq j \wedge \text{EL } j \ l = x$                                                                                                                                                                                                                                                                                                                                                                                                                                                                                                                                                                                                                                                                                                            |
| $\text{numeral}\$ii\text{SUC } \text{ZERO} = \text{BIT2 } \text{ZERO} \wedge \text{numeral}\$ii\text{SUC } (\text{BIT1 } (n : \text{num})) = \text{BIT1 } (\text{SUC } n) \wedge \text{numeral}\$ii\text{SUC } (\text{BIT2 } n) = \text{BIT2 } (\text{SUC } n)$                                                                                                                                                                                                                                                                                                                                                                                                                                                                                                                                                                                                                                                                                                                          |
| $\neg((A : \text{bool}) \vee (B : \text{bool})) \Rightarrow F \Leftrightarrow (A \Rightarrow F) \Rightarrow \neg B \Rightarrow F$                                                                                                                                                                                                                                                                                                                                                                                                                                                                                                                                                                                                                                                                                                                                                                                                                                                        |
| $\forall (R : \alpha \rightarrow \alpha \rightarrow \text{bool}) (f : \beta \rightarrow \alpha). \text{total } R \Rightarrow \text{total } (\text{inv\_image } R \ f)$                                                                                                                                                                                                                                                                                                                                                                                                                                                                                                                                                                                                                                                                                                                                                                                                                   |
| $\text{numeral}\$texp\_help \ (n : \text{num}) \ (0 : \text{num}) = (2 : \text{num}) ** (n + (1 : \text{num}))$                                                                                                                                                                                                                                                                                                                                                                                                                                                                                                                                                                                                                                                                                                                                                                                                                                                                          |
| $\text{BIGUNION } (\emptyset : (\alpha \rightarrow \text{bool}) \rightarrow \text{bool}) = (\emptyset : \alpha \rightarrow \text{bool})$                                                                                                                                                                                                                                                                                                                                                                                                                                                                                                                                                                                                                                                                                                                                                                                                                                                 |

|                                                                                                                                                                                                                                                                                                                                                                                 |
|---------------------------------------------------------------------------------------------------------------------------------------------------------------------------------------------------------------------------------------------------------------------------------------------------------------------------------------------------------------------------------|
| $\forall(P : \alpha \rightarrow \beta \rightarrow \text{bool}). (\exists(x : \alpha) (y : \beta). P \ x \ y) \Leftrightarrow \exists((x : \alpha), (y : \beta)). P \ x \ y$                                                                                                                                                                                                     |
| $\forall(s : \alpha \rightarrow \text{bool}) (t : \alpha \rightarrow \text{bool}) (u : \alpha \rightarrow \text{bool}). \text{DISJOINT } s \ t \wedge u \subseteq t \Rightarrow \text{DISJOINT } s \ u$                                                                                                                                                                         |
| $\text{PMATCH\_ROW\_COND\_EX } (i : \alpha) (p : \beta \rightarrow \alpha) (g : \beta \rightarrow \text{bool}) \Leftrightarrow \exists(x : \beta). i = p \ x \wedge g \ x$                                                                                                                                                                                                      |
| $\text{FILTER } (P : \alpha \rightarrow \text{bool}) ([ ] : \alpha \text{ list}) = ([ ] : \alpha \text{ list}) \wedge (\forall(h : \alpha). P \ h \Rightarrow \text{FILTER } P \ (h::([ ] : \alpha \text{ list})) = h::\text{FILTER } P \ [ ]) \wedge \forall(h : \alpha). \neg P \ h \Rightarrow \text{FILTER } P \ (h::([ ] : \alpha \text{ list})) = \text{FILTER } P \ [ ]$ |
| $\forall(c : \text{bool}) (x : \text{bool}). (\text{if } c \text{ then } x \text{ else } T) \Leftrightarrow c \Rightarrow x$                                                                                                                                                                                                                                                    |
| $\forall(s : \alpha \rightarrow \text{bool}) (t : \alpha \rightarrow \text{bool}) (x : \alpha). x \in s \cap t \Leftrightarrow x \in s \wedge x \in t$                                                                                                                                                                                                                          |
| $\text{IDEM } (\text{STRORD} : (\alpha \rightarrow \alpha \rightarrow \text{bool}) \rightarrow \alpha \rightarrow \alpha \rightarrow \text{bool})$                                                                                                                                                                                                                              |
| $(\forall(x : \alpha) (y : \beta). (P : \alpha \rightarrow \beta \rightarrow \text{bool}) \ x \ y \Rightarrow (Q : \alpha \rightarrow \beta \rightarrow \text{bool}) \ x \ y) \Rightarrow \text{OPTREL } P \ (x : \alpha \text{ option}) \ (y : \beta \text{ option}) \Rightarrow \text{OPTREL } Q \ x \ y$                                                                     |
| $(\forall(x : \text{num}). \text{pair\_to\_num } (\text{num\_to\_pair } x) = x) \wedge \forall(x : \text{num}) (y : \text{num}). \text{num\_to\_pair } (\text{pair\_to\_num } (x, y)) = (x, y)$                                                                                                                                                                                 |
| $\forall(n : \text{num}). (0 : \text{num}) < n \Leftrightarrow \text{count } n \neq (\emptyset : \text{num} \rightarrow \text{bool})$                                                                                                                                                                                                                                           |
| $\forall(l : \alpha \text{ list}) (n : \text{num}). n < \text{LENGTH } l \Rightarrow \text{DROP } n \ l = \text{EL } n \ l::\text{DROP } (n + (1 : \text{num})) \ l$                                                                                                                                                                                                            |
| $(2 : \text{num}) * \text{tri } (n : \text{num}) = n * (n + (1 : \text{num}))$                                                                                                                                                                                                                                                                                                  |
| $(x : \alpha) \in \text{BIGINTER } (B : (\alpha \rightarrow \text{bool}) \rightarrow \text{bool}) \Leftrightarrow \forall(P : \alpha \rightarrow \text{bool}). P \in B \Rightarrow x \in P$                                                                                                                                                                                     |
| $\forall(x : \alpha) (s : \alpha \rightarrow \text{bool}). s \ \text{DELETE } x \subseteq s$                                                                                                                                                                                                                                                                                    |
| $\forall(s : \alpha \rightarrow \text{bool}). \text{FINITE } s \Rightarrow \forall(x : \alpha). x \in s \Leftrightarrow \text{MEM } x \ (\text{SET\_TO\_LIST } s)$                                                                                                                                                                                                              |
| $\forall(s1 : \alpha \rightarrow \text{bool}) (s2 : \alpha \rightarrow \text{bool}) (x : \alpha). s1 \subseteq s2 \Rightarrow s1 \ \text{DELETE } x \subseteq s2 \ \text{DELETE } x$                                                                                                                                                                                            |
| $\forall(s : \alpha \rightarrow \text{bool}). s = (\emptyset : \alpha \rightarrow \text{bool}) \vee \exists(x : \alpha) (t : \alpha \rightarrow \text{bool}). s = x \ \text{INSERT } t \wedge x \notin t$                                                                                                                                                                       |
| $\forall(s1 : \alpha \rightarrow \text{bool}) (s2 : \alpha \rightarrow \text{bool}). s1 \subseteq s2 \Rightarrow \text{POW } s1 \subseteq \text{POW } s2$                                                                                                                                                                                                                       |
| $\text{MAX\_SET } (\emptyset : \text{num} \rightarrow \text{bool}) = (0 : \text{num}) \wedge \text{MAX\_SET } \{(e : \text{num})\} = e$                                                                                                                                                                                                                                         |
| $\text{OPTION\_MAP } (f : \alpha \rightarrow \beta) (x : \alpha \text{ option}) = (\text{option\_CASE } x \ (\text{NONE} : \beta \text{ option}) \ ((\text{SOME} : \beta \rightarrow \beta \text{ option}) \circ f) : \beta \text{ option})$                                                                                                                                    |
| $\forall(R : \alpha \rightarrow \alpha \rightarrow \text{bool}) (x : \alpha) (y : \alpha). R^* \ x \ y \Rightarrow \text{RC } R \ x \ y \vee R^+ \ x \ y$                                                                                                                                                                                                                       |
| $\forall(R : \alpha \rightarrow \alpha \rightarrow \text{bool}). (\forall(x : \alpha). R^* \ x \ x) \wedge \forall(x : \alpha) (y : \alpha) (z : \alpha). R \ x \ y \wedge R^* \ y \ z \Rightarrow R^* \ x \ z$                                                                                                                                                                 |
| $\forall(x : \alpha) (y : \beta). (\text{INR } y : \alpha + \beta) \neq (\text{INL } x : \alpha + \beta)$                                                                                                                                                                                                                                                                       |
| $\forall(x : \alpha) (s : \alpha \rightarrow \text{bool}) (t : \alpha \rightarrow \text{bool}). (x \ \text{INSERT } s) \cup t = x \ \text{INSERT } s \cup t$                                                                                                                                                                                                                    |
| $\forall(n : \text{num}) (l : \alpha \text{ list}). n < \text{LENGTH } l \Rightarrow \text{DROP } n \ l = \text{EL } n \ l::\text{DROP } (\text{SUC } n) \ l$                                                                                                                                                                                                                   |
| $\forall(s : \alpha \rightarrow \text{bool}). \text{FINITE } s \Leftrightarrow s \ \text{HAS\_SIZE } \text{CARD } s$                                                                                                                                                                                                                                                            |
| $\forall(n : \text{num}) (l : \alpha \text{ list}). n \leq \text{LENGTH } l \Rightarrow \text{LENGTH } (\text{LASTN } n \ l) = n$                                                                                                                                                                                                                                               |
| $\forall(\text{opt} : \alpha \text{ option}). \text{IS\_SOME } \text{opt} \Leftrightarrow \exists(x : \alpha). \text{opt} = \text{SOME } x$                                                                                                                                                                                                                                     |
| $\forall(x : \alpha) (\text{sos} : (\alpha \rightarrow \text{bool}) \rightarrow \text{bool}). x \in \text{BIGUNION } \text{sos} \Leftrightarrow \exists(s : \alpha \rightarrow \text{bool}). x \in s \wedge s \in \text{sos}$                                                                                                                                                   |
| $\forall(P : \alpha \rightarrow \text{bool}) (Q : \alpha \rightarrow \text{bool}). \{x \mid P \ x \vee Q \ x\} = \{x \mid P \ x\} \cup \{x \mid Q \ x\}$                                                                                                                                                                                                                        |
| $([ ] : \alpha \text{ list}) \in (s : \alpha \text{ list} \rightarrow \text{bool}) \Rightarrow \text{longest\_prefix } s = ([ ] : \alpha \text{ list})$                                                                                                                                                                                                                         |
| $\forall(R : \alpha \rightarrow \alpha \rightarrow \text{bool}). \text{SC } (\text{SC } R) = \text{SC } R$                                                                                                                                                                                                                                                                      |
| $\forall(a : \alpha \rightarrow \text{bool}) (b : \beta \rightarrow \text{bool}) (c : \beta \rightarrow \text{bool}). \text{FUNSET } a \ (b \cap c) = \text{FUNSET } a \ b \cap \text{FUNSET } a \ c$                                                                                                                                                                           |
| $\text{INFINITE } \mathbb{U} : \alpha \Leftrightarrow \forall(s : \alpha \rightarrow \text{bool}). \text{FINITE } s \Rightarrow \exists(x : \alpha). x \notin s$                                                                                                                                                                                                                |
| $\forall(l : \alpha \text{ list list}). \text{LENGTH } (\text{FLAT } l) = \text{SUM } (\text{MAP } (\text{LENGTH} : \alpha \text{ list} \rightarrow \text{num}) \ l)$                                                                                                                                                                                                           |
| $\forall(n : \text{num}) (m : \text{num}) (l : \alpha \text{ list}). m \leq n \Rightarrow \text{TAKE } m \ l ++ \text{TAKE } (n - m) \ (\text{DROP } m \ l) = \text{TAKE } n \ l$                                                                                                                                                                                               |
| $\forall(x : \alpha) (l : \alpha \text{ list}). \neg \text{NULL } (\text{SNOC } x \ l)$                                                                                                                                                                                                                                                                                         |
| $\text{INJ } (f : \alpha \rightarrow \beta) (s : \alpha \rightarrow \text{bool}) (t : \beta \rightarrow \text{bool}) \Rightarrow \text{FINITE } s \Rightarrow \text{CARD } (\text{IMAGE } f \ s) = \text{CARD } s$                                                                                                                                                              |
| $\forall(P : \alpha \text{ list} \rightarrow \text{bool}). P \ ([ ] : \alpha \text{ list}) \wedge (\forall(l : \alpha \text{ list}). P \ l \Rightarrow \forall(a : \alpha). P \ (a::l)) \Rightarrow \forall(l : \alpha \text{ list}). P \ l$                                                                                                                                    |

|                                                                                                                                                                                                                                                                                                                                                                                                                                                       |
|-------------------------------------------------------------------------------------------------------------------------------------------------------------------------------------------------------------------------------------------------------------------------------------------------------------------------------------------------------------------------------------------------------------------------------------------------------|
| $\forall (s : \alpha \rightarrow \text{bool}) (t : \alpha \rightarrow \text{bool}). s \text{ DIFF } t \subseteq s$                                                                                                                                                                                                                                                                                                                                    |
| $\forall (l : \alpha \text{ list}). \text{BUTLASTN } (\text{LENGTH } l) l = ([] : \alpha \text{ list})$                                                                                                                                                                                                                                                                                                                                               |
| $\forall (P : \alpha \rightarrow \beta \rightarrow \text{bool}) (l1 : \alpha \text{ list}) (l2 : \beta \text{ list}). \text{LIST\_REL } P l1 l2 \Rightarrow \text{LENGTH } l1 = \text{LENGTH } l2$                                                                                                                                                                                                                                                    |
| $\forall (f : \alpha \rightarrow \beta) (s : \beta \rightarrow \text{bool}). \text{PREIMAGE } f (\text{COMPL } s) = \text{COMPL } (\text{PREIMAGE } f s)$                                                                                                                                                                                                                                                                                             |
| $\text{symmetric } (R : \alpha \rightarrow \alpha \rightarrow \text{bool})^{\wedge} =$                                                                                                                                                                                                                                                                                                                                                                |
| $\forall (P : \alpha \rightarrow \text{bool}) (l : \alpha \text{ list}) (m : \text{num}). \text{EVERY } P l \Rightarrow \text{EVERY } P (\text{DROP } m l)$                                                                                                                                                                                                                                                                                           |
| $\forall (s : \alpha \rightarrow \text{bool}) (t : \beta \rightarrow \text{bool}). (\exists (f : \alpha \rightarrow \beta). \text{BIJ } f s t) \Leftrightarrow \exists (g : \beta \rightarrow \alpha). \text{BIJ } g t s$                                                                                                                                                                                                                             |
| $\forall (f : \alpha \rightarrow \beta) (s : \alpha \rightarrow \text{bool}) (t : \beta \rightarrow \text{bool}). \text{BIJ } f s t \Rightarrow t = \text{IMAGE } f s$                                                                                                                                                                                                                                                                                |
| $\forall (l1 : \alpha \text{ list}) (x : \alpha) (l2 : \alpha \text{ list}). l1 ++ \text{SNOC } x l2 = \text{SNOC } x (l1 ++ l2)$                                                                                                                                                                                                                                                                                                                     |
| $\text{CURRY } (f : \alpha \# \beta \rightarrow \gamma) = \text{CURRY } (g : \alpha \# \beta \rightarrow \gamma) \Leftrightarrow f = g$                                                                                                                                                                                                                                                                                                               |
| $\forall (n : \text{num}) (l : \alpha \text{ list}). n \leq \text{LENGTH } l \Rightarrow \text{TAKE } n l = \text{BUTLASTN } (\text{LENGTH } l - n) l$                                                                                                                                                                                                                                                                                                |
| $\forall (x : \alpha). \mathbb{U}(\alpha) x$                                                                                                                                                                                                                                                                                                                                                                                                          |
| $\forall (m : \text{num}) (n : \text{num}). \text{TAKE } n (\text{TAKE } m (l : \alpha \text{ list})) = \text{TAKE } (\text{MIN } n m) l$                                                                                                                                                                                                                                                                                                             |
| $\forall (f : \alpha \rightarrow \beta) (s : \alpha \rightarrow \text{bool}) (t : \alpha \rightarrow \text{bool}). \text{IMAGE } f (s \cup t) = \text{IMAGE } f s \cup \text{IMAGE } f t$                                                                                                                                                                                                                                                             |
| $(\forall (x : \alpha) (y : \alpha). (R : \alpha \rightarrow \alpha \rightarrow \text{bool}) x y \Rightarrow (f : \alpha \rightarrow \beta) x = f y) \Rightarrow \forall (x : \alpha) (y : \alpha). R^+ x y \Rightarrow f x = f y$                                                                                                                                                                                                                    |
| $\forall (f : \alpha \rightarrow \beta) (s : \beta \rightarrow \text{bool}) (t : \beta \rightarrow \text{bool}). \text{PREIMAGE } f (s \text{ DIFF } t) = \text{PREIMAGE } f s \text{ DIFF } \text{PREIMAGE } f t$                                                                                                                                                                                                                                    |
| $\forall (A : \alpha \rightarrow \text{bool}) (B : \alpha \rightarrow \text{bool}) (x : \alpha). A \cup B \text{ DELETE } x = A \text{ DELETE } x \cup (B \text{ DELETE } x)$                                                                                                                                                                                                                                                                         |
| $(\forall (l : \alpha \text{ list}). \text{BUTLASTN } (0 : \text{num}) l = l) \wedge \forall (n : \text{num}) (x : \beta) (l : \beta \text{ list}). \text{BUTLASTN } (\text{SUC } n) (\text{SNOC } x l) = \text{BUTLASTN } n l$                                                                                                                                                                                                                       |
| $\forall (R : \alpha \rightarrow \alpha \rightarrow \text{bool}) (x : \alpha) (y : \alpha). R x y \Rightarrow R^{\star} x y$                                                                                                                                                                                                                                                                                                                          |
| $\forall (n : \text{num}) (l : \alpha \text{ list}). n \leq \text{LENGTH } l \Rightarrow \text{TAKE } n (\text{REVERSE } l) = \text{REVERSE } (\text{LASTN } n l)$                                                                                                                                                                                                                                                                                    |
| $\forall (xs : \alpha \text{ option list}) (n : \text{num}) (f : \alpha \rightarrow \beta) (h : \alpha). \text{LUPDATE } (\text{SOME } (f h)) n (\text{MAP } (\text{OPTION\_MAP } f) xs) = \text{MAP } (\text{OPTION\_MAP } f) (\text{LUPDATE } (\text{SOME } h) n xs)$                                                                                                                                                                               |
| $\forall (x : \alpha) (s : \alpha \rightarrow \text{bool}). x \in s \Rightarrow x \text{ INSERT } s \text{ DELETE } x = s$                                                                                                                                                                                                                                                                                                                            |
| $\forall (R : \alpha \rightarrow \alpha \rightarrow \text{bool}). \text{reflexive } R \Rightarrow \text{RC } R = R$                                                                                                                                                                                                                                                                                                                                   |
| $(\text{OPTION\_BIND } (p : \alpha \text{ option}) (f : \alpha \rightarrow \beta \text{ option}) = (\text{NONE} : \beta \text{ option}) \Leftrightarrow p = (\text{NONE} : \alpha \text{ option}) \vee \exists (x : \alpha). p = \text{SOME } x \wedge f x = (\text{NONE} : \beta \text{ option})) \wedge (\text{OPTION\_BIND } p f = \text{SOME } (y : \beta) \Leftrightarrow \exists (x : \alpha). p = \text{SOME } x \wedge f x = \text{SOME } y)$ |
| $\forall (l1 : \alpha \text{ list}) (l2 : \alpha \text{ list}). \text{set } l1 \cup \text{set } l2 = \text{set } (l1 ++ l2)$                                                                                                                                                                                                                                                                                                                          |
| $\forall (R : \alpha \rightarrow \alpha \rightarrow \text{bool}) (x : \alpha) (y : \alpha). R^{\star} x y \Leftrightarrow \exists (u : \alpha). R^{\star} x u \wedge R^{\star} u y$                                                                                                                                                                                                                                                                   |
| $\text{MIN } (0 : \text{num}) (x : \text{num}) = (0 : \text{num}) \wedge \text{MIN } x (0 : \text{num}) = (0 : \text{num}) \wedge \text{MIN } (\text{NUMERAL } x) (\text{NUMERAL } (y : \text{num})) = \text{NUMERAL } (\text{if } x < y \text{ then } x \text{ else } y)$                                                                                                                                                                            |
| $\forall (c : \text{bool}) (x : \text{bool}) (x' : \text{bool}) (y : \text{bool}) (y' : \text{bool}). (x' \Rightarrow x) \wedge (y' \Rightarrow y) \Rightarrow (\text{if } c \text{ then } x' \text{ else } y') \Rightarrow \text{if } c \text{ then } x \text{ else } y$                                                                                                                                                                             |
| $\forall (P : \alpha \rightarrow \text{bool}) (s : \alpha \rightarrow \text{bool}) (t : \alpha \rightarrow \text{bool}). (\forall (x : \alpha). x \in s \cup t \Rightarrow P x) \Leftrightarrow (\forall (x : \alpha). x \in s \Rightarrow P x) \wedge \forall (x : \alpha). x \in t \Rightarrow P x$                                                                                                                                                 |
| $\text{PMATCH\_ROW } (p : \beta \rightarrow \gamma) (g : \beta \rightarrow \text{bool}) (r : \beta \rightarrow \alpha) (i : \gamma) = (\text{NONE} : \alpha \text{ option}) \Leftrightarrow \forall (x : \beta). \neg \text{PMATCH\_ROW\_COND } p g i x$                                                                                                                                                                                              |
| $\forall (f1 : \alpha \rightarrow \text{bool}) (f2 : \beta \rightarrow \alpha) (l : \beta \text{ list}). \text{FILTER } f1 (\text{MAP } f2 l) = \text{MAP } f2 (\text{FILTER } (f1 \circ f2) l)$                                                                                                                                                                                                                                                      |
| $\forall (s : \alpha \rightarrow \text{bool}) (t : \alpha \rightarrow \text{bool}) (u : \alpha \rightarrow \text{bool}). s \subseteq t \wedge t \subseteq u \Rightarrow s \subseteq u$                                                                                                                                                                                                                                                                |
| $(\forall (R : \alpha \rightarrow \beta \rightarrow \text{bool}) (x : \alpha) (y : \beta \text{ option}). \text{OPTREL } R (\text{SOME } x) y \Leftrightarrow \exists (z : \beta). y = \text{SOME } z \wedge R x z) \wedge \forall (R : \gamma \rightarrow \delta \rightarrow \text{bool}) (x : \gamma \text{ option}) (y : \delta). \text{OPTREL } R x (\text{SOME } y) \Leftrightarrow \exists (z : \gamma). x = \text{SOME } z \wedge R z y$       |

|                                                                                                                                                                                                                                                                                                                                                                                                                                                                                                              |
|--------------------------------------------------------------------------------------------------------------------------------------------------------------------------------------------------------------------------------------------------------------------------------------------------------------------------------------------------------------------------------------------------------------------------------------------------------------------------------------------------------------|
| $\forall(m : \text{num}) (n : \text{num}). m < \text{SUC } n \Rightarrow m = n \vee m < n$                                                                                                                                                                                                                                                                                                                                                                                                                   |
| $\text{tri } (n : \text{num}) = n * (n + (1 : \text{num})) \text{ DIV } (2 : \text{num})$                                                                                                                                                                                                                                                                                                                                                                                                                    |
| $\forall(f : \alpha \rightarrow \beta \rightarrow \beta) (e : \beta) (x : \alpha) (l : \alpha \text{ list}). \text{FOLDR } f \ e \ (\text{SNOC } x \ l) = \text{FOLDR } f \ (f \ x \ e) \ l$                                                                                                                                                                                                                                                                                                                 |
| $\forall(l1 : \alpha \text{ list}) (l2 : \beta \text{ list}). \text{LENGTH } l1 = \text{LENGTH } l2 \Rightarrow (\text{ZIP } (l1, l2) = ([] : (\alpha \# \beta) \text{ list}) \Leftrightarrow l1 = ([] : \alpha \text{ list}) \wedge l2 = ([] : \beta \text{ list}))$                                                                                                                                                                                                                                        |
| $\{x \mid x \in (y : \alpha \rightarrow \text{bool})\} = y$                                                                                                                                                                                                                                                                                                                                                                                                                                                  |
| $\forall(n : \text{num}). n \neq (0 : \text{num}) \Rightarrow \text{COUNT\_LIST } n = (0 : \text{num}) :: \text{MAP } \text{SUC } (\text{COUNT\_LIST } (n - (1 : \text{num})))$                                                                                                                                                                                                                                                                                                                              |
| $\forall(R : \alpha \rightarrow \alpha \rightarrow \text{bool}) (x : \alpha) (y : \alpha). \text{WF } R \Rightarrow R \ x \ y \Rightarrow x \neq y$                                                                                                                                                                                                                                                                                                                                                          |
| $\forall(s : \alpha \rightarrow \text{bool}) (t : \alpha \rightarrow \text{bool}) (u : \alpha \rightarrow \text{bool}). s \cup (t \cup u) = s \cup t \cup u$                                                                                                                                                                                                                                                                                                                                                 |
| $\forall(m : \text{num}) (n : \text{num}). m < \text{SUC } n \Leftrightarrow m = n \vee m < n$                                                                                                                                                                                                                                                                                                                                                                                                               |
| $\forall(s : \alpha \rightarrow \text{bool}) (t : \alpha \rightarrow \text{bool}). s \subset t \Leftrightarrow \exists(x : \alpha). x \notin s \wedge x \text{ INSERT } s \subseteq t$                                                                                                                                                                                                                                                                                                                       |
| $\forall(x : \alpha) (s : \alpha \rightarrow \text{bool}) (t : \alpha \rightarrow \text{bool}). s \subseteq t \text{ DELETE } x \Leftrightarrow x \notin s \wedge s \subseteq t$                                                                                                                                                                                                                                                                                                                             |
| $(\forall(l : \alpha \text{ list}). \text{DROP } (0 : \text{num}) \ l = l) \wedge \forall(n : \text{num}) (x : \alpha) (l : \alpha \text{ list}). \text{DROP } (\text{SUC } n) (x :: l) = \text{DROP } n \ l$                                                                                                                                                                                                                                                                                                |
| $\forall(n : \text{num}) (f : \text{num} \rightarrow \alpha). (0 : \text{num}) < n \Rightarrow \text{HD } (\text{GENLIST } f \ n) = f \ (0 : \text{num})$                                                                                                                                                                                                                                                                                                                                                    |
| $\forall(x : \alpha \text{ list}) (y : \beta \text{ list}). \text{LIST\_REL } (R : \alpha \rightarrow \beta \rightarrow \text{bool}) \ x \ y \Rightarrow \text{LENGTH } x = \text{LENGTH } y$                                                                                                                                                                                                                                                                                                                |
| $(l1 : \alpha \text{ list}) ++ (l2 : \alpha \text{ list}) = [(e : \alpha)] \Leftrightarrow l1 = [e] \wedge l2 = ([] : \alpha \text{ list}) \vee l1 = ([] : \alpha \text{ list}) \wedge l2 = [e]$                                                                                                                                                                                                                                                                                                             |
| $\forall(b : \alpha \rightarrow \beta) (s : \alpha \rightarrow \text{bool}) (t : \beta \rightarrow \text{bool}) (x : \alpha) (y : \beta). \text{INJ } b \ s \ t \wedge x \notin s \wedge y \notin t \Rightarrow \text{INJ } b(\lambda x \mapsto y)(x \text{ INSERT } s) (y \text{ INSERT } t)$                                                                                                                                                                                                               |
| $\forall(n : \text{num}) (x : \alpha) (l : \alpha \text{ list}). \text{ELL } (\text{SUC } n) (\text{SNOC } x \ l) = \text{ELL } n \ l$                                                                                                                                                                                                                                                                                                                                                                       |
| $\forall(n : \text{num}) (m : \text{num}) (l : \alpha \text{ list}). n + m \leq \text{LENGTH } l \Rightarrow \forall(x : \alpha). \text{SEG } n \ m \ (\text{SNOC } x \ l) = \text{SEG } n \ m \ l$                                                                                                                                                                                                                                                                                                          |
| $\forall(s : \alpha \rightarrow \text{bool}) (f : \alpha \rightarrow \beta). (\text{IMAGE } f \ s = (\emptyset : \beta \rightarrow \text{bool}) \Leftrightarrow s = (\emptyset : \alpha \rightarrow \text{bool})) \wedge ((\emptyset : \beta \rightarrow \text{bool}) = \text{IMAGE } f \ s \Leftrightarrow s = (\emptyset : \alpha \rightarrow \text{bool}))$                                                                                                                                               |
| $\forall(L : (\alpha \# \beta) \text{ list}). \text{UNZIP } L = (\text{MAP } (\text{FST} : \alpha \# \beta \rightarrow \alpha) \ L, \text{MAP } (\text{SND} : \alpha \# \beta \rightarrow \beta) \ L)$                                                                                                                                                                                                                                                                                                       |
| $\forall(p : \alpha \# \beta) (p' : \alpha \# \beta) (P : \alpha \rightarrow \text{bool}) (P' : \alpha \rightarrow \text{bool}) (Q : \beta \rightarrow \text{bool}) (Q' : \beta \rightarrow \text{bool}). p = p' \wedge (\forall(x : \alpha) (y : \beta). p' = (x, y) \Rightarrow (P \ x \Leftrightarrow P' \ x)) \wedge (\forall(x : \alpha) (y : \beta). p' = (x, y) \Rightarrow (Q \ y \Leftrightarrow Q' \ y)) \Rightarrow (\text{PROD\_ALL } P \ Q \ p \Leftrightarrow \text{PROD\_ALL } P' \ Q' \ p')$ |
| $\text{SET\_TO\_LIST } (\emptyset : \alpha \rightarrow \text{bool}) = ([] : \alpha \text{ list})$                                                                                                                                                                                                                                                                                                                                                                                                            |
| $\forall(f : \alpha \rightarrow \beta \rightarrow \text{bool}) (s : \alpha \rightarrow \text{bool}) (t : \gamma \rightarrow \text{bool}). \text{BIGUNION } (\text{IMAGE } f \ s) \times t = \text{BIGUNION } (\text{IMAGE } (\lambda(n : \alpha). f \ n \times t) \ s)$                                                                                                                                                                                                                                      |
| $\forall(s : \alpha \rightarrow \text{bool}) (t : \alpha \rightarrow \text{bool}) (u : \alpha \rightarrow \text{bool}) (v : \alpha \rightarrow \text{bool}). \text{DISJOINT } s \ t \wedge u \subseteq s \wedge v \subseteq t \Rightarrow \text{DISJOINT } u \ v$                                                                                                                                                                                                                                            |
| $\text{FST } (p : \alpha \# \beta) = (x : \alpha) \Leftrightarrow \exists(y : \beta). p = (x, y)$                                                                                                                                                                                                                                                                                                                                                                                                            |
| $\forall(x : \alpha \text{ list}) (y : \alpha \text{ list}). x \leqslant y \Rightarrow \text{LENGTH } x \leq \text{LENGTH } y$                                                                                                                                                                                                                                                                                                                                                                               |
| $\forall(x : \alpha). \text{one\_CASE } () \ x = x$                                                                                                                                                                                                                                                                                                                                                                                                                                                          |
| $\forall(A : \alpha \rightarrow \text{bool}) (B : \beta \rightarrow \text{bool}) (C : \alpha \rightarrow \text{bool}) (D : \beta \rightarrow \text{bool}). A \times B \cap (C \times D) = A \cap C \times (B \cap D)$                                                                                                                                                                                                                                                                                        |
| $\forall(x : \alpha) (y : \alpha). \{y\} \ x \Leftrightarrow x = y$                                                                                                                                                                                                                                                                                                                                                                                                                                          |
| $\text{WeakOrder } (\$ \text{RSUBSET} : (\alpha \rightarrow \beta \rightarrow \text{bool}) \rightarrow (\alpha \rightarrow \beta \rightarrow \text{bool}) \rightarrow \text{bool})$                                                                                                                                                                                                                                                                                                                          |
| $\text{INFINITE } \mathbb{U} : (\alpha) \Leftrightarrow \exists(f : \alpha \rightarrow \alpha). (\forall(x : \alpha) (y : \alpha). f \ x = f \ y \Rightarrow x = y) \wedge \exists(y : \alpha). \forall(x : \alpha). f \ x \neq y$                                                                                                                                                                                                                                                                           |
| $\forall(R : \alpha \rightarrow \alpha \rightarrow \text{bool}) (x : \alpha) (z : \alpha). R^+ \ x \ z \Rightarrow R \ x \ z \vee \exists(y : \alpha). R^+ \ x \ y \wedge R \ y \ z$                                                                                                                                                                                                                                                                                                                         |
| $\forall(R : \alpha \rightarrow \alpha \rightarrow \text{bool}) (\text{RTC}' : \alpha \rightarrow \alpha \rightarrow \text{bool}). (\forall(x : \alpha). \text{RTC}' \ x \ x) \wedge (\forall(x : \alpha) (y : \alpha) (z : \alpha). R \ x \ y \wedge \text{RTC}' \ y \ z \Rightarrow \text{RTC}' \ x \ z) \Rightarrow \forall(a0 : \alpha) (a1 : \alpha). R^\diamond a0 \ a1 \Rightarrow \text{RTC}' \ a0 \ a1$                                                                                             |
| $\forall(x : \alpha) (s : \alpha \rightarrow \text{bool}). x \text{ INSERT } s \neq (\emptyset : \alpha \rightarrow \text{bool})$                                                                                                                                                                                                                                                                                                                                                                            |

|                                                                                                                                                                                                                                                                                                                                                                                                                                                                                            |  |
|--------------------------------------------------------------------------------------------------------------------------------------------------------------------------------------------------------------------------------------------------------------------------------------------------------------------------------------------------------------------------------------------------------------------------------------------------------------------------------------------|--|
| $\forall(f : \alpha \rightarrow \beta). \text{PREIMAGE } f \, \mathbb{U}(\beta) = \mathbb{U}(\alpha)$                                                                                                                                                                                                                                                                                                                                                                                      |  |
| $\forall(P : \alpha \rightarrow \text{bool}) (l : \alpha \text{ list}). \text{EXISTS } P \, l \Leftrightarrow \text{FOLDER } (\lambda(x : \alpha) (l' : \text{bool}). P \, x \vee l') \, F \, l$                                                                                                                                                                                                                                                                                           |  |
| $\text{IDEM } (\text{RC} : (\alpha \rightarrow \alpha \rightarrow \text{bool}) \rightarrow \alpha \rightarrow \alpha \rightarrow \text{bool})$                                                                                                                                                                                                                                                                                                                                             |  |
| $\forall(X : \alpha \rightarrow \text{bool}) (P : (\alpha \rightarrow \text{bool}) \rightarrow \text{bool}). \text{BIGUNION } P \subseteq X \Leftrightarrow \forall(Y : \alpha \rightarrow \text{bool}). Y \in P \Rightarrow Y \subseteq X$                                                                                                                                                                                                                                                |  |
| $\forall(f : \alpha \rightarrow \beta) (x : \alpha). \text{IMAGE } f \, \{x\} = \{f \, x\}$                                                                                                                                                                                                                                                                                                                                                                                                |  |
| $((\mathbb{U}_r : \alpha \rightarrow \beta \rightarrow \text{bool}) \subseteq_r (R : \alpha \rightarrow \beta \rightarrow \text{bool}) \Leftrightarrow R = (\mathbb{U}_r : \alpha \rightarrow \beta \rightarrow \text{bool})) \wedge R \subseteq_r (\mathbb{U}_r : \alpha \rightarrow \beta \rightarrow \text{bool})$                                                                                                                                                                      |  |
| $\forall(x : \alpha + \beta). \text{ISL } x \vee \text{ISR } x$                                                                                                                                                                                                                                                                                                                                                                                                                            |  |
| $\text{transitive } (R : \alpha \rightarrow \alpha \rightarrow \text{bool}) \Leftrightarrow R \circ_r R \subseteq_r R$                                                                                                                                                                                                                                                                                                                                                                     |  |
| $\neg F \Leftrightarrow T$                                                                                                                                                                                                                                                                                                                                                                                                                                                                 |  |
| $\neg((p : \text{bool}) \vee (q : \text{bool})) \Rightarrow \neg p$                                                                                                                                                                                                                                                                                                                                                                                                                        |  |
| $\text{WF } \$<$                                                                                                                                                                                                                                                                                                                                                                                                                                                                           |  |
| $\forall(f : \alpha \rightarrow \beta) (g : \beta \rightarrow \gamma) (s : \alpha \rightarrow \text{bool}) (t : \beta \rightarrow \text{bool}) (u : \gamma \rightarrow \text{bool}). \text{BIJ } f \, s \, t \wedge \text{BIJ } g \, t \, u \Rightarrow \text{BIJ } (g \circ f) \, s \, u$                                                                                                                                                                                                 |  |
| $\forall(s : \alpha \rightarrow \text{bool}) (t : \alpha \rightarrow \text{bool}). \text{INFINITE } s \wedge \text{FINITE } t \Rightarrow s \, \text{DIFF } t \neq (\emptyset : \alpha \rightarrow \text{bool})$                                                                                                                                                                                                                                                                           |  |
| $\forall(f : \alpha \rightarrow \beta) (v : \gamma) (p : \beta \rightarrow \gamma) (g : \beta \rightarrow \text{bool}) (p' : \alpha \rightarrow \gamma) (g' : \alpha \rightarrow \text{bool}).$<br>$\neg \text{PMATCH\_ROW\_COND\_EX } v \, p \, g \Rightarrow (\forall(x : \alpha). p' \, x = p \, (f \, x)) \Rightarrow (\text{PMATCH\_ROW\_COND\_EX } v \, p' \, g' \Leftrightarrow \text{PMATCH\_ROW\_COND\_EX } v \, p' \, (\lambda(x : \alpha). g' \, x \wedge \neg g \, (f \, x)))$ |  |
| $\forall(f : \alpha \rightarrow \beta) (l : \alpha \text{ list list}). \text{MAP } f \, (\text{FLAT } l) = \text{FLAT } (\text{MAP } (\text{MAP } f) \, l)$                                                                                                                                                                                                                                                                                                                                |  |
| $\forall(m : \text{num}) (n : \text{num}). \text{SUC } m = \text{SUC } n \Rightarrow m = n$                                                                                                                                                                                                                                                                                                                                                                                                |  |
| $\forall(s : \alpha \rightarrow \text{bool}) (x : \alpha). x \notin s \Rightarrow s \, \text{DELETE } x = s$                                                                                                                                                                                                                                                                                                                                                                               |  |
| $\forall(l1 : \alpha \text{ list}) (x : \alpha) (l2 : \alpha \text{ list}). \text{SNOC } x \, l1 \, ++ \, l2 = l1 \, ++ \, x :: l2$                                                                                                                                                                                                                                                                                                                                                        |  |
| $\text{pairwise } (R : \alpha \rightarrow \alpha \rightarrow \text{bool}) ((s1 : \alpha \rightarrow \text{bool}) \cup (s2 : \alpha \rightarrow \text{bool})) \Leftrightarrow \text{pairwise } R \, s1 \wedge \text{pairwise } R \, s2 \wedge \forall(x : \alpha) (y : \alpha). x \in s1 \wedge y \in s2 \Rightarrow R \, x \, y \wedge R \, y \, x$                                                                                                                                        |  |
| $\forall(s : \alpha \rightarrow \text{bool}) (t : \alpha \rightarrow \text{bool}). s \subseteq t \Leftrightarrow s \cap t = s$                                                                                                                                                                                                                                                                                                                                                             |  |
| $\forall(l : \alpha \text{ list}). \text{REVERSE } l = \text{FOLDER } (\text{SNOC } : \alpha \rightarrow \alpha \text{ list} \rightarrow \alpha \text{ list}) \, ([] : \alpha \text{ list}) \, l$                                                                                                                                                                                                                                                                                          |  |
| $\forall(x : \alpha \# \beta). \exists(q : \alpha) (r : \beta). x = (q, r)$                                                                                                                                                                                                                                                                                                                                                                                                                |  |
| $\forall(P : \alpha \rightarrow \text{bool}) (Q : \alpha \rightarrow \text{bool}). \text{BIGINTER } \{P; Q\} = P \cap Q$                                                                                                                                                                                                                                                                                                                                                                   |  |
| $\forall(m : \alpha) (n : \alpha). (\lambda(x : \alpha) (y : \alpha). y = (f : \alpha \rightarrow \alpha) \, x)^* (f \, m) \, n \Leftrightarrow (\lambda(x : \alpha) (y : \alpha). y = f \, x)^+ m \, n$                                                                                                                                                                                                                                                                                   |  |
| $\forall(xs : \alpha \text{ list}) (n : \text{num}) (k : \text{num}). \text{DROP } n \, (\text{TAKE } k \, xs) = \text{TAKE } (k - n) \, (\text{DROP } n \, xs)$                                                                                                                                                                                                                                                                                                                           |  |
| $\forall(n : \text{num}) (l2 : \alpha \text{ list}). n < \text{LENGTH } l2 \Rightarrow \forall(l1 : \alpha \text{ list}). \text{ELL } n \, (l1 \, ++ \, l2) = \text{ELL } n \, l2$                                                                                                                                                                                                                                                                                                         |  |
| $(\emptyset_r : \alpha \rightarrow \alpha \rightarrow \text{bool}) \subseteq_r (R : \alpha \rightarrow \alpha \rightarrow \text{bool}) \wedge (R \subseteq_r (\emptyset_r : \alpha \rightarrow \alpha \rightarrow \text{bool})) \Leftrightarrow R = (\emptyset_r : \alpha \rightarrow \alpha \rightarrow \text{bool})$                                                                                                                                                                     |  |
| $\forall(P : \alpha \rightarrow \text{bool}) (ls : \alpha \text{ list}). \text{EXISTS } (\$ \neg \circ P) \, ls \Rightarrow \text{LENGTH } (\text{FILTER } P \, ls) < \text{LENGTH } ls$                                                                                                                                                                                                                                                                                                   |  |
| $\text{LIST\_BIND } (l : \alpha \text{ list}) (\lambda(x : \alpha). [x]) = l$                                                                                                                                                                                                                                                                                                                                                                                                              |  |
| $(\text{some}(x : \text{bool}). \neg x) = \text{SOME } F$                                                                                                                                                                                                                                                                                                                                                                                                                                  |  |
| $\forall(x : \alpha) (s : \alpha \rightarrow \text{bool}) (t : \alpha \rightarrow \text{bool}). s \subseteq x \, \text{INSERT } t \Leftrightarrow s \, \text{DELETE } x \subseteq t$                                                                                                                                                                                                                                                                                                       |  |
| $\forall(P : \alpha + \beta \rightarrow \text{bool}). (\forall(x : \alpha). P \, (\text{INL } x : \alpha + \beta)) \wedge (\forall(y : \beta). P \, (\text{INR } y : \alpha + \beta)) \Rightarrow \forall(s : \alpha + \beta). P \, s$                                                                                                                                                                                                                                                     |  |
| $\forall(P : \alpha \rightarrow \text{bool}) (a : \alpha) (s : \alpha \rightarrow \text{bool}). (\forall(x : \alpha). x \in a \, \text{INSERT } s \Rightarrow P \, x) \Leftrightarrow P \, a \wedge \forall(x : \alpha). x \in s \Rightarrow P \, x$                                                                                                                                                                                                                                       |  |
| $(\forall(x : \alpha). (P : \alpha \rightarrow \text{bool}) \, x \Rightarrow (Q : \alpha \rightarrow \text{bool}) \, x) \Rightarrow \text{EVERY } P \, (l : \alpha \text{ list}) \Rightarrow \text{EVERY } Q \, l$                                                                                                                                                                                                                                                                         |  |
| $(\text{LIST\_REL } (R : \alpha \rightarrow \beta \rightarrow \text{bool}) \, ([] : \alpha \text{ list}) \, (y : \beta \text{ list}) \Leftrightarrow y = ([] : \beta \text{ list})) \wedge (\text{LIST\_REL } R \, (x : \alpha \text{ list}) \, ([] : \beta \text{ list}) \Leftrightarrow x = ([] : \alpha \text{ list}))$                                                                                                                                                                 |  |



|                                                                                                                                                                                                                                                                                                                  |
|------------------------------------------------------------------------------------------------------------------------------------------------------------------------------------------------------------------------------------------------------------------------------------------------------------------|
| $\forall (l : \text{bool list}). \text{OR\_EL } l \Leftrightarrow \text{FOLDL } \$\vee \text{ F } l$                                                                                                                                                                                                             |
| $\forall (R : \alpha \rightarrow \alpha \rightarrow \text{bool}). \text{antisymmetric } (RC \ R) \Leftrightarrow \text{antisymmetric } R$                                                                                                                                                                        |
| $(\forall (x : \alpha) (y : \alpha). (R : \alpha \rightarrow \alpha \rightarrow \text{bool}) \ x \ y \Rightarrow (f : \alpha \rightarrow \beta) \ x = f \ y) \Rightarrow \forall (x : \alpha) (y : \alpha). R^* \ x \ y \Rightarrow f \ x = f \ y$                                                               |
| $\forall (x : \alpha) (s : \alpha \rightarrow \text{bool}). \text{PREIMAGE } (K \ x : \beta \rightarrow \alpha) \ s = \text{if } x \in s \text{ then } \mathbb{U}(:\beta) \text{ else } (\emptyset : \beta \rightarrow \text{bool})$                                                                             |
| $\forall (xs : \alpha \text{ list}) (i : \text{num}) (n : \text{num}) (x : \alpha). \text{oEL } n \ (\text{LUPDATE } x \ i \ xs) = \text{if } i \neq n \text{ then } \text{oEL } n \ xs \text{ else if } i < \text{LENGTH } xs \text{ then } \text{SOME } x \text{ else } (\text{NONE} : \alpha \text{ option})$ |
| $\forall (R : \alpha \rightarrow \alpha \rightarrow \text{bool}). \text{reflexive } R^*$                                                                                                                                                                                                                         |
| $(\text{list\_CASE } (x : \alpha \text{ list}) (v : \beta) (f : \alpha \rightarrow \alpha \text{ list} \rightarrow \beta) : \beta) = (v' : \beta) \Leftrightarrow x = ([] : \alpha \text{ list}) \wedge v = v' \vee \exists (a : \alpha) (l : \alpha \text{ list}). x = a :: l \wedge f \ a \ l = v'$            |
| $\forall (n : \text{num}) (l : \alpha \text{ list}). n \leq \text{LENGTH } l \Rightarrow \text{LASTN } n \ (\text{REVERSE } l) = \text{REVERSE } (\text{TAKE } n \ l)$                                                                                                                                           |
| $\forall (s : \alpha \rightarrow \text{bool}) (t : \alpha \rightarrow \text{bool}). s \subseteq t \wedge t \subseteq s \Leftrightarrow s = t$                                                                                                                                                                    |
| $(p : \text{bool}) \wedge (q : \text{bool}) \Rightarrow q$                                                                                                                                                                                                                                                       |
| $\forall (P : \alpha \rightarrow \text{bool}) (ls : \alpha \text{ list}). \text{dropWhile } P \ ls = ([] : \alpha \text{ list}) \Leftrightarrow \text{EVERY } P \ ls$                                                                                                                                            |
| $\forall (p : \alpha \rightarrow \text{bool}) (q : \alpha \rightarrow \text{bool}). p \cap q \cup \text{COMPL } p \cap q = q$                                                                                                                                                                                    |
| $((p : \text{bool}) \Leftrightarrow (q : \text{bool}) \Rightarrow (r : \text{bool})) \Leftrightarrow (p \vee q) \wedge (p \vee \neg r) \wedge (\neg q \vee r \vee \neg p)$                                                                                                                                       |
| $(\text{pair\_CASE } ((x : \beta), (y : \gamma)) (f : \beta \rightarrow \gamma \rightarrow \alpha) : \alpha) = f \ x \ y$                                                                                                                                                                                        |
| $\forall (s1 : (\alpha \rightarrow \text{bool}) \rightarrow \text{bool}) (s2 : (\alpha \rightarrow \text{bool}) \rightarrow \text{bool}). \text{BIGUNION } (s1 \cup s2) = \text{BIGUNION } s1 \cup \text{BIGUNION } s2$                                                                                          |
| $\text{FINITE } (s : \alpha \rightarrow \text{bool}) \wedge \text{SURJ } (f : \alpha \rightarrow \beta) \ s \ (t : \beta \rightarrow \text{bool}) \Rightarrow \text{FINITE } t$                                                                                                                                  |
| $\text{OPTION\_MAP } (f : \gamma \rightarrow \beta) (\text{OPTION\_MAP } (g : \alpha \rightarrow \gamma) (x : \alpha \text{ option})) = \text{OPTION\_MAP } (f \circ g) \ x$                                                                                                                                     |
| $\forall (f : \text{num} \rightarrow \alpha) (n : \text{num}). \text{set } (\text{GENLIST } f \ n) = \text{IMAGE } f \ (\text{count } n)$                                                                                                                                                                        |
| $\forall (m : \text{num}) (n : \text{num}). m = n \vee m < n \Rightarrow m < \text{SUC } n$                                                                                                                                                                                                                      |
| $\text{REVERSE } (l : \alpha \text{ list}) = [(e : \alpha)] \Leftrightarrow l = [e]$                                                                                                                                                                                                                             |
| $\forall (n : \text{num}). \text{SUM\_SET } \{n\} = n$                                                                                                                                                                                                                                                           |
| $\forall (f1 : \text{num} \rightarrow \text{num} \rightarrow \alpha \rightarrow \text{bool}) (f2 : \text{num} \rightarrow \text{num} \rightarrow \alpha \rightarrow \text{bool}). \text{ind\_type}\$ \text{INJF } f1 = \text{ind\_type}\$ \text{INJF } f2 \Leftrightarrow f1 = f2$                               |
| $\text{LIST\_REL } (R : \alpha \rightarrow \beta \rightarrow \text{bool}) ((h : \alpha) :: (t : \alpha \text{ list})) (xs : \beta \text{ list}) \Leftrightarrow \exists (h' : \beta) (t' : \beta \text{ list}). xs = h' :: t' \wedge R \ h \ h' \wedge \text{LIST\_REL } R \ t \ t'$                             |
| $\forall (n : \text{num}) (l : \alpha \text{ list}). n \leq \text{LENGTH } l \Rightarrow \forall (x : \alpha). \text{DROP } n \ (\text{SNOC } x \ l) = \text{SNOC } x \ (\text{DROP } n \ l)$                                                                                                                    |
| $\forall (x : \alpha) (y : \beta). \text{FST } (x, y) = x$                                                                                                                                                                                                                                                       |
| $\text{is\_measure\_maximal } (m : \alpha \rightarrow \text{num}) \{(x : \alpha)\} (y : \alpha) \Leftrightarrow y = x$                                                                                                                                                                                           |
| $\forall (P : \alpha \rightarrow \text{bool}) (l : \alpha \text{ list}). \text{EXISTS } P \ l \Leftrightarrow \neg \text{EVERY } (\lambda (x : \alpha). \neg P \ x) \ l$                                                                                                                                         |
| $\forall (x : \alpha \text{ option}). \text{IS\_NONE } x \Leftrightarrow x = (\text{NONE} : \alpha \text{ option})$                                                                                                                                                                                              |
| $\forall (x : \text{bool}) (x' : \text{bool}) (y : \text{bool}) (y' : \text{bool}). (y \Rightarrow x \Rightarrow x') \wedge (x' \Rightarrow y \Rightarrow y') \Rightarrow x \wedge y \Rightarrow x' \wedge y'$                                                                                                   |
| $(R : \alpha \rightarrow \alpha \rightarrow \text{bool}) \text{equiv\_on } (s : \alpha \rightarrow \text{bool}) \Rightarrow (\emptyset : \alpha \rightarrow \text{bool}) \notin \text{partition } R \ s$                                                                                                         |
| $\forall (R : \alpha \rightarrow \alpha \rightarrow \text{bool}) (x : \alpha) (y : \alpha). R \ x \ y \Rightarrow RC \ R \ x \ y$                                                                                                                                                                                |
| $\forall (a : \alpha \text{ list}) (b : \alpha \text{ list}) (c : \alpha \text{ list}). a \leq b ++ c \Rightarrow a \leq b \vee b \leq a$                                                                                                                                                                        |
| $\forall (n : \text{num}). \text{set } (\text{COUNT\_LIST } n) = \text{count } n$                                                                                                                                                                                                                                |
| $\forall (x : \alpha \text{ option option}) (y : \alpha). \text{OPTION\_JOIN } x = \text{SOME } y \Leftrightarrow x = \text{SOME } (\text{SOME } y)$                                                                                                                                                             |
| $\neg (A : \text{bool}) \Rightarrow F \Leftrightarrow A$                                                                                                                                                                                                                                                         |
| $\forall (s : \alpha \rightarrow \text{bool}). \text{REST } s \subseteq s$                                                                                                                                                                                                                                       |
| $\forall (R : \alpha \rightarrow \alpha \rightarrow \text{bool}) (f : \beta \rightarrow \alpha). \text{symmetric } R \Rightarrow \text{symmetric } (\text{inv\_image } R \ f)$                                                                                                                                   |
| $\forall (R : \alpha \rightarrow \alpha \rightarrow \text{bool}). RC \ (RC \ R) = RC \ R$                                                                                                                                                                                                                        |

|                                                                                                                                                                                                                                                                                                                                                                                                                                                                                                                                          |
|------------------------------------------------------------------------------------------------------------------------------------------------------------------------------------------------------------------------------------------------------------------------------------------------------------------------------------------------------------------------------------------------------------------------------------------------------------------------------------------------------------------------------------------|
| $\text{PRE } (0 : \text{num}) = (0 : \text{num}) \wedge \forall (m : \text{num}). \text{PRE } (\text{SUC } m) = m$                                                                                                                                                                                                                                                                                                                                                                                                                       |
| $\forall (l : \alpha \text{ list}). \text{TAKE } (\text{LENGTH } l) \ l = l$                                                                                                                                                                                                                                                                                                                                                                                                                                                             |
| $\forall (f : \alpha \rightarrow \beta) (x : \alpha \# \beta) (ls : \alpha \text{ list}). \text{ALL\_DISTINCT } ls \Rightarrow (\text{MEM } x (\text{ZIP } (ls, \text{MAP } f \ ls))) \Leftrightarrow \text{MEM } (\text{FST } x) \ ls \wedge \text{SND } x = f (\text{FST } x)$                                                                                                                                                                                                                                                         |
| $\text{LIST\_BIND } (l : \alpha \text{ list list}) (\lambda (x : \alpha \text{ list}). x) = \text{FLAT } l \wedge \text{LIST\_BIND } l (l : \alpha \text{ list} \rightarrow \alpha \text{ list}) = \text{FLAT } l$                                                                                                                                                                                                                                                                                                                       |
| $\forall (v\_old : \alpha) (v\_new : \beta) (\text{rows\_old} : (\alpha \rightarrow \gamma \text{ option}) \text{ list}) (\text{rows\_new} : (\beta \rightarrow \gamma \text{ option}) \text{ list})$<br>$(r\_old : \alpha \rightarrow \gamma \text{ option}). r\_old \ v\_old = (\text{NONE} : \gamma \text{ option}) \Rightarrow \text{PMATCH } v\_old \ \text{rows\_old} =$<br>$\text{PMATCH } v\_new \ \text{rows\_new} \Rightarrow \text{PMATCH } v\_old \ (r\_old :: \text{rows\_old}) = \text{PMATCH } v\_new \ \text{rows\_new}$ |
| $\forall (x1 : \alpha \text{ option}) (x2 : \alpha \text{ option}) (y1 : \beta \text{ option}) (y2 : \beta \text{ option}) (f1 : \alpha \rightarrow \beta \rightarrow \gamma) (f2 : \alpha \rightarrow \beta \rightarrow \gamma).$<br>$x1 = x2 \wedge y1 = y2 \wedge (\forall (x : \alpha) (y : \beta). x2 = \text{SOME } x \wedge y2 = \text{SOME } y \Rightarrow f1 \ x \ y = f2 \ x \ y) \Rightarrow$<br>$\text{OPTION\_MAP2 } f1 \ x1 \ y1 = \text{OPTION\_MAP2 } f2 \ x2 \ y2$                                                      |
| $\forall (l1 : \alpha \text{ list}) (l2 : \alpha \text{ list}). l1 = \text{REVERSE } l2 \Leftrightarrow l2 = \text{REVERSE } l1$                                                                                                                                                                                                                                                                                                                                                                                                         |
| $\forall (x : \alpha) (y : \beta) (l : (\alpha \# \beta) \text{ list}). \text{MEM } (x, y) \ l \Rightarrow \exists (z : \alpha \# \beta). x = \text{FST } z \wedge \text{MEM } z \ l$                                                                                                                                                                                                                                                                                                                                                    |
| $\$? (\text{UNCURRY } (\lambda (x : \alpha). (P : \alpha \rightarrow \beta \rightarrow \text{bool}) \ x)) \Leftrightarrow \exists (x : \alpha). \$? (P \ x)$                                                                                                                                                                                                                                                                                                                                                                             |
| $\forall (s : \alpha \rightarrow \text{bool}). s \subseteq \mathbb{U}(:\alpha)$                                                                                                                                                                                                                                                                                                                                                                                                                                                          |
| $\forall (f : \alpha \rightarrow \text{num}) (g : \alpha \rightarrow \text{num}) (ls : \alpha \text{ list}). \text{SUM } (\text{MAP } (\lambda (x : \alpha). f \ x + g \ x) \ ls) = \text{SUM } (\text{MAP } f \ ls) +$<br>$\text{SUM } (\text{MAP } g \ ls)$                                                                                                                                                                                                                                                                            |
| $(\forall (p : \alpha \# \beta). (P : \alpha \rightarrow \beta \rightarrow \text{bool}) (\text{FST } p) (\text{SND } p)) \Leftrightarrow \forall (p1 : \alpha) (p2 : \beta). P \ p1 \ p2$                                                                                                                                                                                                                                                                                                                                                |
| $\forall (P : \alpha \rightarrow \text{bool}) (L : \alpha \text{ list}) (x : \alpha). \text{MEM } x (\text{FILTER } P \ L) \Leftrightarrow P \ x \wedge \text{MEM } x \ L$                                                                                                                                                                                                                                                                                                                                                               |
| $\forall (j : \text{num}) (n : \text{num}) (h : \alpha) (t : \alpha \text{ list}). (0 : \text{num}) < j \wedge n + j \leq \text{LENGTH } t + (1 : \text{num}) \Rightarrow \text{SEG } n \ j$<br>$(h :: t) = \text{SEG } n \ (j - (1 : \text{num})) \ t$                                                                                                                                                                                                                                                                                  |
| $\forall (s : \alpha \rightarrow \text{bool}) (t : \alpha \rightarrow \text{bool}). s \ \text{DIFF } t = s \cap \text{COMPL } t$                                                                                                                                                                                                                                                                                                                                                                                                         |
| $(\$ \text{SUBSET} : (\alpha \rightarrow \text{bool}) \rightarrow (\alpha \rightarrow \text{bool}) \rightarrow \text{bool})^* = (\$ \text{SUBSET} : (\alpha \rightarrow \text{bool}) \rightarrow (\alpha \rightarrow \text{bool}) \rightarrow$<br>$\text{bool})$                                                                                                                                                                                                                                                                         |
| $\forall (h : \alpha) (t : \alpha \text{ list}). \text{TL } (h :: t) = t$                                                                                                                                                                                                                                                                                                                                                                                                                                                                |
| $\forall (l : \alpha \text{ list}). l \neq [] : \alpha \text{ list} \Rightarrow \text{LENGTH } (\text{FRONT } l) = \text{PRE } (\text{LENGTH } l)$                                                                                                                                                                                                                                                                                                                                                                                       |
| $\forall (l : \alpha \text{ list}). l = [] : \alpha \text{ list} \vee \exists (h : \alpha) (t : \alpha \text{ list}). l = h :: t$                                                                                                                                                                                                                                                                                                                                                                                                        |
| $((p : \text{bool}) \Leftrightarrow ((q : \text{bool}) \Leftrightarrow (r : \text{bool}))) \Leftrightarrow (p \vee q \vee r) \wedge (p \vee \neg r \vee \neg q) \wedge (q \vee \neg r \vee \neg p) \wedge (r \vee \neg q \vee \neg p)$                                                                                                                                                                                                                                                                                                   |
| $\mathbb{U}(:\alpha) \neq (\emptyset : \alpha \rightarrow \text{bool})$                                                                                                                                                                                                                                                                                                                                                                                                                                                                  |
| $((f : (\alpha \rightarrow \beta) \text{ option}) <*> \text{SOME } (x : \alpha)) : \beta \text{ option} = ((\text{SOME } (\lambda (f : \alpha \rightarrow \beta). f \ x) <*> f) : \beta \text{ option})$                                                                                                                                                                                                                                                                                                                                 |
| $((a : \alpha), (b : \beta)) \in \{((x : \alpha), y) \mid (P : \beta \rightarrow \text{bool}) \ y\} \Leftrightarrow P \ b \wedge a = x$                                                                                                                                                                                                                                                                                                                                                                                                  |
| $\forall (x : \alpha + \beta). \neg \text{ISL } x \Leftrightarrow \text{ISR } x$                                                                                                                                                                                                                                                                                                                                                                                                                                                         |
| $\forall (n : \text{num}). \text{LENGTH } (\text{FLAT } (\text{REPLICATE } n \ (ls : \alpha \text{ list}))) = n * \text{LENGTH } ls$                                                                                                                                                                                                                                                                                                                                                                                                     |
| $\text{LIST\_BIND } (\text{MAP } (f : \gamma \rightarrow \beta) (l : \gamma \text{ list})) (g : \beta \rightarrow \alpha \text{ list}) = \text{LIST\_BIND } l (g \circ f)$                                                                                                                                                                                                                                                                                                                                                               |
| $\forall (f : \alpha \rightarrow \beta). (\forall (x : \alpha) (y : \alpha). f \ x = f \ y \Rightarrow x = y) \Rightarrow \forall (s : \alpha \rightarrow \text{bool}). \text{INFINITE } s \Rightarrow \text{INFINITE}$<br>$(\text{IMAGE } f \ s)$                                                                                                                                                                                                                                                                                       |
| $\forall (n : \text{num}) (f : \text{num} \rightarrow \alpha). \text{NULL } (\text{GENLIST } f \ n) \Leftrightarrow n = (0 : \text{num})$                                                                                                                                                                                                                                                                                                                                                                                                |
| $(\forall (x : \alpha) (y : \alpha). (R : \alpha \rightarrow \alpha \rightarrow \text{bool}) \ x \ y \Rightarrow (Q : \alpha \rightarrow \alpha \rightarrow \text{bool}) \ x \ y) \Rightarrow \text{RC } R \ (x : \alpha) (y : \alpha) \Rightarrow \text{RC } Q \ x \ y$                                                                                                                                                                                                                                                                 |
| $\forall (P : \alpha \rightarrow \text{bool}) (Q : \alpha \rightarrow \text{bool}). P \subseteq Q \Rightarrow \forall (x : \alpha). x \in P \Rightarrow x \in Q$                                                                                                                                                                                                                                                                                                                                                                         |
| $\forall (x : \alpha) (s : \alpha \rightarrow \text{bool}). x \ \text{INSERT } x \ \text{INSERT } s = x \ \text{INSERT } s$                                                                                                                                                                                                                                                                                                                                                                                                              |
| $\forall (l : \alpha \text{ list}). \text{REVERSE } (\text{REVERSE } l) = l$                                                                                                                                                                                                                                                                                                                                                                                                                                                             |

|                                                                                                                                                                                                                                                                                                                                                                                                                                                                                                                                       |
|---------------------------------------------------------------------------------------------------------------------------------------------------------------------------------------------------------------------------------------------------------------------------------------------------------------------------------------------------------------------------------------------------------------------------------------------------------------------------------------------------------------------------------------|
| $\text{ind\_type\$ISO } (\lambda(x : \alpha). x) (\lambda(x : \alpha). x)$                                                                                                                                                                                                                                                                                                                                                                                                                                                            |
| $\forall (s : \alpha \rightarrow \text{bool}) (t : \alpha \rightarrow \text{bool}). s = t \Leftrightarrow s \subseteq t \wedge t \subseteq s$                                                                                                                                                                                                                                                                                                                                                                                         |
| $\forall (R : \alpha \rightarrow \alpha \rightarrow \text{bool}) (P : \alpha \rightarrow \alpha \rightarrow \text{bool}). (\forall (x : \alpha). P \ x \ x) \wedge (\forall (x : \alpha) (y : \alpha) (z : \alpha). P \ x \ y \wedge R \ y \ z \Rightarrow P \ x \ z) \Rightarrow \forall (x : \alpha) (y : \alpha). R^* \ x \ y \Rightarrow P \ x \ y$                                                                                                                                                                               |
| $\text{EVERY } (P : \alpha \rightarrow \text{bool}) (\text{FLAT } (ls : \alpha \text{ list list})) \Leftrightarrow \text{EVERY } (\text{EVERY } P) \text{ ls}$                                                                                                                                                                                                                                                                                                                                                                        |
| $(\forall (l : \alpha \text{ list}). \text{LASTN } (0 : \text{num}) \ l = ([] : \alpha \text{ list})) \wedge \forall (n : \text{num}) (x : \beta) (l : \beta \text{ list}). \text{LASTN } (\text{SUC } n) (\text{SNOC } x \ l) = \text{SNOC } x (\text{LASTN } n \ l)$                                                                                                                                                                                                                                                                |
| $((\forall (n : \text{num}). \neg (P : \text{num} \rightarrow \text{bool}) \ n) \Rightarrow (Q : \text{num option} \rightarrow \text{bool}) (\text{NONE} : \text{num option})) \wedge (\forall (n : \text{num}). P \ n \wedge (\forall (m : \text{num}). m < n \Rightarrow \neg P \ m) \Rightarrow Q (\text{SOME } n)) \Rightarrow Q (\text{\$OLEAST } P)$                                                                                                                                                                            |
| $(\forall (l : \alpha \text{ list}). l ++ ([] : \alpha \text{ list}) = l) \wedge \forall (l : \beta \text{ list}). ([] : \beta \text{ list}) ++ l = l$                                                                                                                                                                                                                                                                                                                                                                                |
| $\forall (c : \text{bool}) (l : \alpha \text{ list}). \text{EVERY } (\lambda(x : \alpha). c) \ l \Leftrightarrow l = ([] : \alpha \text{ list}) \vee c$                                                                                                                                                                                                                                                                                                                                                                               |
| $\forall (s : \alpha \rightarrow \text{bool}) (t : \alpha \rightarrow \text{bool}). s \neq t \Leftrightarrow \exists (x : \alpha). x \in t \Leftrightarrow x \notin s$                                                                                                                                                                                                                                                                                                                                                                |
| $\text{PMATCH } (v : \beta) (\text{rows} : (\beta \rightarrow \alpha \text{ option}) \text{ list}) = \text{PMATCH } v (\text{SNOC } (\text{PMATCH\_ROW } (\lambda(_0 : \beta). _0) (\lambda(_0 : \beta). T) (\lambda(_0 : \beta). (\text{ARB } \alpha)))) \text{ rows}$                                                                                                                                                                                                                                                               |
| $\forall (x : \alpha \# \beta) (l : (\alpha \# \beta) \text{ list}). \text{UNZIP } (\text{SNOC } x \ l) = (\text{SNOC } (\text{FST } x) (\text{FST } (\text{UNZIP } l)), \text{SNOC } (\text{SND } x) (\text{SND } (\text{UNZIP } l)))$                                                                                                                                                                                                                                                                                               |
| $\forall (X : \alpha). (P : \text{bool}) \Leftrightarrow \text{Case } X \Rightarrow P$                                                                                                                                                                                                                                                                                                                                                                                                                                                |
| $(\forall (l : \alpha \text{ list}). (P : \alpha \text{ list} \rightarrow \text{bool}) \ l) \Leftrightarrow P ([] : \alpha \text{ list}) \wedge \forall (h : \alpha) (t : \alpha \text{ list}). P (h::t)$                                                                                                                                                                                                                                                                                                                             |
| $\forall (f : \alpha \rightarrow \beta). (\forall (s : \beta \rightarrow \text{bool}). \text{BIJ } f (\emptyset : \alpha \rightarrow \text{bool}) \ s \Leftrightarrow s = (\emptyset : \beta \rightarrow \text{bool})) \wedge \forall (s : \alpha \rightarrow \text{bool}). \text{BIJ } f \ s (\emptyset : \beta \rightarrow \text{bool}) \Leftrightarrow s = (\emptyset : \alpha \rightarrow \text{bool})$                                                                                                                           |
| $\forall (P : \alpha \rightarrow \text{bool}) (f : \beta \rightarrow \alpha) (s : \beta \rightarrow \text{bool}). (\forall (y : \alpha). y \in \text{IMAGE } f \ s \Rightarrow P \ y) \Leftrightarrow \forall (x : \beta). x \in s \Rightarrow P (f \ x)$                                                                                                                                                                                                                                                                             |
| $\forall (s : \alpha \rightarrow \text{bool}). \text{INJ } (\lambda(x : \alpha). x) \ s \ s$                                                                                                                                                                                                                                                                                                                                                                                                                                          |
| $\forall (f : \alpha \rightarrow \beta) (s : \alpha \rightarrow \text{bool}) (t : \beta \rightarrow \text{bool}). \text{INJ } f \ s \ t \Rightarrow \forall (e : \alpha). e \in s \Rightarrow \text{INJ } f (s \ \text{DELETE } e) (t \ \text{DELETE } f \ e)$                                                                                                                                                                                                                                                                        |
| $\forall (P : \alpha \rightarrow \text{bool}) (l : \alpha \text{ list}). \text{EVERY } (\lambda(x : \alpha). \neg P \ x) \ l \Rightarrow \text{SPLITP } P \ l = (l, ([] : \alpha \text{ list}))$                                                                                                                                                                                                                                                                                                                                      |
| $\forall (x : \alpha \rightarrow \text{bool}) (y : \text{bool}). x \subseteq (K \ y : \alpha \rightarrow \text{bool}) \Leftrightarrow x \subseteq (\emptyset : \alpha \rightarrow \text{bool}) \vee y$                                                                                                                                                                                                                                                                                                                                |
| $\forall (a1 : \alpha) (a2 : \alpha). \text{ind\_type\$INJA } a1 = \text{ind\_type\$INJA } a2 \Leftrightarrow a1 = a2$                                                                                                                                                                                                                                                                                                                                                                                                                |
| $\forall (R : \alpha \rightarrow \alpha \rightarrow \text{bool}). (\text{SC } R)^T = \text{SC } R \wedge \text{SC } R^T = \text{SC } R$                                                                                                                                                                                                                                                                                                                                                                                               |
| $\forall (s : \alpha \rightarrow \text{bool}) (P : (\alpha \rightarrow \text{bool}) \rightarrow \text{bool}). \text{BIGUNION } (s \ \text{INSERT } P) = s \cup \text{BIGUNION } P$                                                                                                                                                                                                                                                                                                                                                    |
| $\forall (t : \text{bool}). T \Rightarrow t \Leftrightarrow t$                                                                                                                                                                                                                                                                                                                                                                                                                                                                        |
| $\forall (B : \alpha \rightarrow \text{bool}) (C : \alpha \rightarrow \alpha) (R : \alpha \rightarrow \alpha \rightarrow \text{bool}). \text{WF } R \wedge (\forall (s : \alpha). B \ s \Rightarrow R (C \ s) \ s) \Rightarrow \forall (P : \alpha \rightarrow \text{bool}). (\forall (s : \alpha). (B \ s \Rightarrow P (C \ s)) \Rightarrow P \ s) \Rightarrow \forall (v : \alpha). P \ v$                                                                                                                                         |
| $\text{WF } (\emptyset_r : \alpha \rightarrow \alpha \rightarrow \text{bool})$                                                                                                                                                                                                                                                                                                                                                                                                                                                        |
| $\text{ZIP } (([] : \gamma \text{ list}), ([] : \delta \text{ list})) = ([] : (\gamma \# \delta) \text{ list}) \wedge \forall (x1 : \alpha) (l1 : \alpha \text{ list}) (x2 : \beta) (l2 : \beta \text{ list}). \text{ZIP } (x1::l1, x2::l2) = (x1, x2)::\text{ZIP } (l1, l2)$                                                                                                                                                                                                                                                         |
| $\forall (x : \alpha) (L : \alpha \text{ list list}). \text{MEM } x (\text{FLAT } L) \Leftrightarrow \exists (l : \alpha \text{ list}). \text{MEM } l \ L \wedge \text{MEM } x \ l$                                                                                                                                                                                                                                                                                                                                                   |
| $\text{GSPEC } (f : \beta \rightarrow \alpha \# \text{bool}) = \text{IMAGE } ((\text{FST } : \alpha \# \text{bool} \rightarrow \alpha) \circ f) ((\text{SND } : \alpha \# \text{bool} \rightarrow \text{bool}) \circ f)$                                                                                                                                                                                                                                                                                                              |
| $\forall (\text{adjacent}' : \alpha \text{ list} \rightarrow \alpha \rightarrow \alpha \rightarrow \text{bool}). (\forall (a : \alpha) (b : \alpha) (t : \alpha \text{ list}). \text{adjacent}' (a::b::t) \ a \ b) \wedge (\forall (a : \alpha) (b : \alpha) (h : \alpha) (t : \alpha \text{ list}). \text{adjacent}' \ t \ a \ b \Rightarrow \text{adjacent}' (h::t) \ a \ b) \Rightarrow \forall (a0 : \alpha \text{ list}) (a1 : \alpha) (a2 : \alpha). \text{adjacent } a0 \ a1 \ a2 \Rightarrow \text{adjacent}' \ a0 \ a1 \ a2$ |
| $\forall (m : \text{num}) (n : \text{num}) (l : \alpha \text{ list}). n + m \leq \text{LENGTH } l \Rightarrow \text{BUTLASTN } n (\text{BUTLASTN } m \ l) = \text{BUTLASTN } (n + m) \ l$                                                                                                                                                                                                                                                                                                                                             |
| $\text{trichotomous } (\text{RC } (R : \alpha \rightarrow \alpha \rightarrow \text{bool})) \Leftrightarrow \text{trichotomous } R$                                                                                                                                                                                                                                                                                                                                                                                                    |

|                                                                                                                                                                                                                                                                                                                                                                                                                                                             |
|-------------------------------------------------------------------------------------------------------------------------------------------------------------------------------------------------------------------------------------------------------------------------------------------------------------------------------------------------------------------------------------------------------------------------------------------------------------|
| $\forall (n : \text{num}) (l : \alpha \text{ list}). n \leq \text{LENGTH } l \Rightarrow \text{BUTLASTN } n (\text{REVERSE } l) = \text{REVERSE } (\text{DROP } n l)$                                                                                                                                                                                                                                                                                       |
| $\forall (s : \alpha \rightarrow \text{bool}) (t : \alpha \rightarrow \text{bool}). s \text{ DIFF } t = (\emptyset : \alpha \rightarrow \text{bool}) \Leftrightarrow s \subseteq t$                                                                                                                                                                                                                                                                         |
| $\forall (s : \alpha \rightarrow \text{bool}) (t : \alpha \rightarrow \text{bool}). s \subseteq t \Rightarrow t \cap s = s$                                                                                                                                                                                                                                                                                                                                 |
| $\forall (f : \beta \rightarrow \gamma) (g : \alpha \rightarrow \beta). \text{MAP } (f \circ g) = \text{MAP } f \circ \text{MAP } g$                                                                                                                                                                                                                                                                                                                        |
| $(\forall (x : \text{unit}). (P : \text{unit} \rightarrow \text{bool}) x) \Leftrightarrow P ()$                                                                                                                                                                                                                                                                                                                                                             |
| $\forall (f : 'z \rightarrow 'z). \text{INVOL } f \Rightarrow \forall (a : 'z) (b : 'z). f a = b \Leftrightarrow a = f b$                                                                                                                                                                                                                                                                                                                                   |
| $\text{OPTION\_CHOICE } (m1 : \alpha \text{ option}) (m2 : \alpha \text{ option}) = (\text{NONE} : \alpha \text{ option}) \Leftrightarrow m1 = (\text{NONE} : \alpha \text{ option}) \wedge m2 = (\text{NONE} : \alpha \text{ option})$                                                                                                                                                                                                                     |
| $\forall (l : \alpha \text{ list}) (n : \text{num}). \text{LENGTH } l = \text{SUC } n \Leftrightarrow \exists (h : \alpha) (l' : \alpha \text{ list}). \text{LENGTH } l' = n \wedge l = h :: l'$                                                                                                                                                                                                                                                            |
| $\forall (R : \alpha \rightarrow \alpha \rightarrow \text{bool}) (x : \alpha) (y : \alpha). R^\circ x y \Leftrightarrow x = y \vee \exists (u : \alpha). R^\circ x u \wedge R u y$                                                                                                                                                                                                                                                                          |
| $(\forall (s : \alpha \rightarrow \text{bool}) (t : \alpha \rightarrow \text{bool}). s \cap t \subseteq s) \wedge (\forall (s : \alpha \rightarrow \text{bool}) (t : \alpha \rightarrow \text{bool}). t \cap s \subseteq s)$                                                                                                                                                                                                                                |
| $\text{reflexive } (\$ \text{SUBSET} : (\alpha \rightarrow \text{bool}) \rightarrow (\alpha \rightarrow \text{bool}) \rightarrow \text{bool})$                                                                                                                                                                                                                                                                                                              |
| $\forall (xs : \alpha \text{ list}) (n : \text{num}) (y : \alpha). \text{oEL } n xs = \text{SOME } y \Leftrightarrow n < \text{LENGTH } xs \wedge y = \text{EL } n xs$                                                                                                                                                                                                                                                                                      |
| $\forall (s : \beta \rightarrow \text{bool}). \text{FUNSET } (\emptyset : \alpha \rightarrow \text{bool}) s = \mathbb{U} : (\alpha \rightarrow \beta)$                                                                                                                                                                                                                                                                                                      |
| $\forall (l1 : \alpha \text{ list list}) (l2 : \alpha \text{ list list}). \text{FLAT } (l1 ++ l2) = \text{FLAT } l1 ++ \text{FLAT } l2$                                                                                                                                                                                                                                                                                                                     |
| $\text{FLAT } ([ ] : \alpha \text{ list list}) = ([ ] : \alpha \text{ list}) \wedge \text{FLAT } ([ ( ] : \beta \text{ list}) :: (t : \beta \text{ list list}) ) = \text{FLAT } t \wedge \text{FLAT } (((h : \gamma) :: (t1 : \gamma \text{ list})) :: (t2 : \gamma \text{ list list}) ) = h :: \text{FLAT } (t1 :: t2)$                                                                                                                                    |
| $\forall (P : \alpha \rightarrow \text{bool}) (x : \alpha) (l : \alpha \text{ list}). \text{FILTER } P (\text{SNOC } x l) = \text{if } P x \text{ then } \text{SNOC } x (\text{FILTER } P l) \text{ else } \text{FILTER } P l$                                                                                                                                                                                                                              |
| $\forall (x : \alpha). (\emptyset : \alpha \rightarrow \text{bool}) \neq \{x\}$                                                                                                                                                                                                                                                                                                                                                                             |
| $(\exists (l : \alpha \text{ list}). (P : \alpha \text{ list} \rightarrow \text{bool}) l) \Leftrightarrow P ([ ] : \alpha \text{ list}) \vee \exists (h : \alpha) (t : \alpha \text{ list}). P (h :: t)$                                                                                                                                                                                                                                                    |
| $\text{ind\_type\$ISO } (f : \alpha \rightarrow \beta) (g : \beta \rightarrow \alpha) \Rightarrow (\forall (P : \alpha \rightarrow \text{bool}). (\forall (x : \alpha). P x) \Leftrightarrow \forall (x : \beta). P (g x)) \wedge (\forall (P : \alpha \rightarrow \text{bool}). (\exists (x : \alpha). P x) \Leftrightarrow \exists (x : \beta). P (g x)) \wedge \forall (a : \alpha) (b : \beta). a = g b \Leftrightarrow f a = b$                        |
| $\forall (f : \alpha \rightarrow \beta \rightarrow \beta) (b : \beta). \text{ITSET } f (\emptyset : \alpha \rightarrow \text{bool}) b = b$                                                                                                                                                                                                                                                                                                                  |
| $(\forall (x : \alpha) (xs : \alpha \text{ list}). \text{FRONT } (x :: xs) = ([ ] : \alpha \text{ list}) \Leftrightarrow xs = ([ ] : \alpha \text{ list})) \wedge (\forall (x : \alpha) (xs : \alpha \text{ list}). ([ ] : \alpha \text{ list}) = \text{FRONT } (x :: xs) \Leftrightarrow xs = ([ ] : \alpha \text{ list})) \wedge \forall (x : \alpha) (xs : \alpha \text{ list}). \text{NULL } (\text{FRONT } (x :: xs)) \Leftrightarrow \text{NULL } xs$ |
| $(0 : \text{num}) < \text{SUC } (0 : \text{num})$                                                                                                                                                                                                                                                                                                                                                                                                           |
| $\forall (e : \alpha) (l : \alpha \text{ list}) (h : \alpha). \text{MEM } e l \wedge e \neq \text{LAST } (h :: l) \Rightarrow \text{MEM } e (\text{FRONT } (h :: l))$                                                                                                                                                                                                                                                                                       |
| $\forall (f : \alpha \rightarrow \beta \rightarrow \alpha) (e : \alpha) (P : \beta \rightarrow \text{bool}) (l : \beta \text{ list}). \text{FOLDL } f e (\text{FILTER } P l) = \text{FOLDL } (\lambda (x : \alpha) (y : \beta). \text{if } P y \text{ then } f x y \text{ else } x) e l$                                                                                                                                                                    |
| $\forall (x : \alpha \text{ list}). ([ ] : \alpha \text{ list}) \leq x \wedge (x \leq ([ ] : \alpha \text{ list}) \Leftrightarrow x = ([ ] : \alpha \text{ list}))$                                                                                                                                                                                                                                                                                         |
| $\forall (x : \alpha). \text{FINITE } \{x\}$                                                                                                                                                                                                                                                                                                                                                                                                                |
| $\forall (f : (\alpha \rightarrow \text{bool}) \rightarrow \text{bool}) (g : (\alpha \rightarrow \text{bool}) \rightarrow \text{bool}). f \subseteq g \Rightarrow \text{BIGUNION } f \subseteq \text{BIGUNION } g$                                                                                                                                                                                                                                          |
| $\forall (l1 : \alpha \text{ list}) (l2 : \alpha \text{ list}). \text{REVERSE } l1 = \text{REVERSE } l2 \Leftrightarrow l1 = l2$                                                                                                                                                                                                                                                                                                                            |
| $\forall (a1 : \alpha \text{ list}) (a0 : \alpha). ([ ] : \alpha \text{ list}) \neq a0 :: a1$                                                                                                                                                                                                                                                                                                                                                               |
| $\text{DROP } (0 : \text{num}) (l : \alpha \text{ list}) = l$                                                                                                                                                                                                                                                                                                                                                                                               |
| $\forall (l : \alpha \text{ list}) (n1 : \text{num}) (n2 : \text{num}). \text{ALL\_DISTINCT } l \wedge n1 < \text{LENGTH } l \wedge n2 < \text{LENGTH } l \Rightarrow (\text{EL } n1 l = \text{EL } n2 l \Leftrightarrow n1 = n2)$                                                                                                                                                                                                                          |
| $\forall (ls : \alpha \text{ list list}). \text{set } (\text{FLAT } ls) = \text{BIGUNION } (\text{set } (\text{MAP } (\text{set} : \alpha \text{ list} \rightarrow \alpha \rightarrow \text{bool}) ls))$                                                                                                                                                                                                                                                    |
| $\forall (s : \alpha \rightarrow \text{bool}). \text{FINITE } s \Rightarrow \forall (x : \alpha). \text{MEM } x (\text{SET\_TO\_LIST } s) \Leftrightarrow x \in s$                                                                                                                                                                                                                                                                                          |
| $\forall (f : \alpha \rightarrow \gamma) (g : \beta \rightarrow \delta) (z : \alpha + \beta). \text{SUM\_MAP } f g z = (\text{sum\_CASE } z ((\text{INL} : \gamma \rightarrow \gamma + \delta) \circ f) ((\text{INR} : \delta \rightarrow \gamma + \delta) \circ g) : \gamma + \delta)$                                                                                                                                                                     |
| $(\emptyset : \alpha \rightarrow \text{bool}) \neq \mathbb{U} : (\alpha)$                                                                                                                                                                                                                                                                                                                                                                                   |

|                                                                                                                                                                                                                                                                                                                                                        |
|--------------------------------------------------------------------------------------------------------------------------------------------------------------------------------------------------------------------------------------------------------------------------------------------------------------------------------------------------------|
| $\forall (ls : \alpha \text{ list}) (n : \text{num}). \text{ALL\_DISTINCT } ls \Rightarrow \text{ALL\_DISTINCT } (\text{DROP } n \text{ } ls)$                                                                                                                                                                                                         |
| $\forall (s : \alpha \rightarrow \text{bool}) (t : \alpha \rightarrow \text{bool}). \text{DISJOINT } s \ t \Leftrightarrow \neg \exists (x : \alpha). x \in s \wedge x \in t$                                                                                                                                                                          |
| $\forall (P : \alpha \rightarrow \text{bool}) (Q : \alpha \rightarrow \text{bool}). \{x \mid P \ x \wedge Q \ x\} = \{x \mid P \ x\} \cap \{x \mid Q \ x\}$                                                                                                                                                                                            |
| $\forall (P : \alpha \rightarrow \text{bool}) (l : \alpha \text{ list}). \text{FILTER } P \ l \neq ([]) : \alpha \text{ list} \Leftrightarrow \exists (x : \alpha). \text{MEM } x \ l \wedge P \ x$                                                                                                                                                    |
| $\forall (n : \text{num}) (l : \alpha \text{ list}). \text{TAKE } n \ l ++ \text{DROP } n \ l = l$                                                                                                                                                                                                                                                     |
| $\forall (x : \alpha) (s : \alpha \rightarrow \text{bool}). \text{COMPL } s \ x \Leftrightarrow x \notin s$                                                                                                                                                                                                                                            |
| $\forall (l : \alpha \text{ list}). \text{LENGTH } (\text{REVERSE } l) = \text{LENGTH } l$                                                                                                                                                                                                                                                             |
| $\text{MAP } (f : \text{num} \rightarrow \alpha) (\text{COUNT\_LIST } (n : \text{num})) = \text{GENLIST } f \ n$                                                                                                                                                                                                                                       |
| $\{(x,y) \mid (P : \alpha \rightarrow \beta \rightarrow \text{bool}) \ x \ y\} = \text{UNCURRY } P$                                                                                                                                                                                                                                                    |
| $\forall (s : \alpha \rightarrow \text{bool}) (x : \alpha) (x' : \alpha). (x \in s \Leftrightarrow x' \in s) \Leftrightarrow (x \in s \text{ DELETE } x' \Leftrightarrow x' \in s \text{ DELETE } x)$                                                                                                                                                  |
| $(\forall (x : \alpha). (P : \alpha \rightarrow \text{bool}) \ x \Rightarrow (P' : \alpha \rightarrow \text{bool}) \ x) \wedge (\forall (y : \beta). (Q : \beta \rightarrow \text{bool}) \ y \Rightarrow (Q' : \beta \rightarrow \text{bool}) \ y) \Rightarrow \text{SUM\_ALL } P \ Q \ (s : \alpha + \beta) \Rightarrow \text{SUM\_ALL } P' \ Q' \ s$ |
| $\forall (p : \text{bool}) (q : \text{bool}) (m : \text{bool}). (\text{stmarker } m \wedge p \Leftrightarrow p \wedge \text{stmarker } m) \wedge (p \wedge q \wedge \text{stmarker } m \Leftrightarrow (p \wedge q) \wedge \text{stmarker } m) \wedge ((p \wedge \text{stmarker } m) \wedge q \Leftrightarrow (p \wedge q) \wedge \text{stmarker } m)$ |
| $(\text{LEAST}(n : \text{num}). n = (x : \text{num})) = x \wedge (\text{LEAST}(n : \text{num}). x = n) = x$                                                                                                                                                                                                                                            |
| $\forall (f : \alpha \rightarrow \beta \rightarrow \alpha) (e : \alpha) (l : \beta \text{ list}). \text{FOLDL } f \ e \ (\text{REVERSE } l) = \text{FOLDER } (\lambda(x : \beta) (y : \alpha). f \ y \ x) \ e \ l$                                                                                                                                     |
| $(\text{Case } (X : \alpha) \wedge (Y : \text{bool}) \Leftrightarrow Y) \wedge (Y \wedge \text{Case } X \Leftrightarrow Y) \wedge (\text{Case } X \Rightarrow Y \Leftrightarrow Y)$                                                                                                                                                                    |
| $\forall (s : \alpha \rightarrow \text{bool}) (t : \alpha \rightarrow \text{bool}) (u : \alpha \rightarrow \text{bool}). s \cup t \subseteq u \Leftrightarrow s \subseteq u \wedge t \subseteq u$                                                                                                                                                      |
| $\forall (pl : (\alpha \# \beta) \text{ list}). \text{LENGTH } (\text{FST } (\text{UNZIP } pl)) = \text{LENGTH } pl \wedge \text{LENGTH } (\text{SND } (\text{UNZIP } pl)) = \text{LENGTH } pl$                                                                                                                                                        |
| $\forall (p : \alpha \rightarrow \text{bool}). p \ (\text{UNIV\_POINT } p) \Leftrightarrow \forall (x : \alpha). p \ x$                                                                                                                                                                                                                                |
| $\text{DATATYPE } ((\text{list} : \alpha \text{ list} \rightarrow (\alpha \rightarrow \alpha \text{ list} \rightarrow \alpha \text{ list}) \rightarrow \text{bool}) ([]) : \alpha \text{ list}) (\text{CONS} : \alpha \rightarrow \alpha \text{ list} \rightarrow \alpha \text{ list}))$                                                               |
| $\text{LIST\_BIND } (\text{LIST\_BIND } (l : \gamma \text{ list}) (g : \gamma \rightarrow \beta \text{ list})) (f : \beta \rightarrow \alpha \text{ list}) = \text{LIST\_BIND } l \ (\text{flip } (\text{LIST\_BIND} : \beta \text{ list} \rightarrow (\beta \rightarrow \alpha \text{ list}) \rightarrow \alpha \text{ list}) \ f \circ g)$           |
| $\forall (l : \text{bool list}). \text{AND\_EL } l \Leftrightarrow \text{FOLDER } \$ \setminus \ T \ l$                                                                                                                                                                                                                                                |
| $(x : \alpha \text{ list}) \leq ([]) : \alpha \text{ list} \Leftrightarrow x = ([]) : \alpha \text{ list}$                                                                                                                                                                                                                                             |
| $\forall (m : \text{num}) (n : \text{num}). m \in \text{count } n \Leftrightarrow m < n$                                                                                                                                                                                                                                                               |
| $\forall (l : \alpha \text{ list}) (i : \text{num}). \text{MAP } (f : \alpha \rightarrow \beta) (\text{DROP } i \ l) = \text{DROP } i \ (\text{MAP } f \ l)$                                                                                                                                                                                           |
| $\forall (s1 : \alpha \rightarrow \text{bool}) (s2 : \alpha \rightarrow \text{bool}) (s3 : \alpha \rightarrow \text{bool}). s1 \subseteq s2 \text{ DIFF } s3 \Leftrightarrow s1 \subseteq s2 \wedge \text{DISJOINT } s1 \ s3$                                                                                                                          |
| $\forall (m : \text{num}) (n : \text{num}). \text{SUC } m = \text{SUC } n \Leftrightarrow m = n$                                                                                                                                                                                                                                                       |
| $\forall (R : \alpha \rightarrow \alpha \rightarrow \text{bool}). \text{transitive } R^+$                                                                                                                                                                                                                                                              |
| $\forall (n : \text{num}) (m : \text{num}) (l : \alpha \text{ list}). n + m \leq \text{LENGTH } l \Rightarrow \text{DROP } n \ (\text{DROP } m \ l) = \text{DROP } (n + m) \ l$                                                                                                                                                                        |
| $\forall (s : \alpha \rightarrow \text{bool}). s = (\emptyset : \alpha \rightarrow \text{bool}) \Leftrightarrow \text{DISJOINT } s \ s$                                                                                                                                                                                                                |
| $\forall (x : \alpha) (y : \beta). \{x\} \times \{y\} = \{(x,y)\}$                                                                                                                                                                                                                                                                                     |
| $(\forall (x : \alpha). (R : \alpha \rightarrow \alpha \rightarrow \text{bool}) \ x \ x) \Rightarrow \forall (x : \alpha \text{ option}). \text{OPTREL } R \ x \ x$                                                                                                                                                                                    |
| $(0 : \text{num}) \otimes (0 : \text{num}) = (0 : \text{num})$                                                                                                                                                                                                                                                                                         |
| $\forall (v : \text{unit}). v = ()$                                                                                                                                                                                                                                                                                                                    |
| $\forall (ss : \alpha + \beta). (\exists (x : \alpha). ss = (\text{INL } x : \alpha + \beta)) \vee \exists (y : \beta). ss = (\text{INR } y : \alpha + \beta)$                                                                                                                                                                                         |
| $\forall (R : \alpha \rightarrow \alpha \rightarrow \text{bool}). (\forall (P : \alpha \rightarrow \text{bool}). (\forall (x : \alpha). (\forall (y : \alpha). R \ y \ x \Rightarrow P \ y) \Rightarrow P \ x) \Rightarrow \forall (x : \alpha). P \ x) \Rightarrow \text{WF } R$                                                                      |
| $\forall (x : \alpha). \{x\} \text{ DELETE } x = (\emptyset : \alpha \rightarrow \text{bool})$                                                                                                                                                                                                                                                         |
| $\forall (s : \alpha \rightarrow \text{bool}). \text{INFINITE } s \Leftrightarrow \forall (t : \alpha \rightarrow \text{bool}). \text{FINITE } t \Rightarrow t \subseteq s \Rightarrow t \subset s$                                                                                                                                                    |
| $\forall (R : \alpha \rightarrow \alpha \rightarrow \text{bool}). \text{diamond } R \Rightarrow \text{diamond } (\text{RC } R)$                                                                                                                                                                                                                        |

|                                                                                                                                                                                                                                                                                                                                                                                                                                                                                                                                               |
|-----------------------------------------------------------------------------------------------------------------------------------------------------------------------------------------------------------------------------------------------------------------------------------------------------------------------------------------------------------------------------------------------------------------------------------------------------------------------------------------------------------------------------------------------|
| $\text{OPTION\_MCOMP } (g : \gamma \rightarrow \delta \text{ option}) \text{ (SOME } : \gamma \rightarrow \gamma \text{ option}) = g \wedge \text{OPTION\_MCOMP (SOME } : \beta \rightarrow \beta \text{ option) (f : } \alpha \rightarrow \beta \text{ option) = f}$                                                                                                                                                                                                                                                                         |
| $\forall (x : \alpha) (y : \beta). \text{SND } (x, y) = y$                                                                                                                                                                                                                                                                                                                                                                                                                                                                                    |
| $\forall (n : \text{num}) (l : \alpha \text{ list}). n \leq \text{LENGTH } l \Rightarrow \forall (x : \alpha). \text{TAKE } n (\text{SNOC } x l) = \text{TAKE } n l$                                                                                                                                                                                                                                                                                                                                                                          |
| $\forall (f : \alpha \rightarrow \beta) (s : \alpha \rightarrow \text{bool}) (t : \beta \rightarrow \text{bool}) (s0 : \alpha \rightarrow \text{bool}) (t0 : \beta \rightarrow \text{bool}). \text{INJ } f s t \wedge s0 \subseteq s \wedge t \subseteq t0 \Rightarrow \text{INJ } f s0 t0$                                                                                                                                                                                                                                                   |
| $\forall (n : \text{num}) (x : \alpha). \text{REPLICATE } n x = \text{GENLIST } (K x : \text{num} \rightarrow \alpha) n$                                                                                                                                                                                                                                                                                                                                                                                                                      |
| $(\$ = : \beta \rightarrow \beta \rightarrow \text{bool}) \circ_r (R : \alpha \rightarrow \beta \rightarrow \text{bool}) = R$                                                                                                                                                                                                                                                                                                                                                                                                                 |
| $\forall (R : \alpha \rightarrow \alpha \rightarrow \text{bool}). \text{transitive } R \Rightarrow \text{transitive } (RC R)$                                                                                                                                                                                                                                                                                                                                                                                                                 |
| $\forall (t : \text{bool}). t \Rightarrow t \Leftrightarrow T$                                                                                                                                                                                                                                                                                                                                                                                                                                                                                |
| $\forall (v : \alpha) (v' : \alpha) (\text{rows} : (\alpha \rightarrow \beta \text{ option}) \text{ list}) (\text{rows}' : (\alpha \rightarrow \beta \text{ option}) \text{ list}) (r : \alpha \rightarrow \beta \text{ option}) (r' : \alpha \rightarrow \beta \text{ option}). v = v' \wedge r v' = r' v' \wedge \text{PMATCH } v' \text{ rows} = \text{PMATCH } v' \text{ rows}' \Rightarrow \text{PMATCH } v (r :: \text{rows}) = \text{PMATCH } v' (r' :: \text{rows}')$                                                                 |
| $((A : \alpha \rightarrow \text{bool}) \cap (B : \alpha \rightarrow \text{bool}) = A \Leftrightarrow A \subseteq B) \wedge (A \cap B = B \Leftrightarrow B \subseteq A)$                                                                                                                                                                                                                                                                                                                                                                      |
| $\text{LENGTH } (\text{STRONGEST\_REDUNDANT\_ROWS\_INFO } (v : \alpha) (\text{rows} : (\alpha \rightarrow \beta \text{ option}) \text{ list})) = \text{LENGTH } \text{rows}$                                                                                                                                                                                                                                                                                                                                                                  |
| $(R1 : \alpha \rightarrow \beta \rightarrow \text{bool}) \subseteq_r (R2 : \alpha \rightarrow \beta \rightarrow \text{bool}) \wedge (S1 : \gamma \rightarrow \alpha \rightarrow \text{bool}) \subseteq_r (S2 : \gamma \rightarrow \alpha \rightarrow \text{bool}) \Rightarrow R1 \circ_r S1 \subseteq_r R2 \circ_r S2$                                                                                                                                                                                                                        |
| $\forall (\text{opt1} : \alpha \text{ option}) (\text{opt2} : \alpha \text{ option}) (f1 : \alpha \rightarrow \beta) (f2 : \alpha \rightarrow \beta). \text{opt1} = \text{opt2} \wedge (\forall (x : \alpha). \text{opt2} = \text{SOME } x \Rightarrow f1 x = f2 x) \Rightarrow \text{OPTION\_MAP } f1 \text{ opt1} = \text{OPTION\_MAP } f2 \text{ opt2}$                                                                                                                                                                                    |
| $\forall (m : \text{num}) (n : \text{num}). m < n \Rightarrow m \neq n$                                                                                                                                                                                                                                                                                                                                                                                                                                                                       |
| $\forall (x : \alpha) (y : \alpha). (R : \alpha \rightarrow \alpha \rightarrow \text{bool})^{\circ*} x y \Rightarrow R^{\wedge} = x y$                                                                                                                                                                                                                                                                                                                                                                                                        |
| $\text{STRORD } (R : \alpha \rightarrow \alpha \rightarrow \text{bool}) = R \cap_r \text{RCOMPL } (\$ = : \alpha \rightarrow \alpha \rightarrow \text{bool})$                                                                                                                                                                                                                                                                                                                                                                                 |
| $\forall (x : \alpha) (s : \alpha \rightarrow \text{bool}). s \text{ DELETE } x \text{ DELETE } x = s \text{ DELETE } x$                                                                                                                                                                                                                                                                                                                                                                                                                      |
| $\forall (R : \alpha \rightarrow \alpha \rightarrow \text{bool}). \text{WeakOrder } R \Rightarrow RC (\text{STRORD } R) = R$                                                                                                                                                                                                                                                                                                                                                                                                                  |
| $\text{CARD } (\emptyset : \alpha \rightarrow \text{bool}) = (0 : \text{num})$                                                                                                                                                                                                                                                                                                                                                                                                                                                                |
| $\forall (m : \text{num}) (n : \text{num}). m = n \Rightarrow \neg(m < n)$                                                                                                                                                                                                                                                                                                                                                                                                                                                                    |
| $\forall (R1 : \alpha \rightarrow \alpha \rightarrow \text{bool}) (R2 : \alpha \rightarrow \alpha \rightarrow \text{bool}). \text{irreflexive } R2 \wedge R1 \subseteq_r R2 \Rightarrow \text{irreflexive } R1$                                                                                                                                                                                                                                                                                                                               |
| $\forall (s : \alpha \rightarrow \text{bool}) (x : \alpha). x \in s \Rightarrow (s \text{ DELETE } x = (\emptyset : \alpha \rightarrow \text{bool})) \Leftrightarrow s = \{x\}$                                                                                                                                                                                                                                                                                                                                                               |
| $\forall (n : \text{num}) (m : \text{num}) (l : \alpha \text{ list}). \text{DROP } n (\text{DROP } m l) = \text{DROP } (n + m) l$                                                                                                                                                                                                                                                                                                                                                                                                             |
| $\forall (\text{opt} : \alpha \text{ option}) (\text{opt}' : \alpha \text{ option}) (P : \alpha \rightarrow \text{bool}) (P' : \alpha \rightarrow \text{bool}). \text{opt} = \text{opt}' \wedge (\forall (x : \alpha). \text{opt}' = \text{SOME } x \Rightarrow (P x \Leftrightarrow P' x)) \Rightarrow (\text{OPTION\_ALL } P \text{ opt} \Leftrightarrow \text{OPTION\_ALL } P' \text{ opt}')$                                                                                                                                              |
| $\mathbb{U}(:\text{bool}) = \{T; F\}$                                                                                                                                                                                                                                                                                                                                                                                                                                                                                                         |
| $((A : \alpha \rightarrow \text{bool}) \cup (B : \alpha \rightarrow \text{bool})) \cap A = A \wedge (B \cup A) \cap A = A \wedge A \cap (A \cup B) = A \wedge A \cap (B \cup A) = A$                                                                                                                                                                                                                                                                                                                                                          |
| $\forall (f' : \alpha \rightarrow \beta \rightarrow \gamma) (f : \alpha \rightarrow \beta \rightarrow \gamma) (M' : \alpha \# \beta) (M : \alpha \# \beta). M = M' \wedge (\forall (x : \alpha) (y : \beta). M' = (x, y) \Rightarrow f x y = f' x y) \Rightarrow \text{UNCURRY } f M = \text{UNCURRY } f' M'$                                                                                                                                                                                                                                 |
| $\forall (v : \alpha) (\text{rows1a} : (\alpha \rightarrow \beta \text{ option}) \text{ list}) (\text{rows1b} : (\alpha \rightarrow \beta \text{ option}) \text{ list}) (\text{rows2a} : (\alpha \rightarrow \beta \text{ option}) \text{ list}) (\text{rows2b} : (\alpha \rightarrow \beta \text{ option}) \text{ list}). \text{PMATCH\_EQUIV\_ROWS } v \text{ rows1a rows1b} \Rightarrow \text{PMATCH\_EQUIV\_ROWS } v \text{ rows2a rows2b} \Rightarrow \text{PMATCH\_EQUIV\_ROWS } v (\text{rows1a ++ rows2a}) (\text{rows1b ++ rows2b})$ |
| $\forall (t : \text{bool}). t \vee T \Leftrightarrow T$                                                                                                                                                                                                                                                                                                                                                                                                                                                                                       |
| $\forall (x : \alpha) (y : \alpha) (s : \alpha \rightarrow \text{bool}). (x \text{ INSERT } s) \text{ DELETE } y = \text{if } x = y \text{ then } s \text{ DELETE } y \text{ else } x \text{ INSERT } s \text{ DELETE } y$                                                                                                                                                                                                                                                                                                                    |

|                                                                                                                                                                                                                                                                                                                                                                                                                                             |
|---------------------------------------------------------------------------------------------------------------------------------------------------------------------------------------------------------------------------------------------------------------------------------------------------------------------------------------------------------------------------------------------------------------------------------------------|
| $\forall(R : \alpha \rightarrow \alpha \rightarrow \text{bool}) (Q : \alpha \rightarrow \text{bool}) (b : \alpha). Q\ b \wedge (\forall(x : \alpha) (y : \alpha). R\ x\ y \wedge Q\ y \Rightarrow Q\ x) \Rightarrow \forall(x : \alpha). R^* x\ b \Rightarrow Q\ x$                                                                                                                                                                         |
| $\forall(a : \alpha \text{ list}) (b : \beta \text{ list}) (c : \alpha \text{ list}) (d : \beta \text{ list}). \text{LENGTH } a = \text{LENGTH } b \wedge \text{LENGTH } c = \text{LENGTH } d \Rightarrow \text{ZIP } (a,b) ++ \text{ZIP } (c,d) = \text{ZIP } (a ++ c, b ++ d)$                                                                                                                                                            |
| $\forall(x : \alpha) (f : \alpha \rightarrow \text{num} \rightarrow \alpha). (\forall(n : \text{num}). \text{PRIM\_REC\_FUN } x\ f\ (0 : \text{num})\ n = x) \wedge \forall(m : \text{num}) (n : \text{num}). \text{PRIM\_REC\_FUN } x\ f\ (\text{SUC } m)\ n = f\ (\text{PRIM\_REC\_FUN } x\ f\ m\ (\text{PRE } n))\ n$                                                                                                                    |
| $(\forall(s : \alpha). (P : \alpha \rightarrow \text{bool})\ s \Leftrightarrow (Q : \alpha \rightarrow \text{bool})\ s) \Rightarrow ((\forall(s : \alpha). P\ s) \Leftrightarrow \forall(s : \alpha). Q\ s)$                                                                                                                                                                                                                                |
| $\forall(x : \alpha \rightarrow \text{bool}) (y : \alpha \rightarrow \text{bool}) (z : \alpha \rightarrow \text{bool}). x\ \text{DIFF } (y \cup z) = x\ \text{DIFF } y\ \text{DIFF } z$                                                                                                                                                                                                                                                     |
| $(\text{OLEAST}(n : \text{num}). n = (x : \text{num})) = \text{SOME } x \wedge (\text{OLEAST}(n : \text{num}). x = n) = \text{SOME } x \wedge (\text{OLEAST}(n : \text{num}). F) = (\text{NONE} : \text{num option}) \wedge (\text{OLEAST}(n : \text{num}). T) = \text{SOME } (0 : \text{num})$                                                                                                                                             |
| $\forall(n : \text{num}). \neg(n < n)$                                                                                                                                                                                                                                                                                                                                                                                                      |
| $\forall(P : \alpha \rightarrow \text{bool}) (l : \alpha \text{ list}). \text{LENGTH } (\text{FILTER } P\ l) \leq \text{LENGTH } l$                                                                                                                                                                                                                                                                                                         |
| $\forall(P : \text{num} \rightarrow \text{bool}) (n : \text{num}). \text{EVERY } P\ (\text{COUNT\_LIST } n) \Leftrightarrow \forall(m : \text{num}). m < n \Rightarrow P\ m$                                                                                                                                                                                                                                                                |
| $\forall(m : \text{num}) (n : \text{num}). \text{count } n\ m \Leftrightarrow m < n$                                                                                                                                                                                                                                                                                                                                                        |
| $(\forall(P : \alpha \rightarrow \text{bool}). \text{PREFIX } P\ ([ ] : \alpha \text{ list}) = ([ ] : \alpha \text{ list})) \wedge \forall(P : \beta \rightarrow \text{bool}) (x : \beta) (l : \beta \text{ list}). \text{PREFIX } P\ (x::l) = \text{if } P\ x\ \text{then } x::\text{PREFIX } P\ l\ \text{else } ([ ] : \beta \text{ list})$                                                                                               |
| $(\forall(x : \alpha). \text{LAST } [x] = x) \wedge \forall(x : \alpha) (y : \alpha) (z : \alpha \text{ list}). \text{LAST } (x::y::z) = \text{LAST } (y::z)$                                                                                                                                                                                                                                                                               |
| $\forall(n : \text{num}) (l : \alpha \text{ list}). n < \text{LENGTH } l \Rightarrow \text{ELL } n\ l = \text{EL } (\text{PRE } (\text{LENGTH } l - n))\ l$                                                                                                                                                                                                                                                                                 |
| $\forall(x : \alpha). \text{DISJOINT } \{x\}\ (\emptyset : \alpha \rightarrow \text{bool})$                                                                                                                                                                                                                                                                                                                                                 |
| $\forall(n : \text{num}) (l : \alpha \text{ list}). n \leq \text{LENGTH } l \Rightarrow \text{LENGTH } (\text{BUTLASTN } n\ l) = \text{LENGTH } l - n$                                                                                                                                                                                                                                                                                      |
| $(\forall(x : \alpha). (P : \alpha \rightarrow \text{bool})\ x \Rightarrow (P' : \alpha \rightarrow \text{bool})\ x) \wedge (\forall(y : \beta). (Q : \beta \rightarrow \text{bool})\ y \Rightarrow (Q' : \beta \rightarrow \text{bool})\ y) \Rightarrow \text{PROD\_ALL } P\ Q\ (p : \alpha \# \beta) \Rightarrow \text{PROD\_ALL } P'\ Q'\ p$                                                                                             |
| $\forall(l1 : \alpha \text{ list}) (l2 : \alpha \text{ list}) (l3 : \alpha \text{ list}). \text{IS\_SUFFIX } l1\ l2 \wedge \text{IS\_SUFFIX } l2\ l3 \Rightarrow \text{IS\_SUFFIX } l1\ l3$                                                                                                                                                                                                                                                 |
| $\text{DATATYPE } ((\text{pair} : (\alpha \rightarrow \beta \rightarrow \alpha \# \beta) \rightarrow \gamma) (\$, : \alpha \rightarrow \beta \rightarrow \alpha \# \beta))$                                                                                                                                                                                                                                                                 |
| $\text{INJ } (\text{LINV\_OPT } (f : \beta \rightarrow \alpha) (s : \beta \rightarrow \text{bool})) (\text{IMAGE } f\ s) (\text{IMAGE } (\text{SOME } : \beta \rightarrow \beta \text{ option})\ s)$                                                                                                                                                                                                                                        |
| $\forall(s : \alpha \rightarrow \text{bool}) (t : \alpha \rightarrow \text{bool}). \text{countable } s \vee \text{countable } t \Rightarrow \text{countable } (s \cap t)$                                                                                                                                                                                                                                                                   |
| $\forall(f : \alpha \rightarrow \beta) (s : \alpha \rightarrow \text{bool}) (u : \alpha \rightarrow \text{bool}) (t : \beta \rightarrow \text{bool}). s \subseteq u \wedge \text{IMAGE } f\ u \subseteq t \Rightarrow \text{IMAGE } f\ s \subseteq t$                                                                                                                                                                                       |
| $\forall(R : \alpha \rightarrow \alpha \rightarrow \text{bool}). \text{transitive } R^*$                                                                                                                                                                                                                                                                                                                                                    |
| $\forall(X : \alpha \rightarrow \text{bool}) (Y : \alpha \rightarrow \text{bool}) (P : (\alpha \rightarrow \text{bool}) \rightarrow \text{bool}). Y \in P \wedge \text{DISJOINT } Y\ X \Rightarrow \text{DISJOINT } X\ (\text{BIGINTER } P) \wedge \text{DISJOINT } (\text{BIGINTER } P)\ X$                                                                                                                                                |
| $(0 : \text{num}) = \text{LENGTH } (l : \alpha \text{ list}) \Leftrightarrow l = ([ ] : \alpha \text{ list})$                                                                                                                                                                                                                                                                                                                               |
| $(\text{option\_CASE } (x : \alpha \text{ option}) (e : \beta) (f : \alpha \rightarrow \beta) : \beta) = \text{if } \text{IS\_SOME } x\ \text{then } f\ (\text{THE } x)\ \text{else } e$                                                                                                                                                                                                                                                    |
| $\forall(s : \alpha \rightarrow \text{bool}). \text{DISJOINT } s\ s \Leftrightarrow s = (\emptyset : \alpha \rightarrow \text{bool})$                                                                                                                                                                                                                                                                                                       |
| $\forall(R : \alpha \rightarrow \alpha \rightarrow \text{bool}) (a : \alpha) (b : \alpha). R^* a\ b \Leftrightarrow \forall(Q : \alpha \rightarrow \text{bool}). Q\ a \wedge (\forall(y : \alpha) (z : \alpha). Q\ y \wedge R\ y\ z \Rightarrow Q\ z) \Rightarrow Q\ b$                                                                                                                                                                     |
| $\forall(R : \alpha \rightarrow \alpha \rightarrow \text{bool}) (x : \alpha) (y : \alpha). \text{RC } R\ x\ y \Rightarrow R^* x\ y$                                                                                                                                                                                                                                                                                                         |
| $\forall(m : \text{num}) (n : \text{num}). m < n \Rightarrow m < \text{SUC } n$                                                                                                                                                                                                                                                                                                                                                             |
| $\text{BIGINTER } (\emptyset : (\alpha \rightarrow \text{bool}) \rightarrow \text{bool}) = \mathbb{U}(:\alpha)$                                                                                                                                                                                                                                                                                                                             |
| $(\neg(A : \text{bool}) \Rightarrow F) \Rightarrow (A \Rightarrow F) \Rightarrow F$                                                                                                                                                                                                                                                                                                                                                         |
| $\forall(f : \alpha \rightarrow \beta \# \gamma) (a : \beta \rightarrow \text{bool}) (b : \gamma \rightarrow \text{bool}). \text{PREIMAGE } f\ (a \times b) = \text{PREIMAGE } ((\text{FST} : \beta \# \gamma \rightarrow \beta) \circ f)\ a \cap \text{PREIMAGE } ((\text{SND} : \beta \# \gamma \rightarrow \gamma) \circ f)\ b$                                                                                                          |
| $\forall(f : \alpha \rightarrow \beta) (x : \alpha \text{ option}). \text{OPTION\_MAP } f\ x = (\text{NONE} : \beta \text{ option}) \Leftrightarrow x = (\text{NONE} : \alpha \text{ option})$                                                                                                                                                                                                                                              |
| $\forall(f : \alpha \rightarrow \beta) (s : \alpha \rightarrow \text{bool}) (t : \beta \rightarrow \text{bool}). \text{BIJ } f\ s\ t \Leftrightarrow (\forall(x : \alpha). x \in s \Rightarrow f\ x \in t) \wedge \exists(g : \beta \rightarrow \alpha). (\forall(x : \beta). x \in t \Rightarrow g\ x \in s) \wedge (\forall(x : \alpha). x \in s \Rightarrow g\ (f\ x) = x) \wedge \forall(x : \beta). x \in t \Rightarrow f\ (g\ x) = x$ |

|                                                                                                                                                                                                                                                                                                                                                                                                                                                                |
|----------------------------------------------------------------------------------------------------------------------------------------------------------------------------------------------------------------------------------------------------------------------------------------------------------------------------------------------------------------------------------------------------------------------------------------------------------------|
| $\forall(l1 : \alpha \text{ list}) (l2 : \alpha \text{ list}) (n : \text{num}) (x : \alpha). n < \text{LENGTH } l1 \Rightarrow \text{LUPDATE } x \ n \ (l1 ++ l2) = \text{LUPDATE } x \ n \ l1 ++ l2$                                                                                                                                                                                                                                                          |
| $(\text{some}(x : \alpha). x = (y : \alpha)) = \text{SOME } y \wedge (\text{some}(x : \alpha). y = x) = \text{SOME } y$                                                                                                                                                                                                                                                                                                                                        |
| $(\forall(x : \alpha). \text{FRONT } [x] = ([] : \alpha \text{ list})) \wedge \forall(x : \alpha) (y : \alpha) (z : \alpha \text{ list}). \text{FRONT } (x::y::z) = x::\text{FRONT } (y::z)$                                                                                                                                                                                                                                                                   |
| $\text{ZRECSPACE } (\text{ind\_type}\$ZBOT : \text{num} \rightarrow \alpha \rightarrow \text{bool}) \wedge \forall(c : \text{num}) (i : \alpha) (r : \text{num} \rightarrow \text{num} \rightarrow \alpha \rightarrow \text{bool}). (\forall(n : \text{num}). \text{ZRECSPACE } (r \ n)) \Rightarrow \text{ZRECSPACE } (\text{ind\_type}\$ZCONST \ c \ i \ r)$                                                                                                 |
| $\forall(m : \text{num}) (n : \text{num}). \text{MEM } m \ (\text{COUNT\_LIST } n) \Leftrightarrow m < n$                                                                                                                                                                                                                                                                                                                                                      |
| $\forall(P : \alpha \rightarrow \beta \rightarrow \text{bool}). (\forall(x : \alpha) (y : \beta). P \ x \ y) \Leftrightarrow \forall((x : \alpha), (y : \beta)). P \ x \ y$                                                                                                                                                                                                                                                                                    |
| $\forall(P : \alpha \rightarrow \text{bool}) (x : \alpha). x \in P \Leftrightarrow P \ x$                                                                                                                                                                                                                                                                                                                                                                      |
| $\text{BIGINTER } (B : (\alpha \rightarrow \text{bool}) \rightarrow \text{bool}) (x : \alpha) \Leftrightarrow \forall(P : \alpha \rightarrow \text{bool}). P \in B \Rightarrow x \in P$                                                                                                                                                                                                                                                                        |
| $\text{LIST\_REL } (P : \alpha \rightarrow \beta \rightarrow \text{bool}) (\text{GENLIST } (f : \text{num} \rightarrow \alpha) (l : \text{num})) (\text{GENLIST } (g : \text{num} \rightarrow \beta) l) \Leftrightarrow \forall(i : \text{num}). i < l \Rightarrow P \ (f \ i) \ (g \ i)$                                                                                                                                                                      |
| $\forall(f : \alpha \rightarrow \beta) (s : \alpha \rightarrow \text{bool}) (t : \beta \rightarrow \text{bool}). \text{SURJ } f \ s \ t \Leftrightarrow \text{IMAGE } f \ s = t$                                                                                                                                                                                                                                                                               |
| $\forall(f : \alpha \rightarrow \beta) (g : \text{num} \rightarrow \alpha) (n : \text{num}). \text{MAP } f \ (\text{GENLIST } g \ n) = \text{GENLIST } (f \circ g) \ n$                                                                                                                                                                                                                                                                                        |
| $\forall(f : \alpha \rightarrow \beta) (l : \alpha \text{ list}) (a : \alpha). \text{MEM } a \ l \Rightarrow \text{MEM } (f \ a) \ (\text{MAP } f \ l)$                                                                                                                                                                                                                                                                                                        |
| $\text{BIGUNION } (\text{IMAGE } (f : \beta \rightarrow \alpha \rightarrow \text{bool}) (\text{set } (ls : \beta \text{ list}))) \subseteq (s : \alpha \rightarrow \text{bool}) \Leftrightarrow \forall(x : \beta). \text{MEM } x \ ls \Rightarrow f \ x \subseteq s$                                                                                                                                                                                          |
| $\forall(s : \alpha \rightarrow \text{bool}) (t : \alpha \rightarrow \text{bool}). t \subseteq s \Rightarrow s \ \text{DIFF } (s \ \text{DIFF } t) = t$                                                                                                                                                                                                                                                                                                        |
| $\forall(\text{set} : \alpha \rightarrow \text{bool}) (e : \alpha \rightarrow \text{bool}). e \in \text{POW } \text{set} \Leftrightarrow e \subseteq \text{set}$                                                                                                                                                                                                                                                                                               |
| $\text{FINITE } \mathbb{U}(:\alpha \# \beta) \Leftrightarrow \text{FINITE } \mathbb{U}(:\alpha) \wedge \text{FINITE } \mathbb{U}(:\beta)$                                                                                                                                                                                                                                                                                                                      |
| $\forall(f : \alpha \rightarrow \beta) (s : \alpha \rightarrow \text{bool}) (t : \beta \rightarrow \text{bool}). \text{FINITE } s \wedge \text{BIJ } f \ s \ t \Rightarrow \text{CARD } s = \text{CARD } t$                                                                                                                                                                                                                                                    |
| $\{x \mid T\} = \mathbb{U}(:\alpha)$                                                                                                                                                                                                                                                                                                                                                                                                                           |
| $\text{COMPL } (\emptyset : \alpha \rightarrow \text{bool}) = \mathbb{U}(:\alpha)$                                                                                                                                                                                                                                                                                                                                                                             |
| $\forall(s : \alpha \rightarrow \text{bool}) (t : \alpha \rightarrow \text{bool}). s = t \Leftrightarrow \forall(x : \alpha). x \in s \Leftrightarrow x \in t$                                                                                                                                                                                                                                                                                                 |
| $\forall(s : \alpha \rightarrow \text{bool}). (\exists(f : \text{num} \rightarrow \alpha). \text{BIJ } f \ \mathbb{U}(:\text{num}) \ s) \Rightarrow \text{countable } s$                                                                                                                                                                                                                                                                                       |
| $\forall(a0 : \alpha) (a1 : \alpha \text{ list}) (a0' : \alpha) (a1' : \alpha \text{ list}). a0::a1 = a0'::a1' \Leftrightarrow a0 = a0' \wedge a1 = a1'$                                                                                                                                                                                                                                                                                                       |
| $\forall(s1 : (\alpha \rightarrow \text{bool}) \rightarrow \text{bool}) (s2 : (\alpha \rightarrow \text{bool}) \rightarrow \text{bool}). \text{BIGINTER } (s1 \cup s2) = \text{BIGINTER } s1 \cap \text{BIGINTER } s2$                                                                                                                                                                                                                                         |
| $\forall(f : \alpha \rightarrow \beta \rightarrow \text{bool}) (s : \gamma \rightarrow \text{bool}) (t : \alpha \rightarrow \text{bool}). s \times \text{BIGUNION } (\text{IMAGE } f \ t) = \text{BIGUNION } (\text{IMAGE } (\lambda(n : \alpha). s \times f \ n) \ t)$                                                                                                                                                                                        |
| $\text{PMATCH\_EQUIV\_ROWS } (v : \alpha) (\text{rows1} : (\alpha \rightarrow \beta \text{ option}) \text{ list}) (\text{rows2} : (\alpha \rightarrow \beta \text{ option}) \text{ list}) \Rightarrow \text{PMATCH } v \ \text{rows1} = \text{PMATCH } v \ \text{rows2}$                                                                                                                                                                                       |
| $\forall(l : \alpha \text{ list}) (x : \alpha). \text{SEG } (1 : \text{num}) \ (\text{LENGTH } l) \ (\text{SNOC } x \ l) = [x]$                                                                                                                                                                                                                                                                                                                                |
| $\forall(s : \alpha \rightarrow \text{bool}). \text{FINITE } s \Rightarrow \text{countable } s$                                                                                                                                                                                                                                                                                                                                                                |
| $\forall(l : \alpha \text{ list}). \text{FINITE } (\text{set } l)$                                                                                                                                                                                                                                                                                                                                                                                             |
| $\forall(f : \alpha \rightarrow \text{num}) (x : \alpha) (ls : \alpha \text{ list}). \text{MEM } x \ ls \Rightarrow f \ x \leq \text{SUM } (\text{MAP } f \ ls)$                                                                                                                                                                                                                                                                                               |
| $\forall(x : \alpha) (s : \alpha \rightarrow \text{bool}). x \in x \ \text{INSERT } s$                                                                                                                                                                                                                                                                                                                                                                         |
| $\forall(n : \text{num}) (l : \alpha \text{ list}). n < \text{LENGTH } l \Rightarrow \text{BUTLASTN } n \ (\text{FRONT } l) = \text{FRONT } (\text{BUTLASTN } n \ l)$                                                                                                                                                                                                                                                                                          |
| $\forall(v : \alpha) (p : \beta \rightarrow \alpha) (g : \beta \rightarrow \text{bool}) (p' : \gamma \rightarrow \alpha) (g' : \gamma \rightarrow \text{bool}) (\text{RES} : \text{bool}). \text{PMATCH\_ROW\_COND\_EX } v \ p \ g \Rightarrow (\forall(x : \beta). g \ x \Rightarrow ((\exists(x' : \gamma). p' \ x' = p \ x \wedge g' \ x') \Leftrightarrow \text{RES})) \Rightarrow (\text{PMATCH\_ROW\_COND\_EX } v \ p' \ g' \Leftrightarrow \text{RES})$ |
| $\forall(x : \alpha). (\emptyset : \alpha \rightarrow \text{bool}) \ \text{DELETE } x = (\emptyset : \alpha \rightarrow \text{bool})$                                                                                                                                                                                                                                                                                                                          |
| $\forall(s : \alpha \rightarrow \text{bool}) (t : \alpha \rightarrow \text{bool}). s \ \text{DIFF } t \cap s = s \ \text{DIFF } t$                                                                                                                                                                                                                                                                                                                             |



|                                                                                                                                                                                                                                                                                                                                                                                                                                                                                                                                                                                                                                   |
|-----------------------------------------------------------------------------------------------------------------------------------------------------------------------------------------------------------------------------------------------------------------------------------------------------------------------------------------------------------------------------------------------------------------------------------------------------------------------------------------------------------------------------------------------------------------------------------------------------------------------------------|
| $\forall (n : \text{num}) (l1 : \alpha \text{ list}) (l2 : \alpha \text{ list}). \text{TAKE } n (l1 ++ l2) = \text{TAKE } n l1 ++ \text{TAKE } (n - \text{LENGTH } l1) l2$                                                                                                                                                                                                                                                                                                                                                                                                                                                        |
| $\forall (s : \alpha \rightarrow \text{bool}) (t : \alpha \rightarrow \text{bool}) (u : \alpha \rightarrow \text{bool}). s \cap (t \cap u) = s \cap t \cap u$                                                                                                                                                                                                                                                                                                                                                                                                                                                                     |
| $\forall (P : \alpha \text{ list} \rightarrow \text{bool}). (\forall (l : \alpha \text{ list}). \text{LENGTH } l = (0 : \text{num}) \Rightarrow P l) \Leftrightarrow P ([]) : \alpha \text{ list}$                                                                                                                                                                                                                                                                                                                                                                                                                                |
| $\text{ASSOC } (\$++ : \alpha \text{ list} \rightarrow \alpha \text{ list} \rightarrow \alpha \text{ list})$                                                                                                                                                                                                                                                                                                                                                                                                                                                                                                                      |
| $\text{PMATCH\_ROW\_REDUNDANT } (v : \alpha) (l : (\alpha \rightarrow \beta \text{ option}) \text{ list}) (i : \text{num}) \Leftrightarrow F$                                                                                                                                                                                                                                                                                                                                                                                                                                                                                     |
| $\forall (\text{ZRECSpace}' : (\text{num} \rightarrow \alpha \rightarrow \text{bool}) \rightarrow \text{bool}). \text{ZRECSpace}' (\text{ind\_type}\$ZBOT : \text{num} \rightarrow \alpha \rightarrow \text{bool})$<br>$\wedge (\forall (c : \text{num}) (i : \alpha) (r : \text{num} \rightarrow \text{num} \rightarrow \alpha \rightarrow \text{bool}). (\forall (n : \text{num}). \text{ZRECSpace}' (r n)) \Rightarrow$<br>$\text{ZRECSpace}' (\text{ind\_type}\$ZCONSTR c i r)) \Rightarrow \forall (a0 : \text{num} \rightarrow \alpha \rightarrow \text{bool}). \text{ZRECSpace } a0 \Rightarrow$<br>$\text{ZRECSpace}' a0$ |
| $\forall (l1 : \alpha \text{ list}) (l2 : \beta \text{ list}). \text{LENGTH } l1 = \text{LENGTH } l2 \Rightarrow \forall (x1 : \alpha) (x2 : \beta). \text{ZIP } (\text{SNOC } x1 l1, \text{SNOC } x2 l2) = \text{SNOC } (x1, x2) (\text{ZIP } (l1, l2))$                                                                                                                                                                                                                                                                                                                                                                         |
| $\neg \text{SHORTLEX } (R : \alpha \rightarrow \alpha \rightarrow \text{bool}) (l : \alpha \text{ list}) (l' : \alpha \text{ list})$                                                                                                                                                                                                                                                                                                                                                                                                                                                                                              |
| $\forall (e : \alpha). \exists (fn : \text{unit} \rightarrow \alpha). fn () = e$                                                                                                                                                                                                                                                                                                                                                                                                                                                                                                                                                  |
| $\forall (l : \alpha \text{ list}). l \neq ([]) : \alpha \text{ list} \Rightarrow \text{FRONT } l ++ [\text{LAST } l] = l$                                                                                                                                                                                                                                                                                                                                                                                                                                                                                                        |
| $\forall (l : \alpha \text{ list}) (n : \text{num}). n < \text{LENGTH } l \Rightarrow \text{LAST } (\text{DROP } n l) = \text{LAST } l$                                                                                                                                                                                                                                                                                                                                                                                                                                                                                           |
| $\forall (n : \text{num}) (l : \alpha \text{ list}). n \leq \text{LENGTH } l \Rightarrow \forall (x : \alpha). \text{BUTLASTN } n (x :: l) = x :: \text{BUTLASTN } n l$                                                                                                                                                                                                                                                                                                                                                                                                                                                           |
| $\forall (f : \alpha \rightarrow \beta) (s : \beta \rightarrow \text{bool}) (t : \beta \rightarrow \text{bool}). \text{DISJOINT } s t \Rightarrow \text{DISJOINT } (\text{PREIMAGE } f s) (\text{PREIMAGE } f t)$                                                                                                                                                                                                                                                                                                                                                                                                                 |
| $(\exists (ls : \alpha \text{ list}). (P : \alpha \text{ list} \rightarrow \text{bool}) ls) \Leftrightarrow \exists (n : \text{num}) (f : \text{num} \rightarrow \alpha). P (\text{GENLIST } f n)$                                                                                                                                                                                                                                                                                                                                                                                                                                |
| $\text{nub } (l : \alpha \text{ list}) = (l : \alpha \text{ list})$                                                                                                                                                                                                                                                                                                                                                                                                                                                                                                                                                               |
| $\text{WF } (R : \alpha \rightarrow \alpha \rightarrow \text{bool})^+ \Leftrightarrow \text{WF } R$                                                                                                                                                                                                                                                                                                                                                                                                                                                                                                                               |
| $\forall (n : \text{num}). \text{countable } (\text{count } n)$                                                                                                                                                                                                                                                                                                                                                                                                                                                                                                                                                                   |
| $\{x \mid (y : \alpha) = x\} = \{y\}$                                                                                                                                                                                                                                                                                                                                                                                                                                                                                                                                                                                             |
| $\forall (x : \alpha) (l : \alpha \text{ list}). \text{SNOC } x l = l ++ [x]$                                                                                                                                                                                                                                                                                                                                                                                                                                                                                                                                                     |
| $\forall (s : \alpha \rightarrow \text{bool}) (t : \alpha \rightarrow \text{bool}). \text{DISJOINT } s t \Leftrightarrow \forall (x : \alpha). x \in s \Rightarrow x \notin t$                                                                                                                                                                                                                                                                                                                                                                                                                                                    |
| $\text{GENLIST } (f : \text{num} \rightarrow \alpha) (0 : \text{num}) = (l : \alpha \text{ list}) \wedge \text{GENLIST } f (\text{NUMERAL } (n : \text{num})) =$<br>$\text{GENLIST\_AUX } f (\text{NUMERAL } n) (l : \alpha \text{ list})$                                                                                                                                                                                                                                                                                                                                                                                        |
| $\forall (s : \alpha) (x : \alpha \rightarrow \text{bool}). x \subset \{s\} \Leftrightarrow x = (\emptyset : \alpha \rightarrow \text{bool})$                                                                                                                                                                                                                                                                                                                                                                                                                                                                                     |
| $\forall (R : \alpha \rightarrow \alpha \rightarrow \text{bool}). \text{symmetric } R^T \Leftrightarrow \text{symmetric } R$                                                                                                                                                                                                                                                                                                                                                                                                                                                                                                      |
| $\forall (t1 : \alpha) (t2 : \alpha). (\text{if } F \text{ then } t1 \text{ else } t2) = t2$                                                                                                                                                                                                                                                                                                                                                                                                                                                                                                                                      |
| $\forall (l1 : \alpha \text{ list}) (l2 : \alpha \text{ list}). \text{set } (l1 ++ l2) = \text{set } l1 \cup \text{set } l2$                                                                                                                                                                                                                                                                                                                                                                                                                                                                                                      |
| $\forall (l1 : \alpha \text{ list}) (l2 : \alpha \text{ list}). l2 \preceq l1 \Leftrightarrow \exists (l : \alpha \text{ list}). l1 = l2 ++ l$                                                                                                                                                                                                                                                                                                                                                                                                                                                                                    |
| $\forall (R : \alpha \rightarrow \alpha \rightarrow \text{bool}). \text{irreflexive } R^T \Leftrightarrow \text{irreflexive } R$                                                                                                                                                                                                                                                                                                                                                                                                                                                                                                  |
| $\forall (s : \alpha \rightarrow \text{bool}). \text{CHOICE } s \notin \text{REST } s$                                                                                                                                                                                                                                                                                                                                                                                                                                                                                                                                            |
| $\forall (l1 : \alpha \text{ list}) (l2 : \alpha \text{ list}). l1 ++ l2 = \text{FOLDL } (\lambda (l' : \alpha \text{ list}) (x : \alpha). \text{SNOC } x l') l1 l2$                                                                                                                                                                                                                                                                                                                                                                                                                                                              |
| $\forall (L : \alpha \text{ list}) (n : \text{num}). \text{LEN } L n = \text{LENGTH } L + n$                                                                                                                                                                                                                                                                                                                                                                                                                                                                                                                                      |
| $\forall (x : \text{bool}) (x' : \text{bool}) (y : \text{bool}) (y' : \text{bool}). (x \Rightarrow y' \Rightarrow y) \wedge (\neg y' \Rightarrow x \Rightarrow x') \Rightarrow (x' \Rightarrow y') \Rightarrow x \Rightarrow y$                                                                                                                                                                                                                                                                                                                                                                                                   |
| $\forall (P : \alpha \rightarrow \text{bool}) (l : \alpha \text{ list}). \text{EVERY } P l \Leftrightarrow \forall (e : \alpha). \text{MEM } e l \Rightarrow P e$                                                                                                                                                                                                                                                                                                                                                                                                                                                                 |
| $\forall (n1 : \text{num}) (n2 : \text{num}). \text{count } n1 = \text{count } n2 \Leftrightarrow n1 = n2$                                                                                                                                                                                                                                                                                                                                                                                                                                                                                                                        |
| $\forall (n : \text{num}). (0 : \text{num}) < n \Rightarrow \forall (x : \alpha) (l : \alpha \text{ list}). \text{EL } n (x :: l) = \text{EL } (\text{PRE } n) l$                                                                                                                                                                                                                                                                                                                                                                                                                                                                 |
| $\forall (e : \alpha) (l : \alpha \text{ list}). \text{LIST\_ELEM\_COUNT } e l > (0 : \text{num}) \Leftrightarrow \text{MEM } e l$                                                                                                                                                                                                                                                                                                                                                                                                                                                                                                |
| $\forall (t : \text{bool}). t \vee t \Leftrightarrow t$                                                                                                                                                                                                                                                                                                                                                                                                                                                                                                                                                                           |

|                                                                                                                                                                                                                                                                                                              |
|--------------------------------------------------------------------------------------------------------------------------------------------------------------------------------------------------------------------------------------------------------------------------------------------------------------|
| $(\forall(x:\alpha) (y:\alpha). (f:\alpha \rightarrow \beta) x = f y \Leftrightarrow x = y) \Rightarrow (\text{DISJOINT } (\text{IMAGE } f (s1:\alpha \rightarrow \text{bool})) (\text{IMAGE } f (s2:\alpha \rightarrow \text{bool})) \Leftrightarrow \text{DISJOINT } s1 s2)$                               |
| $\forall(x:\text{bool}) (x':\text{bool}) (y:\text{bool}) (y':\text{bool}). (y \Rightarrow x' \Rightarrow x) \wedge (x' \Rightarrow y' \Rightarrow y) \Rightarrow x' \wedge y' \Rightarrow x \wedge y$                                                                                                        |
| $\forall(n:\text{num}). \text{DROP } n ([]:\alpha \text{ list}) = ([]:\alpha \text{ list})$                                                                                                                                                                                                                  |
| $\forall(s:\alpha \rightarrow \text{bool}). s \subset \mathbb{U}(\alpha) \Leftrightarrow \exists(x:\alpha). x \notin s$                                                                                                                                                                                      |
| $(Q:\alpha \text{ option} \rightarrow \text{bool}) (\$some (P:\alpha \rightarrow \text{bool})) \Rightarrow (\exists(x:\alpha). P x \wedge Q (\text{SOME } x)) \vee (\forall(x:\alpha). \neg P x) \wedge Q (\text{NONE}:\alpha \text{ option})$                                                               |
| $\text{transitive } (\$SUBSET :(\alpha \rightarrow \text{bool}) \rightarrow (\alpha \rightarrow \text{bool}) \rightarrow \text{bool})$                                                                                                                                                                       |
| $\forall(f:\alpha \rightarrow \beta) (g:\beta \rightarrow \gamma) (s:\alpha \rightarrow \text{bool}) (t:\beta \rightarrow \text{bool}) (u:\gamma \rightarrow \text{bool}). \text{INJ } f s t \wedge \text{INJ } g t u \Rightarrow \text{INJ } (g \circ f) s u$                                               |
| $\forall(y:\beta) (s:\alpha \rightarrow \text{bool}) (f:\alpha \rightarrow \beta). \text{IMAGE } f s y \Leftrightarrow \exists(x:\alpha). y = f x \wedge x \in s$                                                                                                                                            |
| $\forall(f:\alpha \rightarrow \beta) (g:\beta \rightarrow \gamma) (s:\alpha \rightarrow \text{bool}) (t:\beta \rightarrow \text{bool}) (u:\gamma \rightarrow \text{bool}). \text{SURJ } f s t \wedge \text{SURJ } g t u \Rightarrow \text{SURJ } (g \circ f) s u$                                            |
| $\forall(f:'z \rightarrow 'z). \text{INVOL } f \Rightarrow \forall(a:'z) (b:'z). f a = f b \Leftrightarrow a = b$                                                                                                                                                                                            |
| $\forall(l1:\alpha \text{ list}) (l2:\alpha \text{ list}) (l3:\alpha \text{ list}). l1 ++ (l2 ++ l3) = l1 ++ l2 ++ l3$                                                                                                                                                                                       |
| $\$OLEAST (P:\text{num} \rightarrow \text{bool}) = (\text{NONE}:\text{num option}) \Leftrightarrow \forall(n:\text{num}). \neg P n$                                                                                                                                                                          |
| $\forall(n:\text{num}) (l1:\alpha \text{ list}) (l2:\alpha \text{ list}). \text{DROP } n (l1 ++ l2) = \text{DROP } n l1 ++ \text{DROP } (n - \text{LENGTH } l1) l2$                                                                                                                                          |
| $\forall(l s:\alpha \text{ list}) (f:\beta \rightarrow \alpha). \text{EVERY } (\lambda(x:\alpha). \exists(y:\beta). x = f y) l s \Rightarrow \exists(l:\beta \text{ list}). l s = \text{MAP } f l$                                                                                                           |
| $\forall(\text{opt}:\alpha \text{ option}). (\exists(x:\alpha). \text{opt} = \text{SOME } x) \vee \text{opt} = (\text{NONE}:\alpha \text{ option})$                                                                                                                                                          |
| $\text{SURJ } (f:\alpha \rightarrow \beta) (s:\alpha \rightarrow \text{bool}) (t:\beta \rightarrow \text{bool}) \Rightarrow \exists(g:\beta \rightarrow \alpha). \text{INJ } g t s \wedge \forall(y:\beta). y \in t \Rightarrow f (g y) = y$                                                                 |
| $\forall(R:\alpha \rightarrow \alpha \rightarrow \text{bool}) (x:\alpha) (y:\alpha) (z:\alpha). R^{\circ*} x y \wedge R y z \Rightarrow R^+ x z$                                                                                                                                                             |
| $\forall(f:\alpha \rightarrow \beta) (s:\alpha \rightarrow \text{bool}) (t:\beta \rightarrow \text{bool}). \text{INJ } f s t \wedge \text{INFINITE } s \Rightarrow \text{INFINITE } t$                                                                                                                       |
| $\forall(x1:\alpha) (l1:\alpha \text{ list}) (x2:\alpha) (l2:\alpha \text{ list}). \text{SNOC } x1 l1 = \text{SNOC } x2 l2 \Rightarrow \text{LENGTH } l1 = \text{LENGTH } l2$                                                                                                                                |
| $\forall(x:\alpha) (l:\alpha \text{ list}). \text{TL } (\text{SNOC } x l) = \text{if NULL } l \text{ then } ([]:\alpha \text{ list}) \text{ else } \text{SNOC } x (\text{TL } l)$                                                                                                                            |
| $\forall(P:\alpha \text{ list} \rightarrow \text{bool}) (n:\text{num}). (\forall(l:\alpha \text{ list}). \text{LENGTH } l = \text{SUC } n \Rightarrow P l) \Leftrightarrow \forall(l:\alpha \text{ list}). \text{LENGTH } l = n \Rightarrow (\lambda(l:\alpha \text{ list}). \forall(x:\alpha). P (x::l)) l$ |
| $(x:\alpha) \in \text{RDOM } (\text{RRESTRICT } (R:\alpha \rightarrow \beta \rightarrow \text{bool}) (s:\alpha \rightarrow \text{bool})) \Leftrightarrow x \in \text{RDOM } R \wedge x \in s$                                                                                                                |
| $\forall(x:\alpha) (l:\alpha \text{ list}). \text{FRONT } (\text{SNOC } x l) = l$                                                                                                                                                                                                                            |
| $\forall(l:\alpha \text{ list}) (x:\alpha). \text{MEM } x (\text{REVERSE } l) \Leftrightarrow \text{MEM } x l$                                                                                                                                                                                               |
| $\forall(l:\alpha \text{ list}). \text{NULL } l \Leftrightarrow \text{FOLDL } (\lambda(x:\text{bool}) (l':\alpha). F) T l$                                                                                                                                                                                   |
| $\forall(l:\alpha \text{ list}) (m:\text{num}) (x:\alpha). \text{MEM } x (\text{DROP } m l) \Rightarrow \text{MEM } x l$                                                                                                                                                                                     |
| $\forall(x:\alpha + \beta). \text{ISR } x \Rightarrow (\text{INR } (\text{OUTR } x) : \alpha + \beta) = x$                                                                                                                                                                                                   |
| $(([(f:\beta \rightarrow \alpha)] <^* (l:\beta \text{ list})) : \alpha \text{ list}) = \text{MAP } f l$                                                                                                                                                                                                      |
| $\forall(n:\text{num}) (x:\alpha). \text{SNOC } x (\text{REPLICATE } n x) = \text{REPLICATE } (\text{SUC } n) x$                                                                                                                                                                                             |
| $\forall(s:\alpha \rightarrow \text{bool}) (x:\alpha) (y:\alpha). x \text{ INSERT } s = \{y\} \Leftrightarrow x = y \wedge s \subseteq \{y\}$                                                                                                                                                                |
| $\forall(n:\text{num}) (l1:\alpha \text{ list}) (l2:\alpha \text{ list}). l1 \leq l2 \wedge n < \text{LENGTH } l1 \wedge n < \text{LENGTH } l2 \Rightarrow \text{EL } n l1 = \text{EL } n l2$                                                                                                                |
| $\forall(R:\alpha \rightarrow \alpha \rightarrow \text{bool}). \text{reflexive } (\text{RC } R)$                                                                                                                                                                                                             |
| $(R1:\gamma \rightarrow \beta \rightarrow \text{bool}) \circ_r (R2:\delta \rightarrow \gamma \rightarrow \text{bool}) \circ_r (R3:\alpha \rightarrow \delta \rightarrow \text{bool}) = (R1 \circ_r R2) \circ_r R3$                                                                                           |
| $\forall(n:\text{num}). (0:\text{num}) < n \Rightarrow \forall(x:\alpha) (l:\alpha \text{ list}). \text{ELL } n (\text{SNOC } x l) = \text{ELL } (\text{PRE } n) l$                                                                                                                                          |
| $\forall(l1:\alpha \text{ list}) (l2:\alpha \text{ list}). \text{ALL\_DISTINCT } (l1 ++ l2) \Leftrightarrow \text{ALL\_DISTINCT } l1 \wedge \text{ALL\_DISTINCT } l2 \wedge \forall(e:\alpha). \text{MEM } e l1 \Rightarrow \neg \text{MEM } e l2$                                                           |
| $\forall(l:\alpha \text{ list}). l \neq ([]:\alpha \text{ list}) \Rightarrow \text{BUTLASTN } (1:\text{num}) l = \text{FRONT } l$                                                                                                                                                                            |

|                                                                                                                                                                                                                                                                                                                                                                                                                                                                                                                                                                 |
|-----------------------------------------------------------------------------------------------------------------------------------------------------------------------------------------------------------------------------------------------------------------------------------------------------------------------------------------------------------------------------------------------------------------------------------------------------------------------------------------------------------------------------------------------------------------|
| $\forall (s : \alpha \rightarrow \text{bool}) (t : \alpha \rightarrow \text{bool}). \text{BIGUNION } \{s; t\} = s \cup t$                                                                                                                                                                                                                                                                                                                                                                                                                                       |
| $\forall (l2 : \alpha \text{ list}) (l1 : \alpha \text{ list}). \neg \text{NULL } l2 \Rightarrow \text{EL } (\text{LENGTH } l1) (l1 ++ l2) = \text{HD } l2$                                                                                                                                                                                                                                                                                                                                                                                                     |
| $\text{reflexive } ((R1 : \alpha \rightarrow \alpha \rightarrow \text{bool}) \text{ LEX } (R2 : \beta \rightarrow \beta \rightarrow \text{bool})) \Leftrightarrow \text{reflexive } R1 \vee \text{reflexive } R2$                                                                                                                                                                                                                                                                                                                                               |
| $\text{INJ } (f : \alpha \rightarrow \beta) (s : \alpha \rightarrow \text{bool}) (\text{IMAGE } f s) \Rightarrow (\text{countable } (\text{IMAGE } f s) \Leftrightarrow \text{countable } s)$                                                                                                                                                                                                                                                                                                                                                                   |
| $\text{MAP } (f : \beta \rightarrow \alpha) (\text{LIST\_BIND } (l : \gamma \text{ list}) (g : \gamma \rightarrow \beta \text{ list})) = \text{LIST\_BIND } l (\text{MAP } f \circ g)$                                                                                                                                                                                                                                                                                                                                                                          |
| $\text{FUNSET } \mathbb{U}(:\alpha) \mathbb{U}(:\beta) = \mathbb{U}(:\alpha \rightarrow \beta)$                                                                                                                                                                                                                                                                                                                                                                                                                                                                 |
| $\forall (A : \text{bool}) (B : \text{bool}) (C : \text{bool}). A \wedge B \Rightarrow C \Leftrightarrow A \Rightarrow B \Rightarrow C$                                                                                                                                                                                                                                                                                                                                                                                                                         |
| $\text{MAP } (\text{SND } : \beta \# \alpha \rightarrow \alpha) (\text{FILTER } (\lambda((x : \beta), (y : \alpha)). y \neq (z : \alpha)) (ls : (\beta \# \alpha) \text{ list})) = \text{FILTER } (\lambda(y : \alpha). z \neq y) (\text{MAP } (\text{SND } : \beta \# \alpha \rightarrow \alpha) ls)$                                                                                                                                                                                                                                                          |
| $\text{REPLICATE } (n : \text{num}) (a : \alpha) ++ \text{REPLICATE } (m : \text{num}) a = \text{REPLICATE } (n + m) a$                                                                                                                                                                                                                                                                                                                                                                                                                                         |
| $\forall (b : \text{bool}). \neg b \Rightarrow (b \Leftrightarrow F)$                                                                                                                                                                                                                                                                                                                                                                                                                                                                                           |
| $\forall (x : \alpha) (y : \beta) (a : \alpha) (b : \beta). (x, y) = (a, b) \Leftrightarrow x = a \wedge y = b$                                                                                                                                                                                                                                                                                                                                                                                                                                                 |
| $\forall (f : \alpha \rightarrow \beta) (n : \text{num}) (x : \alpha). \text{MAP } f (\text{REPLICATE } n x) = \text{REPLICATE } n (f x)$                                                                                                                                                                                                                                                                                                                                                                                                                       |
| $\forall (n : \text{num}) (l : \alpha \text{ list}). n < \text{LENGTH } l \Rightarrow \text{SNOG } (\text{EL } n l) (\text{TAKE } n l) = \text{TAKE } (\text{SUC } n) l$                                                                                                                                                                                                                                                                                                                                                                                        |
| $\text{PMATCH\_ROW\_COND\_EX } (i : \alpha) (p : \beta \rightarrow \alpha) (g : \beta \rightarrow \text{bool}) \Rightarrow \text{PMATCH\_ROW } p g (r : \beta \rightarrow \gamma) i = \text{SOME } (r (@(x : \beta). \text{PMATCH\_ROW\_COND } p g i x))$                                                                                                                                                                                                                                                                                                       |
| $\forall (R1 : \alpha \rightarrow \alpha \rightarrow \text{bool}) (R2 : \alpha \rightarrow \alpha \rightarrow \text{bool}) (x : \alpha) (y : \alpha). (R1 \cap_r R2)^* x y \Rightarrow (R1^* \cap_r R2^*) x y$                                                                                                                                                                                                                                                                                                                                                  |
| $\forall (P : \alpha \rightarrow \text{bool}) (a : \alpha) (s : \alpha \rightarrow \text{bool}). (\exists (x : \alpha). x \in a \text{ INSERT } s \wedge P x) \Leftrightarrow P a \vee \exists (x : \alpha). x \in s \wedge P x$                                                                                                                                                                                                                                                                                                                                |
| $\forall (f : \alpha \rightarrow \gamma) (g : \beta \rightarrow \delta) (z : \alpha + \beta). \text{SUM\_MAP } f g z = \text{if ISL } z \text{ then } (\text{INL } (f (\text{OUTL } z)) : \gamma + \delta) \text{ else } (\text{INR } (g (\text{OUTR } z)) : \gamma + \delta)$                                                                                                                                                                                                                                                                                  |
| $\forall (l : \alpha \text{ list list}). \text{REVERSE } (\text{FLAT } l) = \text{FLAT } (\text{REVERSE } (\text{MAP } (\text{REVERSE } : \alpha \text{ list} \rightarrow \alpha \text{ list}) l))$                                                                                                                                                                                                                                                                                                                                                             |
| $\forall (f1 : \alpha \rightarrow \beta) (f2 : \alpha \rightarrow \beta) (l : \alpha \text{ list}). \text{MAP } f1 l = \text{MAP } f2 l \Leftrightarrow \forall (e : \alpha). \text{MEM } e l \Rightarrow f1 e = f2 e$                                                                                                                                                                                                                                                                                                                                          |
| $(\$= : \alpha \rightarrow \alpha \rightarrow \text{bool})^T = (\$= : \alpha \rightarrow \alpha \rightarrow \text{bool})$                                                                                                                                                                                                                                                                                                                                                                                                                                       |
| $\forall (n : \text{num}) (l : \alpha \text{ list}). n < \text{LENGTH } l \Rightarrow \text{ELL } n (\text{REVERSE } l) = \text{ELL } (\text{PRE } (\text{LENGTH } l - n)) l$                                                                                                                                                                                                                                                                                                                                                                                   |
| $\forall (x : \alpha) (s : \alpha \rightarrow \text{bool}). (\emptyset : \alpha \rightarrow \text{bool}) \neq x \text{ INSERT } s$                                                                                                                                                                                                                                                                                                                                                                                                                              |
| $(\neg \text{SHORTLEX } (R : \alpha \rightarrow \alpha \rightarrow \text{bool}) ([ ] : \alpha \text{ list}) ([ ] : \alpha \text{ list}) \wedge \neg \text{SHORTLEX } R ((h1 : \alpha)::(t1 : \alpha \text{ list})) ([ ] : \alpha \text{ list})) \wedge \text{SHORTLEX } R ([ ] : \alpha \text{ list}) ((h2 : \alpha)::(t2 : \alpha \text{ list})) \wedge (\text{SHORTLEX } R (h1::t1) (h2::t2) \Leftrightarrow \text{LENGTH } t1 < \text{LENGTH } t2 \vee \text{LENGTH } t1 = \text{LENGTH } t2 \wedge (R h1 h2 \vee h1 = h2 \wedge \text{SHORTLEX } R t1 t2))$ |
| $(\forall (v : \alpha). \text{PMATCH\_IS\_EXHAUSTIVE } v ([ ] : (\alpha \rightarrow \beta \text{ option}) \text{ list}) \Leftrightarrow F) \wedge \forall (v : \gamma) (r : \gamma \rightarrow \delta \text{ option}) (rs : (\gamma \rightarrow \delta \text{ option}) \text{ list}). \text{PMATCH\_IS\_EXHAUSTIVE } v (r::rs) \Leftrightarrow r \neq (\text{NONE} : \delta \text{ option}) \vee \text{PMATCH\_IS\_EXHAUSTIVE } v rs$                                                                                                                           |
| $(\forall (s : \alpha \rightarrow \text{bool}). \mathbb{U}(:\alpha) \cap s = s) \wedge \forall (s : \alpha \rightarrow \text{bool}). s \cap \mathbb{U}(:\alpha) = s$                                                                                                                                                                                                                                                                                                                                                                                            |
| $\forall (f : \alpha \rightarrow \beta) (s : \alpha \rightarrow \text{bool}) (t : \beta \rightarrow \text{bool}). \text{BIJ } f s t \Leftrightarrow f \in \text{FUNSET } s t \wedge \forall (y : \beta). y \in t \Rightarrow \exists !(x : \alpha). x \in s \wedge y = f x$                                                                                                                                                                                                                                                                                     |
| $\forall (n : \text{num}) (l : \alpha \text{ list}). n \leq \text{LENGTH } l \Rightarrow \text{BUTLASTN } n l = \text{TAKE } (\text{LENGTH } l - n) l$                                                                                                                                                                                                                                                                                                                                                                                                          |
| $\forall (l2 : \alpha \text{ list}) (l1 : \alpha \text{ list}). \text{IS\_SUFFIX } (\text{REVERSE } l1) (\text{REVERSE } l2) \Leftrightarrow l2 \preceq l1$                                                                                                                                                                                                                                                                                                                                                                                                     |
| $\forall (s : \alpha \rightarrow \text{bool}) (x : \alpha) (y : \alpha). x \in s \text{ DELETE } y \Leftrightarrow x \in s \wedge x \neq y$                                                                                                                                                                                                                                                                                                                                                                                                                     |
| $\forall (ls : \alpha \text{ list}) (n : \text{num}). n \leq \text{LENGTH } ls \Rightarrow \text{REVERSE } (\text{DROP } n ls) = \text{REVERSE } (\text{LASTN } (\text{LENGTH } ls - n) ls)$                                                                                                                                                                                                                                                                                                                                                                    |
| $\forall (f : \alpha \rightarrow \beta). \text{PREIMAGE } f (\emptyset : \beta \rightarrow \text{bool}) = (\emptyset : \alpha \rightarrow \text{bool})$                                                                                                                                                                                                                                                                                                                                                                                                         |
| $\forall (f : \alpha \rightarrow \beta) (l : \alpha \text{ list}). \text{MAP } f (\text{REVERSE } l) = \text{REVERSE } (\text{MAP } f l)$                                                                                                                                                                                                                                                                                                                                                                                                                       |
| $\forall (s : \alpha \rightarrow \text{bool}) (t : \alpha \rightarrow \text{bool}) (x : \alpha). (s \cup t) x \Leftrightarrow x \in s \vee x \in t$                                                                                                                                                                                                                                                                                                                                                                                                             |

|                                                                                                                                                                                                                                                                                                                                                                                                        |
|--------------------------------------------------------------------------------------------------------------------------------------------------------------------------------------------------------------------------------------------------------------------------------------------------------------------------------------------------------------------------------------------------------|
| $\forall (n : \text{num}). \text{LENGTH } (\text{COUNT\_LIST } n) = n$                                                                                                                                                                                                                                                                                                                                 |
| $(\exists (p : \alpha \# \beta). (P : \alpha \# \beta \rightarrow \text{bool}) p) \Leftrightarrow \exists (p\_1 : \alpha) (p\_2 : \beta). P (p\_1, p\_2)$                                                                                                                                                                                                                                              |
| $\forall (l1 : \alpha \text{ list}) (l2 : \alpha \text{ list}). l1 ++ l2 = \text{FOLDR } (\text{CONS} : \alpha \rightarrow \alpha \text{ list} \rightarrow \alpha \text{ list}) l2 l1$                                                                                                                                                                                                                 |
| $\forall (s : \alpha \rightarrow \text{bool}) (x : \alpha). \text{COMPL } (x \text{ INSERT } s) = \text{COMPL } s \text{ DELETE } x$                                                                                                                                                                                                                                                                   |
| $\forall (t : \text{bool}). t \Rightarrow T \Leftrightarrow T$                                                                                                                                                                                                                                                                                                                                         |
| $\text{countable } (\emptyset : \alpha \rightarrow \text{bool})$                                                                                                                                                                                                                                                                                                                                       |
| $\forall (R : \alpha \rightarrow \alpha \rightarrow \text{bool}). \text{Order } R \Leftrightarrow \text{StrongOrder } (\text{STRORD } R)$                                                                                                                                                                                                                                                              |
| $\forall (x : \text{bool}) (x' : \text{bool}) (y : \text{bool}) (y' : \text{bool}). (x \Rightarrow y \Rightarrow y') \wedge (\neg y' \Rightarrow x' \Rightarrow x) \Rightarrow (x \Rightarrow y) \Rightarrow x' \Rightarrow y'$                                                                                                                                                                        |
| $(x : \alpha \text{ list}) \leq (y : \alpha) :: (ys : \alpha \text{ list}) \Leftrightarrow x = ([] : \alpha \text{ list}) \vee \exists (xs : \alpha \text{ list}). x = y :: xs \wedge xs \leq ys$                                                                                                                                                                                                      |
| $\forall (P : \alpha \rightarrow \text{bool}) (l : \alpha \text{ list}) (m : \text{num}). \text{EVERY } P l \Rightarrow \text{EVERY } P (\text{TAKE } m l)$                                                                                                                                                                                                                                            |
| $\text{IS\_SOME } (\text{OPTION\_BIND } (x : \alpha \text{ option}) (g : \alpha \rightarrow \beta \text{ option})) \Rightarrow \text{IS\_SOME } x$                                                                                                                                                                                                                                                     |
| $(\forall (x : \alpha) (y : \alpha). (R : \alpha \rightarrow \alpha \rightarrow \text{bool}) x y \Rightarrow (Q : \alpha \rightarrow \alpha \rightarrow \text{bool}) x y) \Rightarrow R^\star (x : \alpha) (y : \alpha) \Rightarrow Q^\star x y$                                                                                                                                                       |
| $\forall (x : \alpha \text{ list}). x \leq x$                                                                                                                                                                                                                                                                                                                                                          |
| $\text{count } (0 : \text{num}) = (\emptyset : \text{num} \rightarrow \text{bool})$                                                                                                                                                                                                                                                                                                                    |
| $(\forall (x : \alpha). (P : \alpha \rightarrow \text{bool}) x \Rightarrow (Q : \alpha \rightarrow \text{bool}) x) \Rightarrow \text{EXISTS } P (l : \alpha \text{ list}) \Rightarrow \text{EXISTS } Q l$                                                                                                                                                                                              |
| $\forall (s : \alpha \rightarrow \text{bool}) (t : \alpha \rightarrow \text{bool}). s \subseteq t \Rightarrow s \cap t = s$                                                                                                                                                                                                                                                                            |
| $\forall (R : \alpha \rightarrow \alpha \rightarrow \text{bool}) (x : \alpha) (y : \alpha). R x y \Rightarrow R^+ x y$                                                                                                                                                                                                                                                                                 |
| $\forall (xs : \alpha \text{ list}). \text{FILTER } (\lambda (x : \alpha). T) xs = xs$                                                                                                                                                                                                                                                                                                                 |
| $\forall (s : \alpha \rightarrow \text{bool}). (\lambda (x : \alpha). x) \text{ PERMUTES } s$                                                                                                                                                                                                                                                                                                          |
| $\forall (l1 : \alpha \text{ list}) (n : \text{num}). \text{LENGTH } l1 \leq n \Rightarrow \forall (l2 : \alpha \text{ list}). \text{TAKE } n (l1 ++ l2) = l1 ++ \text{TAKE } (n - \text{LENGTH } l1) l2$                                                                                                                                                                                              |
| $\forall (s : \alpha \rightarrow \text{bool}). \text{INFINITE } s \Rightarrow \forall (t : \alpha \rightarrow \text{bool}). s \subseteq t \Rightarrow \text{INFINITE } t$                                                                                                                                                                                                                              |
| $(\text{option\_CASE } (\text{NONE} : \alpha \text{ option}) : \beta \rightarrow (\alpha \rightarrow \beta) \rightarrow \beta) = (\lambda (v : \beta) (f : \alpha \rightarrow \beta). v) \wedge (\text{option\_CASE } (\text{SOME } (x : \alpha)) : \beta \rightarrow (\alpha \rightarrow \beta) \rightarrow \beta) = (\lambda (v : \beta) (f : \alpha \rightarrow \beta). f x)$                       |
| $\forall (t : \text{bool}). t \Rightarrow F \Leftrightarrow \neg t$                                                                                                                                                                                                                                                                                                                                    |
| $\forall (f1 : \alpha \rightarrow \text{bool}) (f2 : \alpha \rightarrow \text{bool}) (l : \alpha \text{ list}). \text{FILTER } f1 (\text{FILTER } f2 l) = \text{FILTER } f2 (\text{FILTER } f1 l)$                                                                                                                                                                                                     |
| $\forall (f : \alpha \rightarrow \beta) (P : \alpha \rightarrow \text{bool}) (Q : \beta \rightarrow \text{bool}). \text{FUNSET } P Q f \Leftrightarrow \forall (x : \alpha). x \in P \Rightarrow f x \in Q$                                                                                                                                                                                            |
| $\mathbb{U} : (\alpha + \beta) = \text{IMAGE } (\text{INL} : \alpha \rightarrow \alpha + \beta) \mathbb{U}(\alpha) \cup \text{IMAGE } (\text{INR} : \beta \rightarrow \alpha + \beta) \mathbb{U}(\beta)$                                                                                                                                                                                               |
| $\forall (x : \alpha) (s : \alpha \rightarrow \text{bool}). s \subseteq x \text{ INSERT } s$                                                                                                                                                                                                                                                                                                           |
| $\forall (l : \alpha \text{ list}) (x : \alpha). l \neq x :: l \wedge x :: l \neq l$                                                                                                                                                                                                                                                                                                                   |
| $\text{PROD\_SET } (\emptyset : \text{num} \rightarrow \text{bool}) = (1 : \text{num}) \wedge \forall (x : \text{num}) (s : \text{num} \rightarrow \text{bool}). \text{FINITE } s \Rightarrow \text{PROD\_SET } (x \text{ INSERT } s) = x * \text{PROD\_SET } (s \text{ DELETE } x)$                                                                                                                   |
| $\forall (f : \alpha \rightarrow \beta) (s : \beta \rightarrow \text{bool}) (x : \alpha). \text{PREIMAGE } f s x \Leftrightarrow f x \in s$                                                                                                                                                                                                                                                            |
| $\forall (f : \alpha \rightarrow \beta \rightarrow \beta) (e : \beta) (l1 : \alpha \text{ list}) (l2 : \alpha \text{ list}). \text{FOLDR } f e (l1 ++ l2) = \text{FOLDR } f (\text{FOLDR } f e l2) l1$                                                                                                                                                                                                 |
| $\forall (n : \text{num}) (l : \alpha \text{ list}). n \leq \text{LENGTH } l \Rightarrow \text{DROP } n l = \text{LASTN } (\text{LENGTH } l - n) l$                                                                                                                                                                                                                                                    |
| $\forall (n : \text{num}) (l : \alpha \text{ list}). n \leq \text{LENGTH } l \Rightarrow \text{LENGTH } (\text{TAKE } n l) = n$                                                                                                                                                                                                                                                                        |
| $(0 : \text{num}) < (n : \text{num}) \Rightarrow \text{DROP } n ((x : \alpha) :: (xs : \alpha \text{ list})) = \text{DROP } (n - (1 : \text{num})) xs$                                                                                                                                                                                                                                                 |
| $\forall (l : \text{bool list}). \text{AND\_EL } l \Leftrightarrow \text{FOLDL } \$ / \wedge T l$                                                                                                                                                                                                                                                                                                      |
| $\forall (P : \alpha \rightarrow \text{bool}) (l : \alpha \text{ list}). \text{FILTER } P l = ([] : \alpha \text{ list}) \Leftrightarrow \text{EVERY } (\lambda (x : \alpha). \neg P x) l$                                                                                                                                                                                                             |
| $\forall (v : \alpha) (\text{rows} : (\alpha \rightarrow \beta \text{ option}) \text{ list}) (p : \text{bool}) (\text{infos} : \text{bool list}). \text{FST } (\text{STRONGEST\_REDUNDANT\_ROWS\_INFO\_AUX } v \text{ rows } p \text{ infos}) \Leftrightarrow p \wedge \text{EVERY } (\lambda (r : \alpha \rightarrow \beta \text{ option}). r v = (\text{NONE} : \beta \text{ option})) \text{ rows}$ |
| $\forall (s : \alpha \rightarrow \text{bool}). s \cap s = s$                                                                                                                                                                                                                                                                                                                                           |

|                                                                                                                                                                                                                                                                                                                                                                                                                                                                                                                                                                                                         |
|---------------------------------------------------------------------------------------------------------------------------------------------------------------------------------------------------------------------------------------------------------------------------------------------------------------------------------------------------------------------------------------------------------------------------------------------------------------------------------------------------------------------------------------------------------------------------------------------------------|
| $\forall(x:\alpha \rightarrow \text{bool}) (y:\alpha \rightarrow \text{bool}) (z:\alpha \rightarrow \text{bool}). x \text{ DIFF } y \text{ DIFF } z = x \text{ DIFF } z \text{ DIFF } y$                                                                                                                                                                                                                                                                                                                                                                                                                |
| $\forall(c:\text{bool}) (x:\text{bool}) (x':\text{bool}) (y:\text{bool}) (y':\text{bool}). (c \Rightarrow x' \Rightarrow x) \wedge (\neg c \Rightarrow y' \Rightarrow y) \Rightarrow (\text{if } c \text{ then } x' \text{ else } y') \Rightarrow \text{if } c \text{ then } x \text{ else } y$                                                                                                                                                                                                                                                                                                         |
| $\forall(x:\alpha). \text{SING } \{x\}$                                                                                                                                                                                                                                                                                                                                                                                                                                                                                                                                                                 |
| $((a:\alpha), (b:\alpha)) \in \{(x,x) \mid (P:\alpha \rightarrow \text{bool}) x\} \Leftrightarrow P a \wedge a = b$                                                                                                                                                                                                                                                                                                                                                                                                                                                                                     |
| $\forall(M:\alpha \text{ list}) (M':\alpha \text{ list}) (v:\beta) (f:\alpha \rightarrow \alpha \text{ list} \rightarrow \beta). M = M' \wedge (M' = ([]:\alpha \text{ list}) \Rightarrow v = (v':\beta)) \wedge (\forall(a0:\alpha) (a1:\alpha \text{ list}). M' = a0::a1 \Rightarrow f a0 a1 = (f':\alpha \rightarrow \alpha \text{ list} \rightarrow \beta) a0 a1 \Rightarrow (\text{list\_CASE } M v f :\beta) = (\text{list\_CASE } M' v' f' :\beta))$                                                                                                                                             |
| $\forall(x:\alpha) (l:\alpha \text{ list}). \text{SNOG } x l \neq ([]:\alpha \text{ list})$                                                                                                                                                                                                                                                                                                                                                                                                                                                                                                             |
| $\forall(g:\alpha \rightarrow \alpha \rightarrow \alpha) (f:\beta \rightarrow \alpha \rightarrow \alpha). \text{FCOMM } g f \Rightarrow \forall(e:\alpha). \text{LEFT\_ID } g e \Rightarrow \forall(l:\beta \text{ list list}). \text{FOLDR } f e (\text{FLAT } l) = \text{FOLDR } g e (\text{MAP } (\text{FOLDR } f e) l)$                                                                                                                                                                                                                                                                             |
| $\forall(m:\text{num}) (n:\text{num}). m < \text{SUC } n \Rightarrow m \neq n \Rightarrow m < n$                                                                                                                                                                                                                                                                                                                                                                                                                                                                                                        |
| $\forall(s:\alpha \rightarrow \text{bool}) (t:\alpha \rightarrow \text{bool}) (u:\alpha \rightarrow \text{bool}). s \subset t \wedge t \subset u \Rightarrow s \subset u$                                                                                                                                                                                                                                                                                                                                                                                                                               |
| $\forall(s:\alpha \rightarrow \text{bool}) (t:\alpha \rightarrow \text{bool}). \text{FINITE } s \wedge \text{FINITE } t \Rightarrow \text{CARD } (s \cup t) = \text{CARD } s + \text{CARD } t - \text{CARD } (s \cap t)$                                                                                                                                                                                                                                                                                                                                                                                |
| $\forall(s:\alpha \rightarrow \text{bool}). \mathbb{U}(\alpha) \subseteq s \Leftrightarrow s = \mathbb{U}(\alpha)$                                                                                                                                                                                                                                                                                                                                                                                                                                                                                      |
| $\forall(v:\alpha) (\text{rows}:(\alpha \rightarrow \beta \text{ option}) \text{ list}) (p:\text{bool}) (\text{infos}:\text{bool list}). \text{LENGTH } (\text{STRONGEST\_REDUNDANT\_ROWS\_INFO\_AUX } v \text{ rows } p \text{ infos}) = \text{LENGTH } \text{rows} + \text{LENGTH } \text{infos}$                                                                                                                                                                                                                                                                                                     |
| $\text{LIST\_REL } (R:\alpha \rightarrow \beta \rightarrow \text{bool}) (xs:\alpha \text{ list}) ((h:\beta)::(t:\beta \text{ list})) \Leftrightarrow \exists(h':\alpha) (t':\alpha \text{ list}). xs = h':::t' \wedge R h' h \wedge \text{LIST\_REL } R t' t$                                                                                                                                                                                                                                                                                                                                           |
| $(\forall(x:\alpha) (y:\alpha). (P:\alpha \rightarrow \text{bool}) x \wedge (R:\alpha \rightarrow \alpha \rightarrow \text{bool}) x y \Rightarrow P y) \Rightarrow \forall(x:\alpha) (y:\alpha). P x \wedge R^* x y \Rightarrow P y$                                                                                                                                                                                                                                                                                                                                                                    |
| $((p:\text{bool}) \Leftrightarrow \text{if } (q:\text{bool}) \text{ then } (r:\text{bool}) \text{ else } (s:\text{bool})) \Leftrightarrow (p \vee q \vee \neg s) \wedge (p \vee \neg r \vee \neg q) \wedge (p \vee \neg r \vee \neg s) \wedge (\neg q \vee r \vee \neg p) \wedge (q \vee s \vee \neg p)$                                                                                                                                                                                                                                                                                                |
| $\forall(s:\alpha \rightarrow \text{bool}) (x:\alpha). x \in s \Leftrightarrow \exists(t:\alpha \rightarrow \text{bool}). s = x \text{ INSERT } t \wedge x \notin t$                                                                                                                                                                                                                                                                                                                                                                                                                                    |
| $\text{PMATCH\_ROW\_REDUNDANT } (v:\alpha) ((r:\alpha \rightarrow \beta \text{ option}):(rs:(\alpha \rightarrow \beta \text{ option}) \text{ list})) (0:\text{num}) \Leftrightarrow r v = (\text{NONE}:\beta \text{ option})$                                                                                                                                                                                                                                                                                                                                                                           |
| $\forall(s:\alpha \rightarrow \text{bool}) (t:\alpha \rightarrow \text{bool}). \text{DISJOINT } t (s \text{ DIFF } t) \wedge \text{DISJOINT } (s \text{ DIFF } t) t$                                                                                                                                                                                                                                                                                                                                                                                                                                    |
| $\forall(f:\alpha \rightarrow \beta \rightarrow \text{bool}) (s:\alpha \rightarrow \text{bool}) (y:\beta). y \in \text{BIGUNION } (\text{IMAGE } f s) \Leftrightarrow \exists(x:\alpha). x \in s \wedge y \in f x$                                                                                                                                                                                                                                                                                                                                                                                      |
| $(\forall(e:\alpha). \text{LIST\_ELEM\_COUNT } e ([]:\alpha \text{ list}) = (0:\text{num})) \wedge (\forall(e:\beta) (l1:\beta \text{ list}) (l2:\beta \text{ list}). \text{LIST\_ELEM\_COUNT } e (l1 ++ l2) = \text{LIST\_ELEM\_COUNT } e l1 + \text{LIST\_ELEM\_COUNT } e l2) \wedge (\forall(e:\gamma) (h:\gamma) (l:\gamma \text{ list}). h = e \Rightarrow \text{LIST\_ELEM\_COUNT } e (h::l) = \text{SUC } (\text{LIST\_ELEM\_COUNT } e l)) \wedge \forall(e:\delta) (h:\delta) (l:\delta \text{ list}). h \neq e \Rightarrow \text{LIST\_ELEM\_COUNT } e (h::l) = \text{LIST\_ELEM\_COUNT } e l$ |
| $\forall(s:\alpha \rightarrow \text{bool}) (t:\alpha \rightarrow \text{bool}) (x:\alpha). (s \cap t) x \Leftrightarrow x \in s \wedge x \in t$                                                                                                                                                                                                                                                                                                                                                                                                                                                          |
| $\forall(P:\alpha \rightarrow \text{bool}) (l1:\alpha \text{ list}) (l2:\alpha \text{ list}). \text{EXISTS } P (l1 ++ l2) \Leftrightarrow \text{EXISTS } P l1 \vee \text{EXISTS } P l2$                                                                                                                                                                                                                                                                                                                                                                                                                 |
| $\forall(l_s:\alpha \text{ list}) (f:\alpha \# \alpha \rightarrow \beta). \text{MAP } f (\text{ZIP } (l_s, l_s)) = \text{MAP } (\lambda(x:\alpha). f (x, x)) l_s$                                                                                                                                                                                                                                                                                                                                                                                                                                       |
| $\text{MAP } (f:\alpha \rightarrow \beta) (l:\alpha \text{ list}) = (h:\beta)::(t:\beta \text{ list}) \Leftrightarrow \exists(x0:\alpha) (t0:\alpha \text{ list}). l = x0::t0 \wedge h = f x0 \wedge t = \text{MAP } f t0$                                                                                                                                                                                                                                                                                                                                                                              |
| $\forall(R:\alpha \rightarrow \alpha \rightarrow \text{bool}). \text{symmetric } R \Rightarrow \text{SC } R = R$                                                                                                                                                                                                                                                                                                                                                                                                                                                                                        |
| $\forall(l1:\alpha \text{ list}) (l2:\alpha \text{ list}). \text{SHORTLEX } (R:\alpha \rightarrow \alpha \rightarrow \text{bool}) l1 l2 \Rightarrow \text{LENGTH } l1 \leq \text{LENGTH } l2$                                                                                                                                                                                                                                                                                                                                                                                                           |
| $\forall(f:\beta \rightarrow \alpha \rightarrow \beta) (e:\beta) (x:\alpha) (l:\alpha \text{ list}). \text{FOLDL } f e (\text{SNOG } x l) = f (\text{FOLDL } f e l) x$                                                                                                                                                                                                                                                                                                                                                                                                                                  |
| $\forall(P:(\alpha \rightarrow \text{bool}) \rightarrow \text{bool}). P (\emptyset:\alpha \rightarrow \text{bool}) \wedge (\forall(s:\alpha \rightarrow \text{bool}). \text{FINITE } s \wedge P s \Rightarrow \forall(e:\alpha). e \notin s \Rightarrow P (e \text{ INSERT } s)) \Rightarrow \forall(s:\alpha \rightarrow \text{bool}). \text{FINITE } s \Rightarrow P s$                                                                                                                                                                                                                               |
| $\forall(s:\alpha \rightarrow \text{bool}). \text{FINITE } s \Rightarrow \text{FINITE } (\text{REST } s)$                                                                                                                                                                                                                                                                                                                                                                                                                                                                                               |

|                                                                                                                                                                                                                                                                                                                                                                                                                                                                                                                                                                                                                                                                                                    |
|----------------------------------------------------------------------------------------------------------------------------------------------------------------------------------------------------------------------------------------------------------------------------------------------------------------------------------------------------------------------------------------------------------------------------------------------------------------------------------------------------------------------------------------------------------------------------------------------------------------------------------------------------------------------------------------------------|
| $\forall (s : \alpha \rightarrow \text{bool}). \text{FINITE } s \Rightarrow \exists (f : \text{num} \rightarrow \alpha) (b : \text{num}). \text{BIJ } f (\text{count } b) s$                                                                                                                                                                                                                                                                                                                                                                                                                                                                                                                       |
| $\forall (P : \alpha \rightarrow \text{bool}) (l1 : \alpha \text{ list}) (l2 : \alpha \text{ list}). \text{EVERY } P l1 \Rightarrow \text{dropWhile } P (l1 ++ l2) = \text{dropWhile } P l2$                                                                                                                                                                                                                                                                                                                                                                                                                                                                                                       |
| $(\text{OPTION\_IGNORE\_BIND } (m1 : \alpha \text{ option}) (m2 : \beta \text{ option}) = (\text{NONE} : \beta \text{ option}) \Leftrightarrow m1 = (\text{NONE} : \alpha \text{ option}) \vee m2 = (\text{NONE} : \beta \text{ option})) \wedge (\text{OPTION\_IGNORE\_BIND } m1 m2 = \text{SOME } (y : \beta) \Leftrightarrow \exists (x : \alpha). m1 = \text{SOME } x \wedge m2 = \text{SOME } y)$                                                                                                                                                                                                                                                                                             |
| $\forall (P : \alpha \rightarrow \text{bool}) (l : \alpha \text{ list}). \text{EVERY } P l \Leftrightarrow \neg \text{EXISTS } (\lambda (x : \alpha). \neg P x) l$                                                                                                                                                                                                                                                                                                                                                                                                                                                                                                                                 |
| $\forall (s : \alpha \rightarrow \text{bool}). s = \mathbb{U}(\alpha) \Rightarrow \forall (v : \alpha). v \in s$                                                                                                                                                                                                                                                                                                                                                                                                                                                                                                                                                                                   |
| $\forall (n : \text{num}). \text{SUC } (m : \text{num}) = n \Rightarrow m < n$                                                                                                                                                                                                                                                                                                                                                                                                                                                                                                                                                                                                                     |
| $((\text{if } (P : \text{bool}) \text{ then } \text{SOME } (x : \alpha) \text{ else } (\text{NONE} : \alpha \text{ option})) = (\text{NONE} : \alpha \text{ option}) \Leftrightarrow \neg P) \wedge ((\text{if } P \text{ then } (\text{NONE} : \alpha \text{ option}) \text{ else } \text{SOME } x) = (\text{NONE} : \alpha \text{ option}) \Leftrightarrow P) \wedge ((\text{if } P \text{ then } \text{SOME } x \text{ else } (\text{NONE} : \alpha \text{ option})) = \text{SOME } (y : \alpha) \Leftrightarrow P \wedge x = y) \wedge ((\text{if } P \text{ then } (\text{NONE} : \alpha \text{ option}) \text{ else } \text{SOME } x) = \text{SOME } y \Leftrightarrow \neg P \wedge x = y)$ |
| $(\text{some}(x : \text{bool}). x) = \text{SOME } T$                                                                                                                                                                                                                                                                                                                                                                                                                                                                                                                                                                                                                                               |
| $\text{REDUNDANT\_ROWS\_INFOS\_CONJ } ([] : \text{bool list}) ([] : \text{bool list}) = ([] : \text{bool list}) \wedge \text{REDUNDANT\_ROWS\_INFOS\_CONJ } ((i1 : \text{bool}) :: (is1 : \text{bool list})) ((i2 : \text{bool}) :: (is2 : \text{bool list})) = (i1 \wedge i2) :: \text{REDUNDANT\_ROWS\_INFOS\_CONJ } is1 is2$                                                                                                                                                                                                                                                                                                                                                                    |
| $\forall (l : \text{num list list}). \text{SUM } (\text{FLAT } l) = \text{SUM } (\text{MAP SUM } l)$                                                                                                                                                                                                                                                                                                                                                                                                                                                                                                                                                                                               |
| $\forall (x : \alpha \text{ recspace}) (y : \alpha \text{ recspace}). \text{dest\_rec } x = \text{dest\_rec } y \Leftrightarrow x = y$                                                                                                                                                                                                                                                                                                                                                                                                                                                                                                                                                             |
| $((R1 : \alpha \rightarrow \alpha \rightarrow \text{bool}) \text{LEX } (R2 : \beta \rightarrow \beta \rightarrow \text{bool})) ((a : \alpha), (b : \beta)) ((c : \alpha), (d : \beta)) \Leftrightarrow R1 a c \vee a = c \wedge R2 b d$                                                                                                                                                                                                                                                                                                                                                                                                                                                            |
| $(\forall (l : \alpha \text{ list}). ([] : \alpha \text{ list}) \leq l \Leftrightarrow T) \wedge (\forall (x : \alpha) (l : \alpha \text{ list}). x :: l \leq ([] : \alpha \text{ list}) \Leftrightarrow F) \wedge \forall (x1 : \alpha) (l1 : \alpha \text{ list}) (x2 : \alpha) (l2 : \alpha \text{ list}). x2 :: l2 \leq x1 :: l1 \Leftrightarrow x1 = x2 \wedge l2 \leq l1$                                                                                                                                                                                                                                                                                                                    |
| $\forall (n : \text{num}) (l : \alpha \text{ list}). n \leq \text{LENGTH } l \Rightarrow \text{DROP } n (\text{REVERSE } l) = \text{REVERSE } (\text{BUTLASTN } n l)$                                                                                                                                                                                                                                                                                                                                                                                                                                                                                                                              |
| $\forall (l : \alpha \text{ list}) (f : \alpha \rightarrow \beta) (x : \beta). \text{MEM } x (\text{MAP } f l) \Leftrightarrow \exists (y : \alpha). x = f y \wedge \text{MEM } y l$                                                                                                                                                                                                                                                                                                                                                                                                                                                                                                               |
| $\forall (f : \alpha \rightarrow \beta) (s : \beta \rightarrow \text{bool}) (t : \beta \rightarrow \text{bool}). s \subseteq t \Rightarrow \text{PREIMAGE } f s \subseteq \text{PREIMAGE } f t$                                                                                                                                                                                                                                                                                                                                                                                                                                                                                                    |
| $\text{PROD\_ALL } (P : \alpha \rightarrow \text{bool}) (Q : \beta \rightarrow \text{bool}) ((x : \alpha), (y : \beta)) \Leftrightarrow P x \wedge Q y$                                                                                                                                                                                                                                                                                                                                                                                                                                                                                                                                            |
| $\forall (R : \alpha \rightarrow \alpha \rightarrow \text{bool}) (x : \alpha) (y : \alpha). R^+ x y \Rightarrow R^* x y$                                                                                                                                                                                                                                                                                                                                                                                                                                                                                                                                                                           |
| $\forall (l2 : \alpha \text{ list}) (l1 : \alpha \text{ list}). \text{BUTLASTN } (\text{LENGTH } l2) (l1 ++ l2) = l1$                                                                                                                                                                                                                                                                                                                                                                                                                                                                                                                                                                              |
| $\forall (l : \alpha \text{ list}). \text{LENGTH } l = \text{FOLDL } (\lambda (x : \alpha) (l' : \text{num}). \text{SUC } l') (0 : \text{num}) l$                                                                                                                                                                                                                                                                                                                                                                                                                                                                                                                                                  |
| $\forall (n : \text{num}) (l : \alpha \text{ list}). n \leq \text{LENGTH } l \Rightarrow \text{LASTN } n l = \text{DROP } (\text{LENGTH } l - n) l$                                                                                                                                                                                                                                                                                                                                                                                                                                                                                                                                                |
| $\forall (t : \text{bool}). F \vee t \Leftrightarrow t$                                                                                                                                                                                                                                                                                                                                                                                                                                                                                                                                                                                                                                            |
| $\forall (f : \alpha \rightarrow \beta) (s : \beta \rightarrow \text{bool}). \text{IMAGE } f (\text{PREIMAGE } f s) \subseteq s$                                                                                                                                                                                                                                                                                                                                                                                                                                                                                                                                                                   |
| $\forall (s : \alpha \rightarrow \text{bool}) (t : \alpha \rightarrow \text{bool}). s \subset t \Leftrightarrow s \subseteq t \wedge \exists (y : \alpha). y \in t \wedge y \notin s$                                                                                                                                                                                                                                                                                                                                                                                                                                                                                                              |
| $(R : \alpha \rightarrow \alpha \rightarrow \text{bool})^+ (x : \alpha) (z : \alpha) \Leftrightarrow R x z \vee \exists (y : \alpha). R x y \wedge R^+ y z$                                                                                                                                                                                                                                                                                                                                                                                                                                                                                                                                        |
| $\forall (m : \text{num}) (n : \text{num}) (l : \alpha \text{ list}). m \leq n \wedge n \leq \text{LENGTH } l \Rightarrow \text{BUTLASTN } m (\text{LASTN } n l) = \text{LASTN } (n - m) (\text{BUTLASTN } m l)$                                                                                                                                                                                                                                                                                                                                                                                                                                                                                   |
| $\forall (f : \alpha \rightarrow \beta) (P : \alpha \rightarrow \text{bool}) (Q : \alpha \rightarrow \beta \rightarrow \text{bool}). f \in \text{DFUNSET } P Q \Leftrightarrow \forall (x : \alpha). x \in P \Rightarrow f x \in Q x$                                                                                                                                                                                                                                                                                                                                                                                                                                                              |
| $(\forall (x : \alpha). \text{MEM } x ([] : \alpha \text{ list}) \Leftrightarrow F) \wedge \forall (x : \alpha) (h : \alpha) (t : \alpha \text{ list}). \text{MEM } x (h :: t) \Leftrightarrow x = h \vee \text{MEM } x t$                                                                                                                                                                                                                                                                                                                                                                                                                                                                         |
| $\forall (x : \alpha) (s : \alpha \rightarrow \text{bool}). x \notin s \Leftrightarrow s \text{ DELETE } x = s$                                                                                                                                                                                                                                                                                                                                                                                                                                                                                                                                                                                    |
| $((\text{INL } (a : \alpha) : \alpha + \beta) \in (A : \alpha \rightarrow \text{bool}) \sqcup (B : \beta \rightarrow \text{bool}) \Leftrightarrow a \in A) \wedge ((\text{INR } (b : \beta) : \alpha + \beta) \in A \sqcup B \Leftrightarrow b \in B)$                                                                                                                                                                                                                                                                                                                                                                                                                                             |
| $\text{WF } (\lambda (x : \text{num}) (y : \text{num}). y = \text{SUC } x)$                                                                                                                                                                                                                                                                                                                                                                                                                                                                                                                                                                                                                        |
| $\forall (L : \text{num list}) (n : \text{num}). \text{SUM\_ACC } L n = \text{SUM } L + n$                                                                                                                                                                                                                                                                                                                                                                                                                                                                                                                                                                                                         |
| $\text{INFINITE } \mathbb{U}(\alpha) \Leftrightarrow \forall (s : \alpha \rightarrow \text{bool}). \text{FINITE } s \Rightarrow s \subset \mathbb{U}(\alpha)$                                                                                                                                                                                                                                                                                                                                                                                                                                                                                                                                      |

|                                                                                                                                                                                                                                                                                                                                                                                                                                                                                           |  |
|-------------------------------------------------------------------------------------------------------------------------------------------------------------------------------------------------------------------------------------------------------------------------------------------------------------------------------------------------------------------------------------------------------------------------------------------------------------------------------------------|--|
| $\forall (ls : \alpha \text{ list list}). \text{FLAT } ls = ([] : \alpha \text{ list}) \Leftrightarrow \text{EVERY } (\$ = ([] : \alpha \text{ list})) \text{ } ls$                                                                                                                                                                                                                                                                                                                       |  |
| $\forall (f : \alpha \rightarrow \beta). (\forall (s : \beta \rightarrow \text{bool}). \text{INJ } f (\emptyset : \alpha \rightarrow \text{bool}) s) \wedge \forall (s : \alpha \rightarrow \text{bool}). \text{INJ } f s (\emptyset : \beta \rightarrow \text{bool}) \Leftrightarrow s = (\emptyset : \alpha \rightarrow \text{bool})$                                                                                                                                                   |  |
| $\forall (l : \alpha \text{ list}) (f : \alpha \rightarrow \beta). (\text{MAP } f \text{ } l = ([] : \beta \text{ list}) \Leftrightarrow l = ([] : \alpha \text{ list})) \wedge (([] : \beta \text{ list}) = \text{MAP } f \text{ } l \Leftrightarrow l = ([] : \alpha \text{ list}))$                                                                                                                                                                                                    |  |
| $\forall (l : \text{num list}). \text{SUM } l = \text{FOLDER } \$+ (0 : \text{num}) \text{ } l$                                                                                                                                                                                                                                                                                                                                                                                           |  |
| $\forall (R : \alpha \rightarrow \beta \rightarrow \text{bool}) (l1 : \alpha \text{ list}) (l2 : \beta \text{ list}) (n : \text{num}). \text{LIST\_REL } R \text{ } l1 \text{ } l2 \Rightarrow \text{LIST\_REL } R (\text{DROP } n \text{ } l1) (\text{DROP } n \text{ } l2)$                                                                                                                                                                                                             |  |
| $(\text{some}(x : \alpha). F) = (\text{NONE} : \alpha \text{ option})$                                                                                                                                                                                                                                                                                                                                                                                                                    |  |
| $\forall (f : \alpha \rightarrow \beta) (l1 : \alpha \text{ list}) (l2 : \alpha \text{ list}). \text{MAP } f (l1 ++ l2) = \text{MAP } f \text{ } l1 ++ \text{MAP } f \text{ } l2$                                                                                                                                                                                                                                                                                                         |  |
| $\forall (g : \alpha \rightarrow \alpha \rightarrow \alpha) (f : \beta \rightarrow \alpha \rightarrow \alpha). \text{FCOMM } g \text{ } f \Rightarrow \forall (e : \alpha). \text{LEFT\_ID } g \text{ } e \Rightarrow \forall (l1 : \beta \text{ list}) (l2 : \beta \text{ list}). \text{FOLDER } f \text{ } e (l1 ++ l2) = g (\text{FOLDER } f \text{ } e \text{ } l1) (\text{FOLDER } f \text{ } e \text{ } l2)$                                                                        |  |
| $\emptyset (x : \alpha) \Leftrightarrow F$                                                                                                                                                                                                                                                                                                                                                                                                                                                |  |
| $\forall (R : \alpha \rightarrow \alpha \rightarrow \text{bool}). \text{WeakLinearOrder } R \Leftrightarrow \text{WeakOrder } R \wedge \forall (a : \alpha) (b : \alpha). R \text{ } a \text{ } b \vee R \text{ } b \text{ } a$                                                                                                                                                                                                                                                           |  |
| $\forall (R : \alpha \rightarrow \beta \rightarrow \text{bool}) (R' : \gamma \rightarrow \alpha \rightarrow \text{bool}). (R \circ_r R')^T = R'^T \circ_r R^T$                                                                                                                                                                                                                                                                                                                            |  |
| $\forall (x : \alpha) (l : \alpha \text{ list}). x :: l = [x] ++ l$                                                                                                                                                                                                                                                                                                                                                                                                                       |  |
| $\forall (f : \alpha \rightarrow \beta) (l : \alpha \text{ list}). \text{MAP } f \text{ } l = \text{FOLDER } (\lambda (x : \alpha) (l' : \beta \text{ list}). f x :: l') ([] : \beta \text{ list}) \text{ } l$                                                                                                                                                                                                                                                                            |  |
| $\forall (x : \alpha). x \in \mathbb{U}(:\alpha)$                                                                                                                                                                                                                                                                                                                                                                                                                                         |  |
| $\mathbb{U}(:\alpha + \beta) = \mathbb{U}(:\alpha) \sqcup \mathbb{U}(:\beta)$                                                                                                                                                                                                                                                                                                                                                                                                             |  |
| $\forall (s : \alpha \rightarrow \text{bool}) (t : \alpha \rightarrow \text{bool}) (g : \alpha \rightarrow \text{bool}). (s \text{ DIFF } t) \cap g = s \cap g \text{ DIFF } t$                                                                                                                                                                                                                                                                                                           |  |
| $\forall (Q : \text{num} \rightarrow \text{bool}) (P : \text{num} \rightarrow \text{bool}). (\exists (n : \text{num}). P \text{ } n) \wedge (\forall (n : \text{num}). (\forall (m : \text{num}). m < n \Rightarrow \neg P \text{ } m) \wedge P \text{ } n \Rightarrow Q \text{ } n) \Rightarrow Q (\$LEAST P)$                                                                                                                                                                           |  |
| $\forall (xs : \alpha \text{ list}). \text{FILTER } (\lambda (x : \alpha). F) \text{ } xs = ([] : \alpha \text{ list})$                                                                                                                                                                                                                                                                                                                                                                   |  |
| $\forall (f : \alpha \rightarrow \beta) (x : \alpha) (s : \alpha \rightarrow \text{bool}). \text{IMAGE } f (x \text{ INSERT } s) = f \text{ } x \text{ INSERT } \text{IMAGE } f \text{ } s$                                                                                                                                                                                                                                                                                               |  |
| $\forall (l1 : \alpha \text{ list}) (l2 : \alpha \text{ list}). \text{TAKE } (\text{LENGTH } l1) (l1 ++ l2) = l1$                                                                                                                                                                                                                                                                                                                                                                         |  |
| $\forall (l : \alpha \text{ list list}). \text{FLAT } l = \text{FOLDER } (\$++ : \alpha \text{ list} \rightarrow \alpha \text{ list} \rightarrow \alpha \text{ list}) ([] : \alpha \text{ list}) \text{ } l$                                                                                                                                                                                                                                                                              |  |
| $(\neg \text{LLEX } (R : \alpha \rightarrow \alpha \rightarrow \text{bool}) ([] : \alpha \text{ list}) ([] : \alpha \text{ list}) \wedge \neg \text{LLEX } R ((h1 : \alpha) :: (t1 : \alpha \text{ list})) ([] : \alpha \text{ list})) \wedge \text{LLEX } R ([] : \alpha \text{ list}) ((h2 : \alpha) :: (t2 : \alpha \text{ list})) \wedge (\text{LLEX } R (h1 :: t1) (h2 :: t2) \Leftrightarrow R \text{ } h1 \text{ } h2 \vee h1 = h2 \wedge \text{LLEX } R \text{ } t1 \text{ } t2)$ |  |
| $\forall (l : \alpha \text{ list}). l ++ ([] : \alpha \text{ list}) = l$                                                                                                                                                                                                                                                                                                                                                                                                                  |  |
| $\forall (s : \alpha \rightarrow \text{bool}) (f : \alpha \rightarrow \beta). f \in \text{FUNSET } s (\emptyset : \beta \rightarrow \text{bool}) \Leftrightarrow s = (\emptyset : \alpha \rightarrow \text{bool})$                                                                                                                                                                                                                                                                        |  |
| $\forall (b : \text{bool}). b \Rightarrow (b \Leftrightarrow T)$                                                                                                                                                                                                                                                                                                                                                                                                                          |  |
| $\forall (l : \alpha \text{ list}) (x : \alpha). \text{ELL } (0 : \text{num}) (\text{SNOC } x \text{ } l) = x$                                                                                                                                                                                                                                                                                                                                                                            |  |
| $\forall (ls : \alpha \text{ list}). ls \neq ([] : \alpha \text{ list}) \Rightarrow \text{MAP } (f : \alpha \rightarrow \beta) (\text{FRONT } ls) = \text{FRONT } (\text{MAP } f \text{ } ls)$                                                                                                                                                                                                                                                                                            |  |
| $\forall (n : \text{num}). (0 : \text{num}) < \text{SUC } n$                                                                                                                                                                                                                                                                                                                                                                                                                              |  |
| $\text{IMAGE } (f : \beta \rightarrow \alpha) (s : \beta \rightarrow \text{bool}) = \{(z : \alpha)\} \Leftrightarrow s \neq (\emptyset : \beta \rightarrow \text{bool}) \wedge \forall (x : \beta). x \in s \Rightarrow f \text{ } x = z$                                                                                                                                                                                                                                                 |  |
| $\forall (f : \alpha \rightarrow \beta \rightarrow \beta) (e : \beta) (l : \alpha \text{ list}). \text{FOLDER } f \text{ } e \text{ } l = \text{FOLDL } (\lambda (x : \beta) (y : \alpha). f \text{ } y \text{ } x) e (\text{REVERSE } l)$                                                                                                                                                                                                                                                |  |
| $\forall (l1 : \alpha \text{ list}) (l2 : \alpha \text{ list}) (a : \alpha). \text{IS\_SUFFIX } l1 \text{ } l2 \Rightarrow \text{IS\_SUFFIX } (a :: l1) \text{ } l2$                                                                                                                                                                                                                                                                                                                      |  |
| $\forall (x : \alpha) (P : \alpha \rightarrow \text{bool}). x \in P \Leftrightarrow P \text{ } x$                                                                                                                                                                                                                                                                                                                                                                                         |  |
| $\forall (R : \alpha \rightarrow \alpha \rightarrow \text{bool}). \text{StrongOrder } R \Rightarrow \text{Order } R$                                                                                                                                                                                                                                                                                                                                                                      |  |
| $\forall (n : \text{num}) (l : \alpha \text{ list}). n < \text{LENGTH } l \Rightarrow \text{MEM } (\text{EL } n \text{ } l) \text{ } l$                                                                                                                                                                                                                                                                                                                                                   |  |
| $\forall (x : \alpha) (y : \alpha) (P : \alpha \rightarrow \text{bool}). x \in y \text{ INSERT } P \Leftrightarrow x = y \vee x \neq y \wedge x \in P$                                                                                                                                                                                                                                                                                                                                    |  |
| $\text{OWHILE } (G : \alpha \rightarrow \text{bool}) (f : \alpha \rightarrow \alpha) (s : \alpha) = \text{SOME } (s' : \alpha) \Rightarrow \neg G \text{ } s'$                                                                                                                                                                                                                                                                                                                            |  |

|                                                                                                                                                                                                                 |
|-----------------------------------------------------------------------------------------------------------------------------------------------------------------------------------------------------------------|
| $\text{symmetric } (R1 : \alpha \rightarrow \alpha \rightarrow \text{bool}) \wedge \text{symmetric } (R2 : \beta \rightarrow \beta \rightarrow \text{bool}) \Rightarrow \text{symmetric } (R1 \text{ LEX } R2)$ |
| $\forall (P : \alpha \rightarrow \text{bool}) (l : \alpha \text{ list}). \text{PREFIX } P \ l \leq l$                                                                                                           |
| $\forall (s : \alpha \rightarrow \text{bool}) (f : \alpha \rightarrow \beta). (\exists (t : \beta \rightarrow \text{bool}). \text{INJ } f \ s \ t) \Rightarrow \text{BIJ } f \ s \ (\text{IMAGE } f \ s)$       |
| $\forall (s : \alpha \rightarrow \text{bool}). s \text{ DIFF } \mathbb{U}(:\alpha) = (\emptyset : \alpha \rightarrow \text{bool})$                                                                              |
| $\forall (t : \text{bool}). t \wedge t \Leftrightarrow t$                                                                                                                                                       |
| $(\exists (x : \alpha). x \in (s : \alpha \rightarrow \text{bool})) \wedge (\forall (x : \alpha). x \in s \Rightarrow (P : \alpha \rightarrow \text{bool}) \ x) \Rightarrow P \ (\text{CHOICE } s)$             |
